# Supplementary material for: Homeodomain protein Otp affects developmental neuropeptide switching in oxytocin neurons associated with a long-term effect on social behavior
Source: eLife. 2017 Jan 17;6:e22170. doi: 10.7554/eLife.22170 (PMC5293488; doi:10.7554/eLife.22170)
Supplement: Figure 1—figure supplement 1—source data 1. — DOI: http://dx.doi.org/10.7554/eLife.22170.006 [file elife-22170-fig1-figsupp1-data1.xlsx]

## Sheet: Figure1-Supplement 1A-C
Genotype	Trial no.	Time during the test	Mean velocity (cm/sec)
otpa-/-	Trial 34	Start-0:00:01	5.79391
otpa-/-	Trial 34	0:00:01-0:00:02	9.3503
otpa-/-	Trial 34	0:00:02-0:00:03	8.16269
otpa-/-	Trial 34	0:00:03-0:00:04	7.66749
otpa-/-	Trial 34	0:00:04-0:00:05	10.9392
otpa-/-	Trial 34	0:00:05-0:00:06	13.3266
otpa-/-	Trial 34	0:00:06-0:00:07	4.56379
otpa-/-	Trial 34	0:00:07-0:00:08	5.30345
otpa-/-	Trial 34	0:00:08-0:00:09	1.3609
otpa-/-	Trial 34	0:00:09-0:00:10	0.563166
otpa-/-	Trial 34	0:00:10-0:00:11	0.845798
otpa-/-	Trial 34	0:00:11-0:00:12	0.801651
otpa-/-	Trial 34	0:00:12-0:00:13	0.807009
otpa-/-	Trial 34	0:00:13-0:00:14	1.50352
otpa-/-	Trial 34	0:00:14-0:00:15	1.14578
otpa-/-	Trial 34	0:00:15-0:00:16	1.52518
otpa-/-	Trial 34	0:00:16-0:00:17	3.97797
otpa-/-	Trial 34	0:00:17-0:00:18	4.07848
otpa-/-	Trial 34	0:00:18-0:00:19	10.2955
otpa-/-	Trial 34	0:00:19-0:00:20	9.30683
otpa-/-	Trial 34	0:00:20-0:00:21	9.62047
otpa-/-	Trial 34	0:00:21-0:00:22	15.3478
otpa-/-	Trial 34	0:00:22-0:00:23	12.294
otpa-/-	Trial 34	0:00:23-0:00:24	10.9992
otpa-/-	Trial 34	0:00:24-0:00:25	7.41237
otpa-/-	Trial 34	0:00:25-0:00:26	10.6718
otpa-/-	Trial 34	0:00:26-0:00:27	6.61529
otpa-/-	Trial 34	0:00:27-0:00:28	6.64978
otpa-/-	Trial 34	0:00:28-0:00:29	9.52195
otpa-/-	Trial 34	0:00:29-0:00:30	6.37901
otpa-/-	Trial 34	0:00:30-0:00:31	13.3891
otpa-/-	Trial 34	0:00:31-0:00:32	10.3318
otpa-/-	Trial 34	0:00:32-0:00:33	9.28694
otpa-/-	Trial 34	0:00:33-0:00:34	10.5943
otpa-/-	Trial 34	0:00:34-0:00:35	13.6475
otpa-/-	Trial 34	0:00:35-0:00:36	13.8057
otpa-/-	Trial 34	0:00:36-0:00:37	8.20021
otpa-/-	Trial 34	0:00:37-0:00:38	6.15352
otpa-/-	Trial 34	0:00:38-0:00:39	8.46516
otpa-/-	Trial 34	0:00:39-0:00:40	8.31878
otpa-/-	Trial 34	0:00:40-0:00:41	6.24578
otpa-/-	Trial 34	0:00:41-0:00:42	5.76359
otpa-/-	Trial 34	0:00:42-0:00:43	6.05237
otpa-/-	Trial 34	0:00:43-0:00:44	5.97092
otpa-/-	Trial 34	0:00:44-0:00:45	5.8257
otpa-/-	Trial 34	0:00:45-0:00:46	7.23295
otpa-/-	Trial 34	0:00:46-0:00:47	7.92267
otpa-/-	Trial 34	0:00:47-0:00:48	5.74474
otpa-/-	Trial 34	0:00:48-0:00:49	8.77052
otpa-/-	Trial 34	0:00:49-0:00:50	11.664
otpa-/-	Trial 34	0:00:50-0:00:51	12.7496
otpa-/-	Trial 34	0:00:51-0:00:52	11.8581
otpa-/-	Trial 34	0:00:52-0:00:53	12.7699
otpa-/-	Trial 34	0:00:53-0:00:54	10.1534
otpa-/-	Trial 34	0:00:54-0:00:55	9.21833
otpa-/-	Trial 34	0:00:55-0:00:56	7.41711
otpa-/-	Trial 34	0:00:56-0:00:57	12.5939
otpa-/-	Trial 34	0:00:57-0:00:58	10.219
otpa-/-	Trial 34	0:00:58-0:00:59	9.96946
otpa-/-	Trial 34	0:00:59-0:01:00	7.49141
otpa-/-	Trial 34	0:01:00-0:01:01	10.2227
otpa-/-	Trial 34	0:01:01-0:01:02	6.48846
otpa-/-	Trial 34	0:01:02-0:01:03	6.32173
otpa-/-	Trial 34	0:01:03-0:01:04	6.52521
otpa-/-	Trial 34	0:01:04-0:01:05	6.89163
otpa-/-	Trial 34	0:01:05-0:01:06	10.0648
otpa-/-	Trial 34	0:01:06-0:01:07	6.75061
otpa-/-	Trial 34	0:01:07-0:01:08	11.192
otpa-/-	Trial 34	0:01:08-0:01:09	11.0249
otpa-/-	Trial 34	0:01:09-0:01:10	7.31563
otpa-/-	Trial 34	0:01:10-0:01:11	8.88653
otpa-/-	Trial 34	0:01:11-0:01:12	6.56999
otpa-/-	Trial 34	0:01:12-0:01:13	7.86856
otpa-/-	Trial 34	0:01:13-0:01:14	11.1866
otpa-/-	Trial 34	0:01:14-0:01:15	6.61603
otpa-/-	Trial 34	0:01:15-0:01:16	8.45776
otpa-/-	Trial 34	0:01:16-0:01:17	6.92576
otpa-/-	Trial 34	0:01:17-0:01:18	9.84859
otpa-/-	Trial 34	0:01:18-0:01:19	8.52175
otpa-/-	Trial 34	0:01:19-0:01:20	4.92686
otpa-/-	Trial 34	0:01:20-0:01:21	9.53876
otpa-/-	Trial 34	0:01:21-0:01:22	8.41981
otpa-/-	Trial 34	0:01:22-0:01:23	10.9464
otpa-/-	Trial 34	0:01:23-0:01:24	11.9024
otpa-/-	Trial 34	0:01:24-0:01:25	7.60366
otpa-/-	Trial 34	0:01:25-0:01:26	6.96432
otpa-/-	Trial 34	0:01:26-0:01:27	12.8831
otpa-/-	Trial 34	0:01:27-0:01:28	10.5891
otpa-/-	Trial 34	0:01:28-0:01:29	6.2958
otpa-/-	Trial 34	0:01:29-0:01:30	8.08322
otpa-/-	Trial 34	0:01:30-0:01:31	7.70456
otpa-/-	Trial 34	0:01:31-0:01:32	6.69385
otpa-/-	Trial 34	0:01:32-0:01:33	9.17481
otpa-/-	Trial 34	0:01:33-0:01:34	5.94486
otpa-/-	Trial 34	0:01:34-0:01:35	9.2328
otpa-/-	Trial 34	0:01:35-0:01:36	9.84857
otpa-/-	Trial 34	0:01:36-0:01:37	12.294
otpa-/-	Trial 34	0:01:37-0:01:38	10.8107
otpa-/-	Trial 34	0:01:38-0:01:39	7.64046
otpa-/-	Trial 34	0:01:39-0:01:40	6.83853
otpa-/-	Trial 34	0:01:40-0:01:41	9.67555
otpa-/-	Trial 34	0:01:41-0:01:42	7.54228
otpa-/-	Trial 34	0:01:42-0:01:43	5.04852
otpa-/-	Trial 34	0:01:43-0:01:44	8.37496
otpa-/-	Trial 34	0:01:44-0:01:45	8.61467
otpa-/-	Trial 34	0:01:45-0:01:46	6.71992
otpa-/-	Trial 34	0:01:46-0:01:47	7.10549
otpa-/-	Trial 34	0:01:47-0:01:48	7.68217
otpa-/-	Trial 34	0:01:48-0:01:49	9.31301
otpa-/-	Trial 34	0:01:49-0:01:50	6.61406
otpa-/-	Trial 34	0:01:50-0:01:51	8.22531
otpa-/-	Trial 34	0:01:51-0:01:52	8.35396
otpa-/-	Trial 34	0:01:52-0:01:53	6.52289
otpa-/-	Trial 34	0:01:53-0:01:54	9.31882
otpa-/-	Trial 34	0:01:54-0:01:55	7.75258
otpa-/-	Trial 34	0:01:55-0:01:56	5.83277
otpa-/-	Trial 34	0:01:56-0:01:57	5.07686
otpa-/-	Trial 34	0:01:57-0:01:58	9.1507
otpa-/-	Trial 34	0:01:58-0:01:59	10.551
otpa-/-	Trial 34	0:01:59-0:02:00	7.82293
otpa-/-	Trial 34	0:02:00-0:02:01	6.10958
otpa-/-	Trial 34	0:02:01-0:02:02	8.96141
otpa-/-	Trial 34	0:02:02-0:02:03	10.5433
otpa-/-	Trial 34	0:02:03-0:02:04	10.0081
otpa-/-	Trial 34	0:02:04-0:02:05	15.4095
otpa-/-	Trial 34	0:02:05-0:02:06	10.441
otpa-/-	Trial 34	0:02:06-0:02:07	7.71752
otpa-/-	Trial 34	0:02:07-0:02:08	9.18446
otpa-/-	Trial 34	0:02:08-0:02:09	7.10068
otpa-/-	Trial 34	0:02:09-0:02:10	10.7196
otpa-/-	Trial 34	0:02:10-0:02:11	8.24925
otpa-/-	Trial 34	0:02:11-0:02:12	7.43289
otpa-/-	Trial 34	0:02:12-0:02:13	5.44648
otpa-/-	Trial 34	0:02:13-0:02:14	8.12544
otpa-/-	Trial 34	0:02:14-0:02:15	7.05904
otpa-/-	Trial 34	0:02:15-0:02:16	9.43049
otpa-/-	Trial 34	0:02:16-0:02:17	12.6103
otpa-/-	Trial 34	0:02:17-0:02:18	8.44383
otpa-/-	Trial 34	0:02:18-0:02:19	9.72379
otpa-/-	Trial 34	0:02:19-0:02:20	10.128
otpa-/-	Trial 34	0:02:20-0:02:21	8.70949
otpa-/-	Trial 34	0:02:21-0:02:22	8.71032
otpa-/-	Trial 34	0:02:22-0:02:23	11.6457
otpa-/-	Trial 34	0:02:23-0:02:24	14.8095
otpa-/-	Trial 34	0:02:24-0:02:25	9.71954
otpa-/-	Trial 34	0:02:25-0:02:26	8.80865
otpa-/-	Trial 34	0:02:26-0:02:27	10.0614
otpa-/-	Trial 34	0:02:27-0:02:28	7.84834
otpa-/-	Trial 34	0:02:28-0:02:29	6.63489
otpa-/-	Trial 34	0:02:29-0:02:30	7.32789
otpa-/-	Trial 34	0:02:30-0:02:31	8.60333
otpa-/-	Trial 34	0:02:31-0:02:32	8.0992
otpa-/-	Trial 34	0:02:32-0:02:33	10.5772
otpa-/-	Trial 34	0:02:33-0:02:34	9.94155
otpa-/-	Trial 34	0:02:34-0:02:35	8.1063
otpa-/-	Trial 34	0:02:35-0:02:36	9.70619
otpa-/-	Trial 34	0:02:36-0:02:37	8.9446
otpa-/-	Trial 34	0:02:37-0:02:38	9.85157
otpa-/-	Trial 34	0:02:38-0:02:39	13.2942
otpa-/-	Trial 34	0:02:39-0:02:40	11.4398
otpa-/-	Trial 34	0:02:40-0:02:41	10.1802
otpa-/-	Trial 34	0:02:41-0:02:42	9.91948
otpa-/-	Trial 34	0:02:42-0:02:43	10.2335
otpa-/-	Trial 34	0:02:43-0:02:44	12.4316
otpa-/-	Trial 34	0:02:44-0:02:45	10.2909
otpa-/-	Trial 34	0:02:45-0:02:46	10.2791
otpa-/-	Trial 34	0:02:46-0:02:47	6.00424
otpa-/-	Trial 34	0:02:47-0:02:48	7.36778
otpa-/-	Trial 34	0:02:48-0:02:49	13.3951
otpa-/-	Trial 34	0:02:49-0:02:50	9.68289
otpa-/-	Trial 34	0:02:50-0:02:51	6.87407
otpa-/-	Trial 34	0:02:51-0:02:52	7.65116
otpa-/-	Trial 34	0:02:52-0:02:53	8.12553
otpa-/-	Trial 34	0:02:53-0:02:54	8.19021
otpa-/-	Trial 34	0:02:54-0:02:55	4.98229
otpa-/-	Trial 34	0:02:55-0:02:56	10.3099
otpa-/-	Trial 34	0:02:56-0:02:57	11.7443
otpa-/-	Trial 34	0:02:57-0:02:58	13.7009
otpa-/-	Trial 34	0:02:58-0:02:59	5.11652
otpa-/-	Trial 34	0:02:59-0:03:00	8.10819
otpa-/-	Trial 34	0:03:00-0:03:01	5.67744
otpa-/-	Trial 34	0:03:01-0:03:02	7.35949
otpa-/-	Trial 34	0:03:02-0:03:03	8.99742
otpa-/-	Trial 34	0:03:03-0:03:04	7.33202
otpa-/-	Trial 34	0:03:04-0:03:05	7.57291
otpa-/-	Trial 34	0:03:05-0:03:06	7.70621
otpa-/-	Trial 34	0:03:06-0:03:07	10.2011
otpa-/-	Trial 34	0:03:07-0:03:08	11.5901
otpa-/-	Trial 34	0:03:08-0:03:09	12.8383
otpa-/-	Trial 34	0:03:09-0:03:10	7.63489
otpa-/-	Trial 34	0:03:10-0:03:11	8.27048
otpa-/-	Trial 34	0:03:11-0:03:12	9.1022
otpa-/-	Trial 34	0:03:12-0:03:13	11.5192
otpa-/-	Trial 34	0:03:13-0:03:14	6.17447
otpa-/-	Trial 34	0:03:14-0:03:15	9.10618
otpa-/-	Trial 34	0:03:15-0:03:16	12.2299
otpa-/-	Trial 34	0:03:16-0:03:17	6.23573
otpa-/-	Trial 34	0:03:17-0:03:18	3.61402
otpa-/-	Trial 34	0:03:18-0:03:19	10.4584
otpa-/-	Trial 34	0:03:19-0:03:20	6.62535
otpa-/-	Trial 34	0:03:20-0:03:21	7.81167
otpa-/-	Trial 34	0:03:21-0:03:22	11.4676
otpa-/-	Trial 34	0:03:22-0:03:23	10.9704
otpa-/-	Trial 34	0:03:23-0:03:24	10.747
otpa-/-	Trial 34	0:03:24-0:03:25	13.1251
otpa-/-	Trial 34	0:03:25-0:03:26	14.5337
otpa-/-	Trial 34	0:03:26-0:03:27	13.5994
otpa-/-	Trial 34	0:03:27-0:03:28	10.6567
otpa-/-	Trial 34	0:03:28-0:03:29	6.37848
otpa-/-	Trial 34	0:03:29-0:03:30	6.70062
otpa-/-	Trial 34	0:03:30-0:03:31	9.48672
otpa-/-	Trial 34	0:03:31-0:03:32	8.47208
otpa-/-	Trial 34	0:03:32-0:03:33	9.38548
otpa-/-	Trial 34	0:03:33-0:03:34	13.1466
otpa-/-	Trial 34	0:03:34-0:03:35	12.3856
otpa-/-	Trial 34	0:03:35-0:03:36	10.8943
otpa-/-	Trial 34	0:03:36-0:03:37	10.3398
otpa-/-	Trial 34	0:03:37-0:03:38	11.8691
otpa-/-	Trial 34	0:03:38-0:03:39	6.88695
otpa-/-	Trial 34	0:03:39-0:03:40	9.95351
otpa-/-	Trial 34	0:03:40-0:03:41	13.904
otpa-/-	Trial 34	0:03:41-0:03:42	12.1565
otpa-/-	Trial 34	0:03:42-0:03:43	8.20845
otpa-/-	Trial 34	0:03:43-0:03:44	8.35277
otpa-/-	Trial 34	0:03:44-0:03:45	11.3398
otpa-/-	Trial 34	0:03:45-0:03:46	8.089
otpa-/-	Trial 34	0:03:46-0:03:47	7.40743
otpa-/-	Trial 34	0:03:47-0:03:48	8.77208
otpa-/-	Trial 34	0:03:48-0:03:49	3.9648
otpa-/-	Trial 34	0:03:49-0:03:50	4.18783
otpa-/-	Trial 34	0:03:50-0:03:51	3.5708
otpa-/-	Trial 34	0:03:51-0:03:52	4.25174
otpa-/-	Trial 34	0:03:52-0:03:53	7.97646
otpa-/-	Trial 34	0:03:53-0:03:54	8.9603
otpa-/-	Trial 34	0:03:54-0:03:55	4.24925
otpa-/-	Trial 34	0:03:55-0:03:56	5.0664
otpa-/-	Trial 34	0:03:56-0:03:57	9.51586
otpa-/-	Trial 34	0:03:57-0:03:58	11.8816
otpa-/-	Trial 34	0:03:58-0:03:59	11.8726
otpa-/-	Trial 34	0:03:59-0:04:00	13.4998
otpa-/-	Trial 34	0:04:00-0:04:01	13.6741
otpa-/-	Trial 34	0:04:01-0:04:02	7.65392
otpa-/-	Trial 34	0:04:02-0:04:03	12.4217
otpa-/-	Trial 34	0:04:03-0:04:04	7.67941
otpa-/-	Trial 34	0:04:04-0:04:05	9.2848
otpa-/-	Trial 34	0:04:05-0:04:06	13.7838
otpa-/-	Trial 34	0:04:06-0:04:07	8.6533
otpa-/-	Trial 34	0:04:07-0:04:08	10.6601
otpa-/-	Trial 34	0:04:08-0:04:09	5.38856
otpa-/-	Trial 34	0:04:09-0:04:10	3.2721
otpa-/-	Trial 34	0:04:10-0:04:11	5.47478
otpa-/-	Trial 34	0:04:11-0:04:12	4.4967
otpa-/-	Trial 34	0:04:12-0:04:13	4.26022
otpa-/-	Trial 34	0:04:13-0:04:14	8.35377
otpa-/-	Trial 34	0:04:14-0:04:15	8.39292
otpa-/-	Trial 34	0:04:15-0:04:16	5.87243
otpa-/-	Trial 34	0:04:16-0:04:17	6.15251
otpa-/-	Trial 34	0:04:17-0:04:18	4.75067
otpa-/-	Trial 34	0:04:18-0:04:19	5.21038
otpa-/-	Trial 34	0:04:19-0:04:20	2.90341
otpa-/-	Trial 34	0:04:20-0:04:21	3.91432
otpa-/-	Trial 34	0:04:21-0:04:22	4.08097
otpa-/-	Trial 34	0:04:22-0:04:23	8.9028
otpa-/-	Trial 34	0:04:23-0:04:24	9.10782
otpa-/-	Trial 34	0:04:24-0:04:25	8.63447
otpa-/-	Trial 34	0:04:25-0:04:26	7.68537
otpa-/-	Trial 34	0:04:26-0:04:27	7.62762
otpa-/-	Trial 34	0:04:27-0:04:28	6.84584
otpa-/-	Trial 34	0:04:28-0:04:29	8.53549
otpa-/-	Trial 34	0:04:29-0:04:30	8.4411
otpa-/-	Trial 34	0:04:30-0:04:31	12.4034
otpa-/-	Trial 34	0:04:31-0:04:32	8.91794
otpa-/-	Trial 34	0:04:32-0:04:33	10.4841
otpa-/-	Trial 34	0:04:33-0:04:34	10.2686
otpa-/-	Trial 34	0:04:34-0:04:35	7.88236
otpa-/-	Trial 34	0:04:35-0:04:36	9.75973
otpa-/-	Trial 34	0:04:36-0:04:37	7.16517
otpa-/-	Trial 34	0:04:37-0:04:38	12.4202
otpa-/-	Trial 34	0:04:38-0:04:39	12.9983
otpa-/-	Trial 34	0:04:39-0:04:40	12.9913
otpa-/-	Trial 34	0:04:40-0:04:41	11.1562
otpa-/-	Trial 34	0:04:41-0:04:42	9.48372
otpa-/-	Trial 34	0:04:42-0:04:43	9.79753
otpa-/-	Trial 34	0:04:43-0:04:44	8.24379
otpa-/-	Trial 34	0:04:44-0:04:45	5.63261
otpa-/-	Trial 34	0:04:45-0:04:46	11.3005
otpa-/-	Trial 34	0:04:46-0:04:47	10.4536
otpa-/-	Trial 34	0:04:47-0:04:48	8.42783
otpa-/-	Trial 34	0:04:48-0:04:49	10.667
otpa-/-	Trial 34	0:04:49-0:04:50	10.8391
otpa-/-	Trial 34	0:04:50-0:04:51	13.9017
otpa-/-	Trial 34	0:04:51-0:04:52	12.6188
otpa-/-	Trial 34	0:04:52-0:04:53	10.2361
otpa-/-	Trial 34	0:04:53-0:04:54	11.8586
otpa-/-	Trial 34	0:04:54-0:04:55	14.7381
otpa-/-	Trial 34	0:04:55-0:04:56	14.5085
otpa-/-	Trial 34	0:04:56-0:04:57	16.1122
otpa-/-	Trial 34	0:04:57-0:04:58	10.778
otpa-/-	Trial 34	0:04:58-0:04:59	13.3001
otpa-/-	Trial 34	0:04:59-0:05:00	13.6708
otpa-/-	Trial 34	0:05:00-0:05:01	11.3388
otpa-/-	Trial 34	0:05:01-0:05:02	10.1231
otpa-/-	Trial 34	0:05:02-0:05:03	12.8814
otpa-/-	Trial 34	0:05:03-0:05:04	9.66734
otpa-/-	Trial 34	0:05:04-0:05:05	9.28934
otpa-/-	Trial 34	0:05:05-0:05:06	11.4447
otpa-/-	Trial 34	0:05:06-0:05:07	12.2379
otpa-/-	Trial 34	0:05:07-0:05:08	16.4001
otpa-/-	Trial 34	0:05:08-0:05:09	8.09192
otpa-/-	Trial 34	0:05:09-0:05:10	2.72315
otpa-/-	Trial 34	0:05:10-0:05:11	7.68188
otpa-/-	Trial 34	0:05:11-0:05:12	9.31009
otpa-/-	Trial 34	0:05:12-0:05:13	8.38322
otpa-/-	Trial 34	0:05:13-0:05:14	5.58944
otpa-/-	Trial 34	0:05:14-0:05:15	7.71078
otpa-/-	Trial 34	0:05:15-0:05:16	6.54155
otpa-/-	Trial 34	0:05:16-0:05:17	4.41596
otpa-/-	Trial 34	0:05:17-0:05:18	6.6309
otpa-/-	Trial 34	0:05:18-0:05:19	5.41156
otpa-/-	Trial 34	0:05:19-0:05:20	6.36419
otpa-/-	Trial 34	0:05:20-0:05:21	5.27976
otpa-/-	Trial 34	0:05:21-0:05:22	5.01256
otpa-/-	Trial 34	0:05:22-0:05:23	7.16807
otpa-/-	Trial 34	0:05:23-0:05:24	7.16891
otpa-/-	Trial 34	0:05:24-0:05:25	5.92814
otpa-/-	Trial 34	0:05:25-0:05:26	6.88129
otpa-/-	Trial 34	0:05:26-0:05:27	7.32532
otpa-/-	Trial 34	0:05:27-0:05:28	6.29014
otpa-/-	Trial 34	0:05:28-0:05:29	6.81305
otpa-/-	Trial 34	0:05:29-0:05:30	5.76492
otpa-/-	Trial 34	0:05:30-0:05:31	6.0265
otpa-/-	Trial 34	0:05:31-0:05:32	5.90579
otpa-/-	Trial 34	0:05:32-0:05:33	6.69767
otpa-/-	Trial 34	0:05:33-0:05:34	2.33262
otpa-/-	Trial 34	0:05:34-0:05:35	5.23493
otpa-/-	Trial 34	0:05:35-0:05:36	6.57053
otpa-/-	Trial 34	0:05:36-0:05:37	4.857
otpa-/-	Trial 34	0:05:37-0:05:38	13.3426
otpa-/-	Trial 34	0:05:38-0:05:39	7.20849
otpa-/-	Trial 34	0:05:39-0:05:40	6.81136
otpa-/-	Trial 34	0:05:40-0:05:41	7.06201
otpa-/-	Trial 34	0:05:41-0:05:42	5.21434
otpa-/-	Trial 34	0:05:42-0:05:43	6.05461
otpa-/-	Trial 34	0:05:43-0:05:44	8.25326
otpa-/-	Trial 34	0:05:44-0:05:45	6.11018
otpa-/-	Trial 34	0:05:45-0:05:46	10.9223
otpa-/-	Trial 34	0:05:46-0:05:47	11.6846
otpa-/-	Trial 34	0:05:47-0:05:48	7.65253
otpa-/-	Trial 34	0:05:48-0:05:49	4.761
otpa-/-	Trial 34	0:05:49-0:05:50	7.08203
otpa-/-	Trial 34	0:05:50-0:05:51	5.63903
otpa-/-	Trial 34	0:05:51-0:05:52	11.8398
otpa-/-	Trial 34	0:05:52-0:05:53	12.2696
otpa-/-	Trial 34	0:05:53-0:05:54	10.2937
otpa-/-	Trial 34	0:05:54-0:05:55	10.0029
otpa-/-	Trial 34	0:05:55-0:05:56	10.4927
otpa-/-	Trial 34	0:05:56-0:05:57	10.4188
otpa-/-	Trial 34	0:05:57-0:05:58	9.84321
otpa-/-	Trial 34	0:05:58-0:05:59	8.89586
otpa-/-	Trial 34	0:05:59-0:06:00	5.28008
otpa-/-	Trial 34	0:06:00-0:06:01	7.1839
otpa-/-	Trial 34	0:06:01-0:06:02	9.99744
otpa-/-	Trial 34	0:06:02-0:06:03	11.1073
otpa-/-	Trial 34	0:06:03-0:06:04	11.1116
otpa-/-	Trial 34	0:06:04-0:06:05	10.0319
otpa-/-	Trial 34	0:06:05-0:06:06	5.40692
otpa-/-	Trial 34	0:06:06-0:06:07	9.18941
otpa-/-	Trial 34	0:06:07-0:06:08	9.88877
otpa-/-	Trial 34	0:06:08-0:06:09	5.08953
otpa-/-	Trial 34	0:06:09-0:06:10	9.66811
otpa-/-	Trial 34	0:06:10-0:06:11	9.10668
otpa-/-	Trial 34	0:06:11-0:06:12	7.74713
otpa-/-	Trial 34	0:06:12-0:06:13	2.44446
otpa-/-	Trial 34	0:06:13-0:06:14	4.2625
otpa-/-	Trial 34	0:06:14-0:06:15	11.3251
otpa-/-	Trial 34	0:06:15-0:06:16	9.7295
otpa-/-	Trial 34	0:06:16-0:06:17	7.43945
otpa-/-	Trial 34	0:06:17-0:06:18	6.90374
otpa-/-	Trial 34	0:06:18-0:06:19	11.6686
otpa-/-	Trial 34	0:06:19-0:06:20	10.5595
otpa-/-	Trial 34	0:06:20-0:06:21	8.33909
otpa-/-	Trial 34	0:06:21-0:06:22	8.67933
otpa-/-	Trial 34	0:06:22-0:06:23	15.1032
otpa-/-	Trial 34	0:06:23-0:06:24	13.6875
otpa-/-	Trial 34	0:06:24-0:06:25	12.3027
otpa-/-	Trial 34	0:06:25-0:06:26	10.8744
otpa-/-	Trial 34	0:06:26-0:06:27	8.52648
otpa-/-	Trial 34	0:06:27-0:06:28	7.83573
otpa-/-	Trial 34	0:06:28-0:06:29	10.1731
otpa-/-	Trial 34	0:06:29-0:06:30	11.233
otpa-/-	Trial 34	0:06:30-0:06:31	13.6403
otpa-/-	Trial 34	0:06:31-0:06:32	10.0581
otpa-/-	Trial 34	0:06:32-0:06:33	9.43641
otpa-/-	Trial 34	0:06:33-0:06:34	11.565
otpa-/-	Trial 34	0:06:34-0:06:35	11.0908
otpa-/-	Trial 34	0:06:35-0:06:36	8.86423
otpa-/-	Trial 34	0:06:36-0:06:37	9.2107
otpa-/-	Trial 34	0:06:37-0:06:38	11.685
otpa-/-	Trial 34	0:06:38-0:06:39	10.5746
otpa-/-	Trial 34	0:06:39-0:06:40	8.44198
otpa-/-	Trial 34	0:06:40-0:06:41	10.7484
otpa-/-	Trial 34	0:06:41-0:06:42	9.12355
otpa-/-	Trial 34	0:06:42-0:06:43	11.4766
otpa-/-	Trial 34	0:06:43-0:06:44	9.82125
otpa-/-	Trial 34	0:06:44-0:06:45	11.8285
otpa-/-	Trial 34	0:06:45-0:06:46	9.21007
otpa-/-	Trial 34	0:06:46-0:06:47	10.8042
otpa-/-	Trial 34	0:06:47-0:06:48	11.4843
otpa-/-	Trial 34	0:06:48-0:06:49	10.2804
otpa-/-	Trial 34	0:06:49-0:06:50	14.5839
otpa-/-	Trial 34	0:06:50-0:06:51	11.7746
otpa-/-	Trial 34	0:06:51-0:06:52	12.0223
otpa-/-	Trial 34	0:06:52-0:06:53	10.7792
otpa-/-	Trial 34	0:06:53-0:06:54	10.1929
otpa-/-	Trial 34	0:06:54-0:06:55	12.7863
otpa-/-	Trial 34	0:06:55-0:06:56	12.7171
otpa-/-	Trial 34	0:06:56-0:06:57	10.2648
otpa-/-	Trial 34	0:06:57-0:06:58	9.79253
otpa-/-	Trial 34	0:06:58-0:06:59	13.1259
otpa-/-	Trial 34	0:06:59-0:07:00	5.00874
otpa-/-	Trial 34	0:07:00-0:07:01	10.648
otpa-/-	Trial 34	0:07:01-0:07:02	9.70092
otpa-/-	Trial 34	0:07:02-0:07:03	9.272
otpa-/-	Trial 34	0:07:03-0:07:04	9.38301
otpa-/-	Trial 34	0:07:04-0:07:05	7.71566
otpa-/-	Trial 34	0:07:05-0:07:06	9.40436
otpa-/-	Trial 34	0:07:06-0:07:07	7.77742
otpa-/-	Trial 34	0:07:07-0:07:08	6.23945
otpa-/-	Trial 34	0:07:08-0:07:09	7.22416
otpa-/-	Trial 34	0:07:09-0:07:10	5.5378
otpa-/-	Trial 34	0:07:10-0:07:11	7.4943
otpa-/-	Trial 34	0:07:11-0:07:12	9.4491
otpa-/-	Trial 34	0:07:12-0:07:13	5.47012
otpa-/-	Trial 34	0:07:13-0:07:14	10.1807
otpa-/-	Trial 34	0:07:14-0:07:15	11.7895
otpa-/-	Trial 34	0:07:15-0:07:16	12.4899
otpa-/-	Trial 34	0:07:16-0:07:17	14.3909
otpa-/-	Trial 34	0:07:17-0:07:18	10.1656
otpa-/-	Trial 34	0:07:18-0:07:19	10.9317
otpa-/-	Trial 34	0:07:19-0:07:20	13.8887
otpa-/-	Trial 34	0:07:20-0:07:21	11.5781
otpa-/-	Trial 34	0:07:21-0:07:22	10.5663
otpa-/-	Trial 34	0:07:22-0:07:23	10.3829
otpa-/-	Trial 34	0:07:23-0:07:24	8.69217
otpa-/-	Trial 34	0:07:24-0:07:25	6.49176
otpa-/-	Trial 34	0:07:25-0:07:26	6.39052
otpa-/-	Trial 34	0:07:26-0:07:27	7.73936
otpa-/-	Trial 34	0:07:27-0:07:28	11.1566
otpa-/-	Trial 34	0:07:28-0:07:29	12.6832
otpa-/-	Trial 34	0:07:29-0:07:30	11.0899
otpa-/-	Trial 34	0:07:30-0:07:31	11.7496
otpa-/-	Trial 34	0:07:31-0:07:32	7.52446
otpa-/-	Trial 34	0:07:32-0:07:33	8.48083
otpa-/-	Trial 34	0:07:33-0:07:34	10.7527
otpa-/-	Trial 34	0:07:34-0:07:35	8.34493
otpa-/-	Trial 34	0:07:35-0:07:36	13.2966
otpa-/-	Trial 34	0:07:36-0:07:37	11.1004
otpa-/-	Trial 34	0:07:37-0:07:38	10.5619
otpa-/-	Trial 34	0:07:38-0:07:39	6.19508
otpa-/-	Trial 34	0:07:39-0:07:40	5.7977
otpa-/-	Trial 34	0:07:40-0:07:41	10.1827
otpa-/-	Trial 34	0:07:41-0:07:42	9.22017
otpa-/-	Trial 34	0:07:42-0:07:43	7.07803
otpa-/-	Trial 34	0:07:43-0:07:44	13.6409
otpa-/-	Trial 34	0:07:44-0:07:45	12.9824
otpa-/-	Trial 34	0:07:45-0:07:46	10.5835
otpa-/-	Trial 34	0:07:46-0:07:47	14.1731
otpa-/-	Trial 34	0:07:47-0:07:48	9.80229
otpa-/-	Trial 34	0:07:48-0:07:49	9.80145
otpa-/-	Trial 34	0:07:49-0:07:50	2.77843
otpa-/-	Trial 34	0:07:50-0:07:51	0.994922
otpa-/-	Trial 34	0:07:51-0:07:52	0.436869
otpa-/-	Trial 34	0:07:52-0:07:53	0.212982
otpa-/-	Trial 34	0:07:53-0:07:54	0.150278
otpa-/-	Trial 34	0:07:54-0:07:55	0.0901168
otpa-/-	Trial 34	0:07:55-0:07:56	0.152877
otpa-/-	Trial 34	0:07:56-0:07:57	0.155077
otpa-/-	Trial 34	0:07:57-0:07:58	0.117428
otpa-/-	Trial 34	0:07:58-0:07:59	0.130408
otpa-/-	Trial 34	0:07:59-0:08:00	0.103275
otpa-/-	Trial 34	0:08:00-0:08:01	0.0566739
otpa-/-	Trial 34	0:08:01-0:08:02	0.06651
otpa-/-	Trial 34	0:08:02-0:08:03	1.45451
otpa-/-	Trial 34	0:08:03-0:08:04	10.2334
otpa-/-	Trial 34	0:08:04-0:08:05	10.8841
otpa-/-	Trial 34	0:08:05-0:08:06	10.8881
otpa-/-	Trial 34	0:08:06-0:08:07	5.90687
otpa-/-	Trial 34	0:08:07-0:08:08	8.75756
otpa-/-	Trial 34	0:08:08-0:08:09	10.6089
otpa-/-	Trial 34	0:08:09-0:08:10	12.0036
otpa-/-	Trial 34	0:08:10-0:08:11	8.17815
otpa-/-	Trial 34	0:08:11-0:08:12	9.66794
otpa-/-	Trial 34	0:08:12-0:08:13	8.68492
otpa-/-	Trial 34	0:08:13-0:08:14	12.3744
otpa-/-	Trial 34	0:08:14-0:08:15	11.8063
otpa-/-	Trial 34	0:08:15-0:08:16	7.06476
otpa-/-	Trial 34	0:08:16-0:08:17	2.02427
otpa-/-	Trial 34	0:08:17-0:08:18	2.23385
otpa-/-	Trial 34	0:08:18-0:08:19	8.07686
otpa-/-	Trial 34	0:08:19-0:08:20	16.2749
otpa-/-	Trial 34	0:08:20-0:08:21	14.0658
otpa-/-	Trial 34	0:08:21-0:08:22	10.6179
otpa-/-	Trial 34	0:08:22-0:08:23	9.6174
otpa-/-	Trial 34	0:08:23-0:08:24	9.41261
otpa-/-	Trial 34	0:08:24-0:08:25	3.90841
otpa-/-	Trial 34	0:08:25-0:08:26	2.49146
otpa-/-	Trial 34	0:08:26-0:08:27	5.64576
otpa-/-	Trial 34	0:08:27-0:08:28	9.88208
otpa-/-	Trial 34	0:08:28-0:08:29	11.6572
otpa-/-	Trial 34	0:08:29-0:08:30	12.9128
otpa-/-	Trial 34	0:08:30-0:08:31	10.4352
otpa-/-	Trial 34	0:08:31-0:08:32	15.003
otpa-/-	Trial 34	0:08:32-0:08:33	13.5772
otpa-/-	Trial 34	0:08:33-0:08:34	10.1165
otpa-/-	Trial 34	0:08:34-0:08:35	2.38525
otpa-/-	Trial 34	0:08:35-0:08:36	1.2998
otpa-/-	Trial 34	0:08:36-0:08:37	0.702708
otpa-/-	Trial 34	0:08:37-0:08:38	3.04265
otpa-/-	Trial 34	0:08:38-0:08:39	8.76502
otpa-/-	Trial 34	0:08:39-0:08:40	12.6718
otpa-/-	Trial 34	0:08:40-0:08:41	12.286
otpa-/-	Trial 34	0:08:41-0:08:42	9.20768
otpa-/-	Trial 34	0:08:42-0:08:43	2.57357
otpa-/-	Trial 34	0:08:43-0:08:44	8.77536
otpa-/-	Trial 34	0:08:44-0:08:45	9.36737
otpa-/-	Trial 34	0:08:45-0:08:46	9.93654
otpa-/-	Trial 34	0:08:46-0:08:47	10.3913
otpa-/-	Trial 34	0:08:47-0:08:48	6.32671
otpa-/-	Trial 34	0:08:48-0:08:49	8.46097
otpa-/-	Trial 34	0:08:49-0:08:50	2.37298
otpa-/-	Trial 34	0:08:50-0:08:51	1.05967
otpa-/-	Trial 34	0:08:51-0:08:52	0.595532
otpa-/-	Trial 34	0:08:52-0:08:53	0.342259
otpa-/-	Trial 34	0:08:53-0:08:54	0.171362
otpa-/-	Trial 34	0:08:54-0:08:55	4.40946
otpa-/-	Trial 34	0:08:55-0:08:56	5.86744
otpa-/-	Trial 34	0:08:56-0:08:57	6.67218
otpa-/-	Trial 34	0:08:57-0:08:58	1.93883
otpa-/-	Trial 34	0:08:58-0:08:59	5.45013
otpa-/-	Trial 34	0:08:59-0:09:00	10.0787
otpa-/-	Trial 34	0:09:00-0:09:01	11.6327
otpa-/-	Trial 34	0:09:01-0:09:02	11.5713
otpa-/-	Trial 34	0:09:02-0:09:03	4.83848
otpa-/-	Trial 34	0:09:03-0:09:04	2.35238
otpa-/-	Trial 34	0:09:04-0:09:05	15.3418
otpa-/-	Trial 34	0:09:05-0:09:06	13.4104
otpa-/-	Trial 34	0:09:06-0:09:07	11.9488
otpa-/-	Trial 34	0:09:07-0:09:08	3.40837
otpa-/-	Trial 34	0:09:08-0:09:09	9.45342
otpa-/-	Trial 34	0:09:09-0:09:10	6.14654
otpa-/-	Trial 34	0:09:10-0:09:11	5.66157
otpa-/-	Trial 34	0:09:11-0:09:12	5.33351
otpa-/-	Trial 34	0:09:12-0:09:13	2.05248
otpa-/-	Trial 34	0:09:13-0:09:14	0.738207
otpa-/-	Trial 34	0:09:14-0:09:15	0.568579
otpa-/-	Trial 34	0:09:15-0:09:16	2.56587
otpa-/-	Trial 34	0:09:16-0:09:17	2.59374
otpa-/-	Trial 34	0:09:17-0:09:18	1.64078
otpa-/-	Trial 34	0:09:18-0:09:19	1.59068
otpa-/-	Trial 34	0:09:19-0:09:20	5.57954
otpa-/-	Trial 34	0:09:20-0:09:21	7.54516
otpa-/-	Trial 34	0:09:21-0:09:22	3.34637
otpa-/-	Trial 34	0:09:22-0:09:23	14.0597
otpa-/-	Trial 34	0:09:23-0:09:24	8.3157
otpa-/-	Trial 34	0:09:24-0:09:25	8.31147
otpa-/-	Trial 34	0:09:25-0:09:26	4.54376
otpa-/-	Trial 34	0:09:26-0:09:27	9.80434
otpa-/-	Trial 34	0:09:27-0:09:28	6.34779
otpa-/-	Trial 34	0:09:28-0:09:29	5.65023
otpa-/-	Trial 34	0:09:29-0:09:30	4.65208
otpa-/-	Trial 34	0:09:30-0:09:31	13.7349
otpa-/-	Trial 34	0:09:31-0:09:32	5.81631
otpa-/-	Trial 34	0:09:32-0:09:33	7.84771
otpa-/-	Trial 34	0:09:33-0:09:34	2.85416
otpa-/-	Trial 34	0:09:34-0:09:35	1.3424
otpa-/-	Trial 34	0:09:35-0:09:36	1.2669
otpa-/-	Trial 34	0:09:36-0:09:37	1.87979
otpa-/-	Trial 34	0:09:37-0:09:38	4.97416
otpa-/-	Trial 34	0:09:38-0:09:39	6.16534
otpa-/-	Trial 34	0:09:39-0:09:40	7.10483
otpa-/-	Trial 34	0:09:40-0:09:41	9.05475
otpa-/-	Trial 34	0:09:41-0:09:42	10.4753
otpa-/-	Trial 34	0:09:42-0:09:43	6.05897
otpa-/-	Trial 34	0:09:43-0:09:44	8.09703
otpa-/-	Trial 34	0:09:44-0:09:45	7.80875
otpa-/-	Trial 34	0:09:45-0:09:46	9.79957
otpa-/-	Trial 34	0:09:46-0:09:47	16.8006
otpa-/-	Trial 34	0:09:47-0:09:48	12.0591
otpa-/-	Trial 34	0:09:48-0:09:49	7.64836
otpa-/-	Trial 34	0:09:49-0:09:50	9.65631
otpa-/-	Trial 34	0:09:50-0:09:51	6.3313
otpa-/-	Trial 34	0:09:51-0:09:52	10.878
otpa-/-	Trial 34	0:09:52-0:09:53	4.19915
otpa-/-	Trial 34	0:09:53-0:09:54	3.12998
otpa-/-	Trial 34	0:09:54-0:09:55	5.51352
otpa-/-	Trial 34	0:09:55-0:09:56	3.51246
otpa-/-	Trial 34	0:09:56-0:09:57	2.69654
otpa-/-	Trial 34	0:09:57-0:09:58	7.69447
otpa-/-	Trial 34	0:09:58-0:09:59	5.29996
otpa-/-	Trial 34	0:09:59-0:10:00	6.63553
otpa-/-	Trial 34	0:10:00-0:10:01	9.78694
otpa-/-	Trial 35	Start-0:00:01	1.0416
otpa-/-	Trial 35	0:00:01-0:00:02	0.987947
otpa-/-	Trial 35	0:00:02-0:00:03	0.90877
otpa-/-	Trial 35	0:00:03-0:00:04	0.894606
otpa-/-	Trial 35	0:00:04-0:00:05	0.675631
otpa-/-	Trial 35	0:00:05-0:00:06	6.57712
otpa-/-	Trial 35	0:00:06-0:00:07	10.6262
otpa-/-	Trial 35	0:00:07-0:00:08	14.1391
otpa-/-	Trial 35	0:00:08-0:00:09	11.8641
otpa-/-	Trial 35	0:00:09-0:00:10	11.6267
otpa-/-	Trial 35	0:00:10-0:00:11	8.98699
otpa-/-	Trial 35	0:00:11-0:00:12	12.3327
otpa-/-	Trial 35	0:00:12-0:00:13	15.7292
otpa-/-	Trial 35	0:00:13-0:00:14	9.38014
otpa-/-	Trial 35	0:00:14-0:00:15	13.4585
otpa-/-	Trial 35	0:00:15-0:00:16	6.43993
otpa-/-	Trial 35	0:00:16-0:00:17	1.6709
otpa-/-	Trial 35	0:00:17-0:00:18	0.979234
otpa-/-	Trial 35	0:00:18-0:00:19	6.43252
otpa-/-	Trial 35	0:00:19-0:00:20	8.37703
otpa-/-	Trial 35	0:00:20-0:00:21	6.10283
otpa-/-	Trial 35	0:00:21-0:00:22	2.68855
otpa-/-	Trial 35	0:00:22-0:00:23	1.05104
otpa-/-	Trial 35	0:00:23-0:00:24	1.46552
otpa-/-	Trial 35	0:00:24-0:00:25	6.97576
otpa-/-	Trial 35	0:00:25-0:00:26	7.49316
otpa-/-	Trial 35	0:00:26-0:00:27	8.02346
otpa-/-	Trial 35	0:00:27-0:00:28	10.8722
otpa-/-	Trial 35	0:00:28-0:00:29	11.7017
otpa-/-	Trial 35	0:00:29-0:00:30	14.7439
otpa-/-	Trial 35	0:00:30-0:00:31	13.884
otpa-/-	Trial 35	0:00:31-0:00:32	10.171
otpa-/-	Trial 35	0:00:32-0:00:33	12.0783
otpa-/-	Trial 35	0:00:33-0:00:34	8.88708
otpa-/-	Trial 35	0:00:34-0:00:35	10.1802
otpa-/-	Trial 35	0:00:35-0:00:36	9.07072
otpa-/-	Trial 35	0:00:36-0:00:37	6.84955
otpa-/-	Trial 35	0:00:37-0:00:38	11.1944
otpa-/-	Trial 35	0:00:38-0:00:39	9.61875
otpa-/-	Trial 35	0:00:39-0:00:40	11.7997
otpa-/-	Trial 35	0:00:40-0:00:41	17.4626
otpa-/-	Trial 35	0:00:41-0:00:42	8.32492
otpa-/-	Trial 35	0:00:42-0:00:43	13.7125
otpa-/-	Trial 35	0:00:43-0:00:44	12.9425
otpa-/-	Trial 35	0:00:44-0:00:45	9.52225
otpa-/-	Trial 35	0:00:45-0:00:46	7.83064
otpa-/-	Trial 35	0:00:46-0:00:47	8.2964
otpa-/-	Trial 35	0:00:47-0:00:48	7.00751
otpa-/-	Trial 35	0:00:48-0:00:49	10.7786
otpa-/-	Trial 35	0:00:49-0:00:50	10.7964
otpa-/-	Trial 35	0:00:50-0:00:51	7.39835
otpa-/-	Trial 35	0:00:51-0:00:52	8.97919
otpa-/-	Trial 35	0:00:52-0:00:53	10.142
otpa-/-	Trial 35	0:00:53-0:00:54	8.14982
otpa-/-	Trial 35	0:00:54-0:00:55	10.6043
otpa-/-	Trial 35	0:00:55-0:00:56	9.56755
otpa-/-	Trial 35	0:00:56-0:00:57	13.1153
otpa-/-	Trial 35	0:00:57-0:00:58	9.16058
otpa-/-	Trial 35	0:00:58-0:00:59	11.1226
otpa-/-	Trial 35	0:00:59-0:01:00	11.627
otpa-/-	Trial 35	0:01:00-0:01:01	17.3317
otpa-/-	Trial 35	0:01:01-0:01:02	16.7025
otpa-/-	Trial 35	0:01:02-0:01:03	14.3029
otpa-/-	Trial 35	0:01:03-0:01:04	9.07868
otpa-/-	Trial 35	0:01:04-0:01:05	8.71993
otpa-/-	Trial 35	0:01:05-0:01:06	12.1224
otpa-/-	Trial 35	0:01:06-0:01:07	5.98985
otpa-/-	Trial 35	0:01:07-0:01:08	5.21425
otpa-/-	Trial 35	0:01:08-0:01:09	12.1567
otpa-/-	Trial 35	0:01:09-0:01:10	8.92171
otpa-/-	Trial 35	0:01:10-0:01:11	12.6077
otpa-/-	Trial 35	0:01:11-0:01:12	14.994
otpa-/-	Trial 35	0:01:12-0:01:13	15.1112
otpa-/-	Trial 35	0:01:13-0:01:14	7.45911
otpa-/-	Trial 35	0:01:14-0:01:15	9.44236
otpa-/-	Trial 35	0:01:15-0:01:16	13.8033
otpa-/-	Trial 35	0:01:16-0:01:17	7.18813
otpa-/-	Trial 35	0:01:17-0:01:18	8.60865
otpa-/-	Trial 35	0:01:18-0:01:19	9.47882
otpa-/-	Trial 35	0:01:19-0:01:20	13.8223
otpa-/-	Trial 35	0:01:20-0:01:21	9.07477
otpa-/-	Trial 35	0:01:21-0:01:22	11.0668
otpa-/-	Trial 35	0:01:22-0:01:23	10.4124
otpa-/-	Trial 35	0:01:23-0:01:24	12.8091
otpa-/-	Trial 35	0:01:24-0:01:25	13.0665
otpa-/-	Trial 35	0:01:25-0:01:26	7.51947
otpa-/-	Trial 35	0:01:26-0:01:27	11.1445
otpa-/-	Trial 35	0:01:27-0:01:28	12.157
otpa-/-	Trial 35	0:01:28-0:01:29	17.2176
otpa-/-	Trial 35	0:01:29-0:01:30	17.0991
otpa-/-	Trial 35	0:01:30-0:01:31	20.9702
otpa-/-	Trial 35	0:01:31-0:01:32	8.42656
otpa-/-	Trial 35	0:01:32-0:01:33	21.8949
otpa-/-	Trial 35	0:01:33-0:01:34	3.71255
otpa-/-	Trial 35	0:01:34-0:01:35	0.958438
otpa-/-	Trial 35	0:01:35-0:01:36	4.14403
otpa-/-	Trial 35	0:01:36-0:01:37	7.92281
otpa-/-	Trial 35	0:01:37-0:01:38	8.47726
otpa-/-	Trial 35	0:01:38-0:01:39	9.52379
otpa-/-	Trial 35	0:01:39-0:01:40	12.4331
otpa-/-	Trial 35	0:01:40-0:01:41	10.5522
otpa-/-	Trial 35	0:01:41-0:01:42	14.1107
otpa-/-	Trial 35	0:01:42-0:01:43	10.0883
otpa-/-	Trial 35	0:01:43-0:01:44	11.0481
otpa-/-	Trial 35	0:01:44-0:01:45	7.96794
otpa-/-	Trial 35	0:01:45-0:01:46	8.23298
otpa-/-	Trial 35	0:01:46-0:01:47	9.05014
otpa-/-	Trial 35	0:01:47-0:01:48	7.05867
otpa-/-	Trial 35	0:01:48-0:01:49	10.6333
otpa-/-	Trial 35	0:01:49-0:01:50	7.85551
otpa-/-	Trial 35	0:01:50-0:01:51	6.41533
otpa-/-	Trial 35	0:01:51-0:01:52	6.99249
otpa-/-	Trial 35	0:01:52-0:01:53	8.19876
otpa-/-	Trial 35	0:01:53-0:01:54	11.9162
otpa-/-	Trial 35	0:01:54-0:01:55	11.8822
otpa-/-	Trial 35	0:01:55-0:01:56	7.57863
otpa-/-	Trial 35	0:01:56-0:01:57	12.2806
otpa-/-	Trial 35	0:01:57-0:01:58	6.41565
otpa-/-	Trial 35	0:01:58-0:01:59	8.82819
otpa-/-	Trial 35	0:01:59-0:02:00	4.4164
otpa-/-	Trial 35	0:02:00-0:02:01	5.70568
otpa-/-	Trial 35	0:02:01-0:02:02	14.4328
otpa-/-	Trial 35	0:02:02-0:02:03	5.71981
otpa-/-	Trial 35	0:02:03-0:02:04	7.84386
otpa-/-	Trial 35	0:02:04-0:02:05	6.89033
otpa-/-	Trial 35	0:02:05-0:02:06	9.22963
otpa-/-	Trial 35	0:02:06-0:02:07	7.83959
otpa-/-	Trial 35	0:02:07-0:02:08	8.70315
otpa-/-	Trial 35	0:02:08-0:02:09	9.46396
otpa-/-	Trial 35	0:02:09-0:02:10	10.392
otpa-/-	Trial 35	0:02:10-0:02:11	14.7804
otpa-/-	Trial 35	0:02:11-0:02:12	6.93433
otpa-/-	Trial 35	0:02:12-0:02:13	8.56048
otpa-/-	Trial 35	0:02:13-0:02:14	10.7574
otpa-/-	Trial 35	0:02:14-0:02:15	10.3464
otpa-/-	Trial 35	0:02:15-0:02:16	12.172
otpa-/-	Trial 35	0:02:16-0:02:17	13.5046
otpa-/-	Trial 35	0:02:17-0:02:18	12.5555
otpa-/-	Trial 35	0:02:18-0:02:19	13.0975
otpa-/-	Trial 35	0:02:19-0:02:20	6.70044
otpa-/-	Trial 35	0:02:20-0:02:21	8.45026
otpa-/-	Trial 35	0:02:21-0:02:22	10.8319
otpa-/-	Trial 35	0:02:22-0:02:23	6.06414
otpa-/-	Trial 35	0:02:23-0:02:24	8.13781
otpa-/-	Trial 35	0:02:24-0:02:25	8.81133
otpa-/-	Trial 35	0:02:25-0:02:26	8.43453
otpa-/-	Trial 35	0:02:26-0:02:27	7.28727
otpa-/-	Trial 35	0:02:27-0:02:28	7.31748
otpa-/-	Trial 35	0:02:28-0:02:29	10.2491
otpa-/-	Trial 35	0:02:29-0:02:30	9.51514
otpa-/-	Trial 35	0:02:30-0:02:31	8.16937
otpa-/-	Trial 35	0:02:31-0:02:32	10.2269
otpa-/-	Trial 35	0:02:32-0:02:33	12.223
otpa-/-	Trial 35	0:02:33-0:02:34	9.43879
otpa-/-	Trial 35	0:02:34-0:02:35	7.51003
otpa-/-	Trial 35	0:02:35-0:02:36	9.77356
otpa-/-	Trial 35	0:02:36-0:02:37	10.7441
otpa-/-	Trial 35	0:02:37-0:02:38	9.30887
otpa-/-	Trial 35	0:02:38-0:02:39	14.3217
otpa-/-	Trial 35	0:02:39-0:02:40	6.16331
otpa-/-	Trial 35	0:02:40-0:02:41	9.13536
otpa-/-	Trial 35	0:02:41-0:02:42	9.58259
otpa-/-	Trial 35	0:02:42-0:02:43	8.77659
otpa-/-	Trial 35	0:02:43-0:02:44	10.6548
otpa-/-	Trial 35	0:02:44-0:02:45	9.27508
otpa-/-	Trial 35	0:02:45-0:02:46	8.77026
otpa-/-	Trial 35	0:02:46-0:02:47	8.76684
otpa-/-	Trial 35	0:02:47-0:02:48	7.92765
otpa-/-	Trial 35	0:02:48-0:02:49	11.3813
otpa-/-	Trial 35	0:02:49-0:02:50	9.11004
otpa-/-	Trial 35	0:02:50-0:02:51	9.45234
otpa-/-	Trial 35	0:02:51-0:02:52	21.4258
otpa-/-	Trial 35	0:02:52-0:02:53	6.31991
otpa-/-	Trial 35	0:02:53-0:02:54	5.53057
otpa-/-	Trial 35	0:02:54-0:02:55	8.75797
otpa-/-	Trial 35	0:02:55-0:02:56	10.9586
otpa-/-	Trial 35	0:02:56-0:02:57	8.40484
otpa-/-	Trial 35	0:02:57-0:02:58	9.54268
otpa-/-	Trial 35	0:02:58-0:02:59	9.08487
otpa-/-	Trial 35	0:02:59-0:03:00	8.57414
otpa-/-	Trial 35	0:03:00-0:03:01	6.60079
otpa-/-	Trial 35	0:03:01-0:03:02	7.88685
otpa-/-	Trial 35	0:03:02-0:03:03	9.74314
otpa-/-	Trial 35	0:03:03-0:03:04	9.96525
otpa-/-	Trial 35	0:03:04-0:03:05	14.3881
otpa-/-	Trial 35	0:03:05-0:03:06	8.60704
otpa-/-	Trial 35	0:03:06-0:03:07	5.44475
otpa-/-	Trial 35	0:03:07-0:03:08	14.2418
otpa-/-	Trial 35	0:03:08-0:03:09	18.5345
otpa-/-	Trial 35	0:03:09-0:03:10	12.649
otpa-/-	Trial 35	0:03:10-0:03:11	5.00007
otpa-/-	Trial 35	0:03:11-0:03:12	6.49058
otpa-/-	Trial 35	0:03:12-0:03:13	7.60152
otpa-/-	Trial 35	0:03:13-0:03:14	7.29336
otpa-/-	Trial 35	0:03:14-0:03:15	6.91495
otpa-/-	Trial 35	0:03:15-0:03:16	6.50462
otpa-/-	Trial 35	0:03:16-0:03:17	8.93839
otpa-/-	Trial 35	0:03:17-0:03:18	7.64017
otpa-/-	Trial 35	0:03:18-0:03:19	8.84531
otpa-/-	Trial 35	0:03:19-0:03:20	6.57441
otpa-/-	Trial 35	0:03:20-0:03:21	10.2294
otpa-/-	Trial 35	0:03:21-0:03:22	11.7785
otpa-/-	Trial 35	0:03:22-0:03:23	15.7704
otpa-/-	Trial 35	0:03:23-0:03:24	11.51
otpa-/-	Trial 35	0:03:24-0:03:25	9.70942
otpa-/-	Trial 35	0:03:25-0:03:26	7.95622
otpa-/-	Trial 35	0:03:26-0:03:27	9.08998
otpa-/-	Trial 35	0:03:27-0:03:28	14.71
otpa-/-	Trial 35	0:03:28-0:03:29	12.8843
otpa-/-	Trial 35	0:03:29-0:03:30	8.74046
otpa-/-	Trial 35	0:03:30-0:03:31	9.53613
otpa-/-	Trial 35	0:03:31-0:03:32	9.04578
otpa-/-	Trial 35	0:03:32-0:03:33	9.28866
otpa-/-	Trial 35	0:03:33-0:03:34	12.5208
otpa-/-	Trial 35	0:03:34-0:03:35	13.0725
otpa-/-	Trial 35	0:03:35-0:03:36	12.1757
otpa-/-	Trial 35	0:03:36-0:03:37	12.0049
otpa-/-	Trial 35	0:03:37-0:03:38	15.6163
otpa-/-	Trial 35	0:03:38-0:03:39	8.78623
otpa-/-	Trial 35	0:03:39-0:03:40	11.5568
otpa-/-	Trial 35	0:03:40-0:03:41	8.70235
otpa-/-	Trial 35	0:03:41-0:03:42	11.0763
otpa-/-	Trial 35	0:03:42-0:03:43	16.9492
otpa-/-	Trial 35	0:03:43-0:03:44	12.2839
otpa-/-	Trial 35	0:03:44-0:03:45	13.402
otpa-/-	Trial 35	0:03:45-0:03:46	15.4544
otpa-/-	Trial 35	0:03:46-0:03:47	13.4579
otpa-/-	Trial 35	0:03:47-0:03:48	9.92653
otpa-/-	Trial 35	0:03:48-0:03:49	9.44895
otpa-/-	Trial 35	0:03:49-0:03:50	10.2277
otpa-/-	Trial 35	0:03:50-0:03:51	9.44008
otpa-/-	Trial 35	0:03:51-0:03:52	12.2439
otpa-/-	Trial 35	0:03:52-0:03:53	8.86887
otpa-/-	Trial 35	0:03:53-0:03:54	6.21853
otpa-/-	Trial 35	0:03:54-0:03:55	10.8313
otpa-/-	Trial 35	0:03:55-0:03:56	12.5881
otpa-/-	Trial 35	0:03:56-0:03:57	8.64129
otpa-/-	Trial 35	0:03:57-0:03:58	10.1205
otpa-/-	Trial 35	0:03:58-0:03:59	9.21419
otpa-/-	Trial 35	0:03:59-0:04:00	15.7302
otpa-/-	Trial 35	0:04:00-0:04:01	12.7347
otpa-/-	Trial 35	0:04:01-0:04:02	8.29756
otpa-/-	Trial 35	0:04:02-0:04:03	10.1671
otpa-/-	Trial 35	0:04:03-0:04:04	10.6351
otpa-/-	Trial 35	0:04:04-0:04:05	10.3433
otpa-/-	Trial 35	0:04:05-0:04:06	11.3205
otpa-/-	Trial 35	0:04:06-0:04:07	12.456
otpa-/-	Trial 35	0:04:07-0:04:08	16.5039
otpa-/-	Trial 35	0:04:08-0:04:09	12.2478
otpa-/-	Trial 35	0:04:09-0:04:10	8.59097
otpa-/-	Trial 35	0:04:10-0:04:11	9.75364
otpa-/-	Trial 35	0:04:11-0:04:12	12.7415
otpa-/-	Trial 35	0:04:12-0:04:13	11.3451
otpa-/-	Trial 35	0:04:13-0:04:14	9.38438
otpa-/-	Trial 35	0:04:14-0:04:15	12.2928
otpa-/-	Trial 35	0:04:15-0:04:16	12.3027
otpa-/-	Trial 35	0:04:16-0:04:17	7.48439
otpa-/-	Trial 35	0:04:17-0:04:18	12.3757
otpa-/-	Trial 35	0:04:18-0:04:19	11.1158
otpa-/-	Trial 35	0:04:19-0:04:20	12.4166
otpa-/-	Trial 35	0:04:20-0:04:21	11.4863
otpa-/-	Trial 35	0:04:21-0:04:22	9.03582
otpa-/-	Trial 35	0:04:22-0:04:23	9.87385
otpa-/-	Trial 35	0:04:23-0:04:24	10.1149
otpa-/-	Trial 35	0:04:24-0:04:25	9.06997
otpa-/-	Trial 35	0:04:25-0:04:26	11.8655
otpa-/-	Trial 35	0:04:26-0:04:27	13.0715
otpa-/-	Trial 35	0:04:27-0:04:28	9.09941
otpa-/-	Trial 35	0:04:28-0:04:29	8.65892
otpa-/-	Trial 35	0:04:29-0:04:30	14.8453
otpa-/-	Trial 35	0:04:30-0:04:31	8.20324
otpa-/-	Trial 35	0:04:31-0:04:32	13.229
otpa-/-	Trial 35	0:04:32-0:04:33	9.56845
otpa-/-	Trial 35	0:04:33-0:04:34	12.2421
otpa-/-	Trial 35	0:04:34-0:04:35	10.1064
otpa-/-	Trial 35	0:04:35-0:04:36	7.74538
otpa-/-	Trial 35	0:04:36-0:04:37	9.98026
otpa-/-	Trial 35	0:04:37-0:04:38	8.89709
otpa-/-	Trial 35	0:04:38-0:04:39	10.2395
otpa-/-	Trial 35	0:04:39-0:04:40	13.1805
otpa-/-	Trial 35	0:04:40-0:04:41	11.3705
otpa-/-	Trial 35	0:04:41-0:04:42	14.7513
otpa-/-	Trial 35	0:04:42-0:04:43	9.40671
otpa-/-	Trial 35	0:04:43-0:04:44	11.9078
otpa-/-	Trial 35	0:04:44-0:04:45	11.6827
otpa-/-	Trial 35	0:04:45-0:04:46	11.7205
otpa-/-	Trial 35	0:04:46-0:04:47	12.5009
otpa-/-	Trial 35	0:04:47-0:04:48	10.968
otpa-/-	Trial 35	0:04:48-0:04:49	8.73101
otpa-/-	Trial 35	0:04:49-0:04:50	12.9833
otpa-/-	Trial 35	0:04:50-0:04:51	9.80977
otpa-/-	Trial 35	0:04:51-0:04:52	11.1033
otpa-/-	Trial 35	0:04:52-0:04:53	9.59672
otpa-/-	Trial 35	0:04:53-0:04:54	11.7417
otpa-/-	Trial 35	0:04:54-0:04:55	9.40222
otpa-/-	Trial 35	0:04:55-0:04:56	5.88268
otpa-/-	Trial 35	0:04:56-0:04:57	12.1673
otpa-/-	Trial 35	0:04:57-0:04:58	14.8202
otpa-/-	Trial 35	0:04:58-0:04:59	12.2329
otpa-/-	Trial 35	0:04:59-0:05:00	11.0016
otpa-/-	Trial 35	0:05:00-0:05:01	11.1693
otpa-/-	Trial 35	0:05:01-0:05:02	10.6841
otpa-/-	Trial 35	0:05:02-0:05:03	7.52018
otpa-/-	Trial 35	0:05:03-0:05:04	13.1829
otpa-/-	Trial 35	0:05:04-0:05:05	13.1398
otpa-/-	Trial 35	0:05:05-0:05:06	9.39881
otpa-/-	Trial 35	0:05:06-0:05:07	13.6205
otpa-/-	Trial 35	0:05:07-0:05:08	11.9807
otpa-/-	Trial 35	0:05:08-0:05:09	10.9419
otpa-/-	Trial 35	0:05:09-0:05:10	7.96707
otpa-/-	Trial 35	0:05:10-0:05:11	7.91538
otpa-/-	Trial 35	0:05:11-0:05:12	5.22741
otpa-/-	Trial 35	0:05:12-0:05:13	8.83653
otpa-/-	Trial 35	0:05:13-0:05:14	6.48633
otpa-/-	Trial 35	0:05:14-0:05:15	12.5824
otpa-/-	Trial 35	0:05:15-0:05:16	12.3661
otpa-/-	Trial 35	0:05:16-0:05:17	14.3237
otpa-/-	Trial 35	0:05:17-0:05:18	10.0395
otpa-/-	Trial 35	0:05:18-0:05:19	11.2282
otpa-/-	Trial 35	0:05:19-0:05:20	11.0185
otpa-/-	Trial 35	0:05:20-0:05:21	11.3866
otpa-/-	Trial 35	0:05:21-0:05:22	16.1663
otpa-/-	Trial 35	0:05:22-0:05:23	10.7712
otpa-/-	Trial 35	0:05:23-0:05:24	15.6503
otpa-/-	Trial 35	0:05:24-0:05:25	15.1247
otpa-/-	Trial 35	0:05:25-0:05:26	15.856
otpa-/-	Trial 35	0:05:26-0:05:27	10.5875
otpa-/-	Trial 35	0:05:27-0:05:28	11.6997
otpa-/-	Trial 35	0:05:28-0:05:29	15.1521
otpa-/-	Trial 35	0:05:29-0:05:30	8.97401
otpa-/-	Trial 35	0:05:30-0:05:31	15.9751
otpa-/-	Trial 35	0:05:31-0:05:32	13.647
otpa-/-	Trial 35	0:05:32-0:05:33	9.60171
otpa-/-	Trial 35	0:05:33-0:05:34	7.5534
otpa-/-	Trial 35	0:05:34-0:05:35	9.92204
otpa-/-	Trial 35	0:05:35-0:05:36	10.0688
otpa-/-	Trial 35	0:05:36-0:05:37	12.966
otpa-/-	Trial 35	0:05:37-0:05:38	15.2996
otpa-/-	Trial 35	0:05:38-0:05:39	14.4626
otpa-/-	Trial 35	0:05:39-0:05:40	13.1562
otpa-/-	Trial 35	0:05:40-0:05:41	9.19252
otpa-/-	Trial 35	0:05:41-0:05:42	15.0906
otpa-/-	Trial 35	0:05:42-0:05:43	11.9458
otpa-/-	Trial 35	0:05:43-0:05:44	7.45269
otpa-/-	Trial 35	0:05:44-0:05:45	8.74752
otpa-/-	Trial 35	0:05:45-0:05:46	8.37101
otpa-/-	Trial 35	0:05:46-0:05:47	11.5886
otpa-/-	Trial 35	0:05:47-0:05:48	14.447
otpa-/-	Trial 35	0:05:48-0:05:49	10.2799
otpa-/-	Trial 35	0:05:49-0:05:50	13.5161
otpa-/-	Trial 35	0:05:50-0:05:51	16.6443
otpa-/-	Trial 35	0:05:51-0:05:52	16.4941
otpa-/-	Trial 35	0:05:52-0:05:53	14.2537
otpa-/-	Trial 35	0:05:53-0:05:54	10.2012
otpa-/-	Trial 35	0:05:54-0:05:55	7.45084
otpa-/-	Trial 35	0:05:55-0:05:56	7.99942
otpa-/-	Trial 35	0:05:56-0:05:57	7.07747
otpa-/-	Trial 35	0:05:57-0:05:58	9.29197
otpa-/-	Trial 35	0:05:58-0:05:59	5.74872
otpa-/-	Trial 35	0:05:59-0:06:00	10.1025
otpa-/-	Trial 35	0:06:00-0:06:01	11.0839
otpa-/-	Trial 35	0:06:01-0:06:02	16.2326
otpa-/-	Trial 35	0:06:02-0:06:03	15.4981
otpa-/-	Trial 35	0:06:03-0:06:04	8.41415
otpa-/-	Trial 35	0:06:04-0:06:05	10.7713
otpa-/-	Trial 35	0:06:05-0:06:06	8.46767
otpa-/-	Trial 35	0:06:06-0:06:07	6.75128
otpa-/-	Trial 35	0:06:07-0:06:08	9.12159
otpa-/-	Trial 35	0:06:08-0:06:09	11.1025
otpa-/-	Trial 35	0:06:09-0:06:10	12.2729
otpa-/-	Trial 35	0:06:10-0:06:11	3.66478
otpa-/-	Trial 35	0:06:11-0:06:12	6.51634
otpa-/-	Trial 35	0:06:12-0:06:13	7.08632
otpa-/-	Trial 35	0:06:13-0:06:14	9.45209
otpa-/-	Trial 35	0:06:14-0:06:15	10.383
otpa-/-	Trial 35	0:06:15-0:06:16	6.68103
otpa-/-	Trial 35	0:06:16-0:06:17	9.05322
otpa-/-	Trial 35	0:06:17-0:06:18	13.543
otpa-/-	Trial 35	0:06:18-0:06:19	9.90269
otpa-/-	Trial 35	0:06:19-0:06:20	12.9909
otpa-/-	Trial 35	0:06:20-0:06:21	8.76857
otpa-/-	Trial 35	0:06:21-0:06:22	12.1993
otpa-/-	Trial 35	0:06:22-0:06:23	12.1403
otpa-/-	Trial 35	0:06:23-0:06:24	14.4842
otpa-/-	Trial 35	0:06:24-0:06:25	16.482
otpa-/-	Trial 35	0:06:25-0:06:26	10.1384
otpa-/-	Trial 35	0:06:26-0:06:27	9.76442
otpa-/-	Trial 35	0:06:27-0:06:28	13.5948
otpa-/-	Trial 35	0:06:28-0:06:29	14.2928
otpa-/-	Trial 35	0:06:29-0:06:30	14.2992
otpa-/-	Trial 35	0:06:30-0:06:31	8.45042
otpa-/-	Trial 35	0:06:31-0:06:32	5.69208
otpa-/-	Trial 35	0:06:32-0:06:33	5.57303
otpa-/-	Trial 35	0:06:33-0:06:34	3.85595
otpa-/-	Trial 35	0:06:34-0:06:35	7.58826
otpa-/-	Trial 35	0:06:35-0:06:36	9.2
otpa-/-	Trial 35	0:06:36-0:06:37	5.93095
otpa-/-	Trial 35	0:06:37-0:06:38	6.04622
otpa-/-	Trial 35	0:06:38-0:06:39	11.3977
otpa-/-	Trial 35	0:06:39-0:06:40	14.7068
otpa-/-	Trial 35	0:06:40-0:06:41	11.1338
otpa-/-	Trial 35	0:06:41-0:06:42	8.59752
otpa-/-	Trial 35	0:06:42-0:06:43	6.39386
otpa-/-	Trial 35	0:06:43-0:06:44	11.3735
otpa-/-	Trial 35	0:06:44-0:06:45	8.68285
otpa-/-	Trial 35	0:06:45-0:06:46	7.26563
otpa-/-	Trial 35	0:06:46-0:06:47	7.53746
otpa-/-	Trial 35	0:06:47-0:06:48	6.36839
otpa-/-	Trial 35	0:06:48-0:06:49	11.7159
otpa-/-	Trial 35	0:06:49-0:06:50	9.41101
otpa-/-	Trial 35	0:06:50-0:06:51	8.06071
otpa-/-	Trial 35	0:06:51-0:06:52	8.18285
otpa-/-	Trial 35	0:06:52-0:06:53	10.7724
otpa-/-	Trial 35	0:06:53-0:06:54	7.49851
otpa-/-	Trial 35	0:06:54-0:06:55	11.0848
otpa-/-	Trial 35	0:06:55-0:06:56	8.52436
otpa-/-	Trial 35	0:06:56-0:06:57	12.3148
otpa-/-	Trial 35	0:06:57-0:06:58	15.3479
otpa-/-	Trial 35	0:06:58-0:06:59	9.26189
otpa-/-	Trial 35	0:06:59-0:07:00	10.1541
otpa-/-	Trial 35	0:07:00-0:07:01	7.95869
otpa-/-	Trial 35	0:07:01-0:07:02	6.68647
otpa-/-	Trial 35	0:07:02-0:07:03	9.54987
otpa-/-	Trial 35	0:07:03-0:07:04	8.61894
otpa-/-	Trial 35	0:07:04-0:07:05	13.5037
otpa-/-	Trial 35	0:07:05-0:07:06	9.57323
otpa-/-	Trial 35	0:07:06-0:07:07	9.93361
otpa-/-	Trial 35	0:07:07-0:07:08	6.31272
otpa-/-	Trial 35	0:07:08-0:07:09	11.0868
otpa-/-	Trial 35	0:07:09-0:07:10	15.5906
otpa-/-	Trial 35	0:07:10-0:07:11	10.455
otpa-/-	Trial 35	0:07:11-0:07:12	11.8196
otpa-/-	Trial 35	0:07:12-0:07:13	10.0715
otpa-/-	Trial 35	0:07:13-0:07:14	9.13092
otpa-/-	Trial 35	0:07:14-0:07:15	9.10793
otpa-/-	Trial 35	0:07:15-0:07:16	6.75537
otpa-/-	Trial 35	0:07:16-0:07:17	8.04677
otpa-/-	Trial 35	0:07:17-0:07:18	9.04974
otpa-/-	Trial 35	0:07:18-0:07:19	5.4546
otpa-/-	Trial 35	0:07:19-0:07:20	9.46758
otpa-/-	Trial 35	0:07:20-0:07:21	9.03171
otpa-/-	Trial 35	0:07:21-0:07:22	9.21932
otpa-/-	Trial 35	0:07:22-0:07:23	8.06941
otpa-/-	Trial 35	0:07:23-0:07:24	8.44101
otpa-/-	Trial 35	0:07:24-0:07:25	7.6272
otpa-/-	Trial 35	0:07:25-0:07:26	9.18582
otpa-/-	Trial 35	0:07:26-0:07:27	16.0433
otpa-/-	Trial 35	0:07:27-0:07:28	15.0526
otpa-/-	Trial 35	0:07:28-0:07:29	12.2664
otpa-/-	Trial 35	0:07:29-0:07:30	11.3101
otpa-/-	Trial 35	0:07:30-0:07:31	9.76484
otpa-/-	Trial 35	0:07:31-0:07:32	10.4013
otpa-/-	Trial 35	0:07:32-0:07:33	7.59695
otpa-/-	Trial 35	0:07:33-0:07:34	8.2182
otpa-/-	Trial 35	0:07:34-0:07:35	15.0814
otpa-/-	Trial 35	0:07:35-0:07:36	13.2595
otpa-/-	Trial 35	0:07:36-0:07:37	8.31312
otpa-/-	Trial 35	0:07:37-0:07:38	9.74055
otpa-/-	Trial 35	0:07:38-0:07:39	5.74862
otpa-/-	Trial 35	0:07:39-0:07:40	5.22377
otpa-/-	Trial 35	0:07:40-0:07:41	8.3397
otpa-/-	Trial 35	0:07:41-0:07:42	6.40244
otpa-/-	Trial 35	0:07:42-0:07:43	6.81086
otpa-/-	Trial 35	0:07:43-0:07:44	6.50819
otpa-/-	Trial 35	0:07:44-0:07:45	14.5252
otpa-/-	Trial 35	0:07:45-0:07:46	13.5594
otpa-/-	Trial 35	0:07:46-0:07:47	8.55137
otpa-/-	Trial 35	0:07:47-0:07:48	8.27303
otpa-/-	Trial 35	0:07:48-0:07:49	5.99814
otpa-/-	Trial 35	0:07:49-0:07:50	5.8325
otpa-/-	Trial 35	0:07:50-0:07:51	6.7271
otpa-/-	Trial 35	0:07:51-0:07:52	4.57026
otpa-/-	Trial 35	0:07:52-0:07:53	9.55962
otpa-/-	Trial 35	0:07:53-0:07:54	13.1016
otpa-/-	Trial 35	0:07:54-0:07:55	9.21718
otpa-/-	Trial 35	0:07:55-0:07:56	11.3366
otpa-/-	Trial 35	0:07:56-0:07:57	14.8922
otpa-/-	Trial 35	0:07:57-0:07:58	11.0631
otpa-/-	Trial 35	0:07:58-0:07:59	9.15419
otpa-/-	Trial 35	0:07:59-0:08:00	12.7878
otpa-/-	Trial 35	0:08:00-0:08:01	13.4515
otpa-/-	Trial 35	0:08:01-0:08:02	14.539
otpa-/-	Trial 35	0:08:02-0:08:03	10.5889
otpa-/-	Trial 35	0:08:03-0:08:04	6.47618
otpa-/-	Trial 35	0:08:04-0:08:05	6.78953
otpa-/-	Trial 35	0:08:05-0:08:06	7.35778
otpa-/-	Trial 35	0:08:06-0:08:07	3.94519
otpa-/-	Trial 35	0:08:07-0:08:08	3.69278
otpa-/-	Trial 35	0:08:08-0:08:09	7.9848
otpa-/-	Trial 35	0:08:09-0:08:10	7.90165
otpa-/-	Trial 35	0:08:10-0:08:11	6.02342
otpa-/-	Trial 35	0:08:11-0:08:12	13.3196
otpa-/-	Trial 35	0:08:12-0:08:13	14.263
otpa-/-	Trial 35	0:08:13-0:08:14	15.2613
otpa-/-	Trial 35	0:08:14-0:08:15	14.9795
otpa-/-	Trial 35	0:08:15-0:08:16	16.2942
otpa-/-	Trial 35	0:08:16-0:08:17	4.87175
otpa-/-	Trial 35	0:08:17-0:08:18	10.561
otpa-/-	Trial 35	0:08:18-0:08:19	8.49264
otpa-/-	Trial 35	0:08:19-0:08:20	9.06579
otpa-/-	Trial 35	0:08:20-0:08:21	13.0366
otpa-/-	Trial 35	0:08:21-0:08:22	8.82177
otpa-/-	Trial 35	0:08:22-0:08:23	6.15127
otpa-/-	Trial 35	0:08:23-0:08:24	9.70502
otpa-/-	Trial 35	0:08:24-0:08:25	9.36249
otpa-/-	Trial 35	0:08:25-0:08:26	6.88991
otpa-/-	Trial 35	0:08:26-0:08:27	8.97597
otpa-/-	Trial 35	0:08:27-0:08:28	8.85159
otpa-/-	Trial 35	0:08:28-0:08:29	8.58875
otpa-/-	Trial 35	0:08:29-0:08:30	7.14662
otpa-/-	Trial 35	0:08:30-0:08:31	10.8702
otpa-/-	Trial 35	0:08:31-0:08:32	6.95414
otpa-/-	Trial 35	0:08:32-0:08:33	9.78275
otpa-/-	Trial 35	0:08:33-0:08:34	11.7009
otpa-/-	Trial 35	0:08:34-0:08:35	11.9939
otpa-/-	Trial 35	0:08:35-0:08:36	14.0635
otpa-/-	Trial 35	0:08:36-0:08:37	16.2078
otpa-/-	Trial 35	0:08:37-0:08:38	10.2747
otpa-/-	Trial 35	0:08:38-0:08:39	5.76138
otpa-/-	Trial 35	0:08:39-0:08:40	15.5307
otpa-/-	Trial 35	0:08:40-0:08:41	8.69067
otpa-/-	Trial 35	0:08:41-0:08:42	15.5145
otpa-/-	Trial 35	0:08:42-0:08:43	12.1593
otpa-/-	Trial 35	0:08:43-0:08:44	8.62385
otpa-/-	Trial 35	0:08:44-0:08:45	16.6556
otpa-/-	Trial 35	0:08:45-0:08:46	8.84765
otpa-/-	Trial 35	0:08:46-0:08:47	7.85988
otpa-/-	Trial 35	0:08:47-0:08:48	10.1237
otpa-/-	Trial 35	0:08:48-0:08:49	15.2059
otpa-/-	Trial 35	0:08:49-0:08:50	13.8619
otpa-/-	Trial 35	0:08:50-0:08:51	6.87551
otpa-/-	Trial 35	0:08:51-0:08:52	9.37065
otpa-/-	Trial 35	0:08:52-0:08:53	7.77539
otpa-/-	Trial 35	0:08:53-0:08:54	10.0768
otpa-/-	Trial 35	0:08:54-0:08:55	6.49529
otpa-/-	Trial 35	0:08:55-0:08:56	14.468
otpa-/-	Trial 35	0:08:56-0:08:57	11.5924
otpa-/-	Trial 35	0:08:57-0:08:58	11.3676
otpa-/-	Trial 35	0:08:58-0:08:59	14.7566
otpa-/-	Trial 35	0:08:59-0:09:00	9.98751
otpa-/-	Trial 35	0:09:00-0:09:01	9.77375
otpa-/-	Trial 35	0:09:01-0:09:02	8.92676
otpa-/-	Trial 35	0:09:02-0:09:03	6.10731
otpa-/-	Trial 35	0:09:03-0:09:04	12.3994
otpa-/-	Trial 35	0:09:04-0:09:05	8.95531
otpa-/-	Trial 35	0:09:05-0:09:06	8.70047
otpa-/-	Trial 35	0:09:06-0:09:07	6.7451
otpa-/-	Trial 35	0:09:07-0:09:08	5.7114
otpa-/-	Trial 35	0:09:08-0:09:09	6.91402
otpa-/-	Trial 35	0:09:09-0:09:10	8.1305
otpa-/-	Trial 35	0:09:10-0:09:11	6.81449
otpa-/-	Trial 35	0:09:11-0:09:12	7.2561
otpa-/-	Trial 35	0:09:12-0:09:13	13.4139
otpa-/-	Trial 35	0:09:13-0:09:14	11.3189
otpa-/-	Trial 35	0:09:14-0:09:15	9.25449
otpa-/-	Trial 35	0:09:15-0:09:16	7.9353
otpa-/-	Trial 35	0:09:16-0:09:17	7.00896
otpa-/-	Trial 35	0:09:17-0:09:18	7.61565
otpa-/-	Trial 35	0:09:18-0:09:19	7.95163
otpa-/-	Trial 35	0:09:19-0:09:20	10.3236
otpa-/-	Trial 35	0:09:20-0:09:21	9.96046
otpa-/-	Trial 35	0:09:21-0:09:22	6.35935
otpa-/-	Trial 35	0:09:22-0:09:23	4.90213
otpa-/-	Trial 35	0:09:23-0:09:24	7.66938
otpa-/-	Trial 35	0:09:24-0:09:25	8.66444
otpa-/-	Trial 35	0:09:25-0:09:26	5.24338
otpa-/-	Trial 35	0:09:26-0:09:27	9.65959
otpa-/-	Trial 35	0:09:27-0:09:28	9.59938
otpa-/-	Trial 35	0:09:28-0:09:29	8.278
otpa-/-	Trial 35	0:09:29-0:09:30	10.0764
otpa-/-	Trial 35	0:09:30-0:09:31	5.08827
otpa-/-	Trial 35	0:09:31-0:09:32	10.1231
otpa-/-	Trial 35	0:09:32-0:09:33	8.53426
otpa-/-	Trial 35	0:09:33-0:09:34	9.65578
otpa-/-	Trial 35	0:09:34-0:09:35	18.2038
otpa-/-	Trial 35	0:09:35-0:09:36	9.95229
otpa-/-	Trial 35	0:09:36-0:09:37	7.99924
otpa-/-	Trial 35	0:09:37-0:09:38	9.43847
otpa-/-	Trial 35	0:09:38-0:09:39	11.7659
otpa-/-	Trial 35	0:09:39-0:09:40	12.3925
otpa-/-	Trial 35	0:09:40-0:09:41	10.3311
otpa-/-	Trial 35	0:09:41-0:09:42	7.83228
otpa-/-	Trial 35	0:09:42-0:09:43	8.52573
otpa-/-	Trial 35	0:09:43-0:09:44	8.53406
otpa-/-	Trial 35	0:09:44-0:09:45	17.2703
otpa-/-	Trial 35	0:09:45-0:09:46	12.2602
otpa-/-	Trial 35	0:09:46-0:09:47	13.2143
otpa-/-	Trial 35	0:09:47-0:09:48	9.86184
otpa-/-	Trial 35	0:09:48-0:09:49	9.95105
otpa-/-	Trial 35	0:09:49-0:09:50	8.21974
otpa-/-	Trial 35	0:09:50-0:09:51	3.88483
otpa-/-	Trial 35	0:09:51-0:09:52	5.61434
otpa-/-	Trial 35	0:09:52-0:09:53	4.93436
otpa-/-	Trial 35	0:09:53-0:09:54	9.47454
otpa-/-	Trial 35	0:09:54-0:09:55	7.51481
otpa-/-	Trial 35	0:09:55-0:09:56	9.04412
otpa-/-	Trial 35	0:09:56-0:09:57	8.72961
otpa-/-	Trial 35	0:09:57-0:09:58	11.9296
otpa-/-	Trial 35	0:09:58-0:09:59	8.01265
otpa-/-	Trial 35	0:09:59-0:10:00	7.95765
otpa-/-	Trial 35	0:10:00-0:10:01	8.47096
otpa-/-	Trial 36	Start-0:00:01	11.5152
otpa-/-	Trial 36	0:00:01-0:00:02	16.1045
otpa-/-	Trial 36	0:00:02-0:00:03	16.1318
otpa-/-	Trial 36	0:00:03-0:00:04	19.5189
otpa-/-	Trial 36	0:00:04-0:00:05	14.4327
otpa-/-	Trial 36	0:00:05-0:00:06	7.17244
otpa-/-	Trial 36	0:00:06-0:00:07	5.93869
otpa-/-	Trial 36	0:00:07-0:00:08	8.02365
otpa-/-	Trial 36	0:00:08-0:00:09	6.41943
otpa-/-	Trial 36	0:00:09-0:00:10	12.636
otpa-/-	Trial 36	0:00:10-0:00:11	8.50081
otpa-/-	Trial 36	0:00:11-0:00:12	5.69094
otpa-/-	Trial 36	0:00:12-0:00:13	9.45715
otpa-/-	Trial 36	0:00:13-0:00:14	11.6462
otpa-/-	Trial 36	0:00:14-0:00:15	16.0457
otpa-/-	Trial 36	0:00:15-0:00:16	9.07187
otpa-/-	Trial 36	0:00:16-0:00:17	8
otpa-/-	Trial 36	0:00:17-0:00:18	8.06858
otpa-/-	Trial 36	0:00:18-0:00:19	5.68245
otpa-/-	Trial 36	0:00:19-0:00:20	4.81805
otpa-/-	Trial 36	0:00:20-0:00:21	11.7158
otpa-/-	Trial 36	0:00:21-0:00:22	5.4345
otpa-/-	Trial 36	0:00:22-0:00:23	13.8389
otpa-/-	Trial 36	0:00:23-0:00:24	8.42081
otpa-/-	Trial 36	0:00:24-0:00:25	7.64327
otpa-/-	Trial 36	0:00:25-0:00:26	5.29372
otpa-/-	Trial 36	0:00:26-0:00:27	9.03605
otpa-/-	Trial 36	0:00:27-0:00:28	7.8107
otpa-/-	Trial 36	0:00:28-0:00:29	5.67398
otpa-/-	Trial 36	0:00:29-0:00:30	8.55624
otpa-/-	Trial 36	0:00:30-0:00:31	6.13793
otpa-/-	Trial 36	0:00:31-0:00:32	7.30138
otpa-/-	Trial 36	0:00:32-0:00:33	5.68944
otpa-/-	Trial 36	0:00:33-0:00:34	7.06059
otpa-/-	Trial 36	0:00:34-0:00:35	10.1573
otpa-/-	Trial 36	0:00:35-0:00:36	11.4141
otpa-/-	Trial 36	0:00:36-0:00:37	16.9896
otpa-/-	Trial 36	0:00:37-0:00:38	4.10857
otpa-/-	Trial 36	0:00:38-0:00:39	3.0091
otpa-/-	Trial 36	0:00:39-0:00:40	7.37548
otpa-/-	Trial 36	0:00:40-0:00:41	8.1198
otpa-/-	Trial 36	0:00:41-0:00:42	6.89177
otpa-/-	Trial 36	0:00:42-0:00:43	6.38103
otpa-/-	Trial 36	0:00:43-0:00:44	8.42435
otpa-/-	Trial 36	0:00:44-0:00:45	9.89507
otpa-/-	Trial 36	0:00:45-0:00:46	4.81022
otpa-/-	Trial 36	0:00:46-0:00:47	9.35417
otpa-/-	Trial 36	0:00:47-0:00:48	7.54313
otpa-/-	Trial 36	0:00:48-0:00:49	9.00132
otpa-/-	Trial 36	0:00:49-0:00:50	7.61794
otpa-/-	Trial 36	0:00:50-0:00:51	7.49404
otpa-/-	Trial 36	0:00:51-0:00:52	6.24596
otpa-/-	Trial 36	0:00:52-0:00:53	9.47179
otpa-/-	Trial 36	0:00:53-0:00:54	7.22716
otpa-/-	Trial 36	0:00:54-0:00:55	4.54766
otpa-/-	Trial 36	0:00:55-0:00:56	7.84004
otpa-/-	Trial 36	0:00:56-0:00:57	6.75241
otpa-/-	Trial 36	0:00:57-0:00:58	6.35673
otpa-/-	Trial 36	0:00:58-0:00:59	7.22264
otpa-/-	Trial 36	0:00:59-0:01:00	6.48217
otpa-/-	Trial 36	0:01:00-0:01:01	7.9992
otpa-/-	Trial 36	0:01:01-0:01:02	6.88787
otpa-/-	Trial 36	0:01:02-0:01:03	6.07703
otpa-/-	Trial 36	0:01:03-0:01:04	5.51048
otpa-/-	Trial 36	0:01:04-0:01:05	7.82311
otpa-/-	Trial 36	0:01:05-0:01:06	5.54089
otpa-/-	Trial 36	0:01:06-0:01:07	7.14151
otpa-/-	Trial 36	0:01:07-0:01:08	7.07426
otpa-/-	Trial 36	0:01:08-0:01:09	5.70937
otpa-/-	Trial 36	0:01:09-0:01:10	5.75253
otpa-/-	Trial 36	0:01:10-0:01:11	9.96069
otpa-/-	Trial 36	0:01:11-0:01:12	9.1491
otpa-/-	Trial 36	0:01:12-0:01:13	4.03443
otpa-/-	Trial 36	0:01:13-0:01:14	10.6392
otpa-/-	Trial 36	0:01:14-0:01:15	7.51977
otpa-/-	Trial 36	0:01:15-0:01:16	9.53359
otpa-/-	Trial 36	0:01:16-0:01:17	6.20037
otpa-/-	Trial 36	0:01:17-0:01:18	5.06957
otpa-/-	Trial 36	0:01:18-0:01:19	4.52608
otpa-/-	Trial 36	0:01:19-0:01:20	5.52315
otpa-/-	Trial 36	0:01:20-0:01:21	3.6453
otpa-/-	Trial 36	0:01:21-0:01:22	13.047
otpa-/-	Trial 36	0:01:22-0:01:23	9.22742
otpa-/-	Trial 36	0:01:23-0:01:24	4.29219
otpa-/-	Trial 36	0:01:24-0:01:25	5.67554
otpa-/-	Trial 36	0:01:25-0:01:26	8.26559
otpa-/-	Trial 36	0:01:26-0:01:27	8.50206
otpa-/-	Trial 36	0:01:27-0:01:28	6.20327
otpa-/-	Trial 36	0:01:28-0:01:29	5.94287
otpa-/-	Trial 36	0:01:29-0:01:30	8.6574
otpa-/-	Trial 36	0:01:30-0:01:31	7.26961
otpa-/-	Trial 36	0:01:31-0:01:32	8.76614
otpa-/-	Trial 36	0:01:32-0:01:33	4.83138
otpa-/-	Trial 36	0:01:33-0:01:34	6.0947
otpa-/-	Trial 36	0:01:34-0:01:35	11.9942
otpa-/-	Trial 36	0:01:35-0:01:36	7.34471
otpa-/-	Trial 36	0:01:36-0:01:37	6.17422
otpa-/-	Trial 36	0:01:37-0:01:38	8.0762
otpa-/-	Trial 36	0:01:38-0:01:39	9.73164
otpa-/-	Trial 36	0:01:39-0:01:40	8.67112
otpa-/-	Trial 36	0:01:40-0:01:41	9.24441
otpa-/-	Trial 36	0:01:41-0:01:42	3.98543
otpa-/-	Trial 36	0:01:42-0:01:43	1.30489
otpa-/-	Trial 36	0:01:43-0:01:44	1.78449
otpa-/-	Trial 36	0:01:44-0:01:45	7.12834
otpa-/-	Trial 36	0:01:45-0:01:46	4.68967
otpa-/-	Trial 36	0:01:46-0:01:47	9.2937
otpa-/-	Trial 36	0:01:47-0:01:48	7.88827
otpa-/-	Trial 36	0:01:48-0:01:49	7.85535
otpa-/-	Trial 36	0:01:49-0:01:50	6.81772
otpa-/-	Trial 36	0:01:50-0:01:51	8.4242
otpa-/-	Trial 36	0:01:51-0:01:52	7.94762
otpa-/-	Trial 36	0:01:52-0:01:53	7.98257
otpa-/-	Trial 36	0:01:53-0:01:54	13.9335
otpa-/-	Trial 36	0:01:54-0:01:55	7.29335
otpa-/-	Trial 36	0:01:55-0:01:56	8.10752
otpa-/-	Trial 36	0:01:56-0:01:57	9.1196
otpa-/-	Trial 36	0:01:57-0:01:58	7.32386
otpa-/-	Trial 36	0:01:58-0:01:59	8.1969
otpa-/-	Trial 36	0:01:59-0:02:00	9.51575
otpa-/-	Trial 36	0:02:00-0:02:01	10.5687
otpa-/-	Trial 36	0:02:01-0:02:02	9.79863
otpa-/-	Trial 36	0:02:02-0:02:03	5.49112
otpa-/-	Trial 36	0:02:03-0:02:04	8.38399
otpa-/-	Trial 36	0:02:04-0:02:05	8.67886
otpa-/-	Trial 36	0:02:05-0:02:06	9.77416
otpa-/-	Trial 36	0:02:06-0:02:07	9.04097
otpa-/-	Trial 36	0:02:07-0:02:08	7.55478
otpa-/-	Trial 36	0:02:08-0:02:09	10.1109
otpa-/-	Trial 36	0:02:09-0:02:10	8.21879
otpa-/-	Trial 36	0:02:10-0:02:11	8.76643
otpa-/-	Trial 36	0:02:11-0:02:12	7.00858
otpa-/-	Trial 36	0:02:12-0:02:13	6.14091
otpa-/-	Trial 36	0:02:13-0:02:14	12.0387
otpa-/-	Trial 36	0:02:14-0:02:15	7.30076
otpa-/-	Trial 36	0:02:15-0:02:16	10.5351
otpa-/-	Trial 36	0:02:16-0:02:17	10.2498
otpa-/-	Trial 36	0:02:17-0:02:18	5.4578
otpa-/-	Trial 36	0:02:18-0:02:19	11.9161
otpa-/-	Trial 36	0:02:19-0:02:20	10.5856
otpa-/-	Trial 36	0:02:20-0:02:21	7.33617
otpa-/-	Trial 36	0:02:21-0:02:22	4.39493
otpa-/-	Trial 36	0:02:22-0:02:23	8.45809
otpa-/-	Trial 36	0:02:23-0:02:24	9.62287
otpa-/-	Trial 36	0:02:24-0:02:25	12.9457
otpa-/-	Trial 36	0:02:25-0:02:26	13.897
otpa-/-	Trial 36	0:02:26-0:02:27	5.96097
otpa-/-	Trial 36	0:02:27-0:02:28	9.41558
otpa-/-	Trial 36	0:02:28-0:02:29	10.7375
otpa-/-	Trial 36	0:02:29-0:02:30	8.34639
otpa-/-	Trial 36	0:02:30-0:02:31	13.5979
otpa-/-	Trial 36	0:02:31-0:02:32	5.97204
otpa-/-	Trial 36	0:02:32-0:02:33	6.82623
otpa-/-	Trial 36	0:02:33-0:02:34	13.3507
otpa-/-	Trial 36	0:02:34-0:02:35	10.1956
otpa-/-	Trial 36	0:02:35-0:02:36	11.3896
otpa-/-	Trial 36	0:02:36-0:02:37	14.2189
otpa-/-	Trial 36	0:02:37-0:02:38	7.41067
otpa-/-	Trial 36	0:02:38-0:02:39	7.40671
otpa-/-	Trial 36	0:02:39-0:02:40	15.3598
otpa-/-	Trial 36	0:02:40-0:02:41	7.14688
otpa-/-	Trial 36	0:02:41-0:02:42	12.1544
otpa-/-	Trial 36	0:02:42-0:02:43	11.0198
otpa-/-	Trial 36	0:02:43-0:02:44	7.03792
otpa-/-	Trial 36	0:02:44-0:02:45	10.5903
otpa-/-	Trial 36	0:02:45-0:02:46	6.32992
otpa-/-	Trial 36	0:02:46-0:02:47	3.83788
otpa-/-	Trial 36	0:02:47-0:02:48	4.285
otpa-/-	Trial 36	0:02:48-0:02:49	7.0499
otpa-/-	Trial 36	0:02:49-0:02:50	10.394
otpa-/-	Trial 36	0:02:50-0:02:51	14.2952
otpa-/-	Trial 36	0:02:51-0:02:52	6.81981
otpa-/-	Trial 36	0:02:52-0:02:53	9.56902
otpa-/-	Trial 36	0:02:53-0:02:54	10.6745
otpa-/-	Trial 36	0:02:54-0:02:55	8.55033
otpa-/-	Trial 36	0:02:55-0:02:56	6.09158
otpa-/-	Trial 36	0:02:56-0:02:57	10.8609
otpa-/-	Trial 36	0:02:57-0:02:58	8.5183
otpa-/-	Trial 36	0:02:58-0:02:59	10.0475
otpa-/-	Trial 36	0:02:59-0:03:00	8.69493
otpa-/-	Trial 36	0:03:00-0:03:01	10.3348
otpa-/-	Trial 36	0:03:01-0:03:02	7.2898
otpa-/-	Trial 36	0:03:02-0:03:03	11.8436
otpa-/-	Trial 36	0:03:03-0:03:04	12.0138
otpa-/-	Trial 36	0:03:04-0:03:05	11.6177
otpa-/-	Trial 36	0:03:05-0:03:06	11.7362
otpa-/-	Trial 36	0:03:06-0:03:07	4.69816
otpa-/-	Trial 36	0:03:07-0:03:08	4.78766
otpa-/-	Trial 36	0:03:08-0:03:09	10.0944
otpa-/-	Trial 36	0:03:09-0:03:10	7.1178
otpa-/-	Trial 36	0:03:10-0:03:11	8.99483
otpa-/-	Trial 36	0:03:11-0:03:12	9.77468
otpa-/-	Trial 36	0:03:12-0:03:13	8.02599
otpa-/-	Trial 36	0:03:13-0:03:14	15.1344
otpa-/-	Trial 36	0:03:14-0:03:15	9.04934
otpa-/-	Trial 36	0:03:15-0:03:16	6.9288
otpa-/-	Trial 36	0:03:16-0:03:17	9.24101
otpa-/-	Trial 36	0:03:17-0:03:18	8.24831
otpa-/-	Trial 36	0:03:18-0:03:19	13.9049
otpa-/-	Trial 36	0:03:19-0:03:20	10.1117
otpa-/-	Trial 36	0:03:20-0:03:21	12.4952
otpa-/-	Trial 36	0:03:21-0:03:22	10.4526
otpa-/-	Trial 36	0:03:22-0:03:23	14.0834
otpa-/-	Trial 36	0:03:23-0:03:24	8.90587
otpa-/-	Trial 36	0:03:24-0:03:25	12.089
otpa-/-	Trial 36	0:03:25-0:03:26	16.0705
otpa-/-	Trial 36	0:03:26-0:03:27	10.9165
otpa-/-	Trial 36	0:03:27-0:03:28	13.7984
otpa-/-	Trial 36	0:03:28-0:03:29	6.64288
otpa-/-	Trial 36	0:03:29-0:03:30	11.437
otpa-/-	Trial 36	0:03:30-0:03:31	8.35975
otpa-/-	Trial 36	0:03:31-0:03:32	10.9003
otpa-/-	Trial 36	0:03:32-0:03:33	9.03925
otpa-/-	Trial 36	0:03:33-0:03:34	6.88661
otpa-/-	Trial 36	0:03:34-0:03:35	4.49675
otpa-/-	Trial 36	0:03:35-0:03:36	12.7713
otpa-/-	Trial 36	0:03:36-0:03:37	2.27165
otpa-/-	Trial 36	0:03:37-0:03:38	11.7713
otpa-/-	Trial 36	0:03:38-0:03:39	9.02312
otpa-/-	Trial 36	0:03:39-0:03:40	6.06777
otpa-/-	Trial 36	0:03:40-0:03:41	13.4472
otpa-/-	Trial 36	0:03:41-0:03:42	12.8153
otpa-/-	Trial 36	0:03:42-0:03:43	10.1007
otpa-/-	Trial 36	0:03:43-0:03:44	6.48196
otpa-/-	Trial 36	0:03:44-0:03:45	6.47358
otpa-/-	Trial 36	0:03:45-0:03:46	12.733
otpa-/-	Trial 36	0:03:46-0:03:47	11.2733
otpa-/-	Trial 36	0:03:47-0:03:48	13.154
otpa-/-	Trial 36	0:03:48-0:03:49	15.0914
otpa-/-	Trial 36	0:03:49-0:03:50	7.79023
otpa-/-	Trial 36	0:03:50-0:03:51	13.6309
otpa-/-	Trial 36	0:03:51-0:03:52	7.04431
otpa-/-	Trial 36	0:03:52-0:03:53	13.5726
otpa-/-	Trial 36	0:03:53-0:03:54	11.277
otpa-/-	Trial 36	0:03:54-0:03:55	6.78701
otpa-/-	Trial 36	0:03:55-0:03:56	6.00697
otpa-/-	Trial 36	0:03:56-0:03:57	5.57048
otpa-/-	Trial 36	0:03:57-0:03:58	4.22291
otpa-/-	Trial 36	0:03:58-0:03:59	6.8305
otpa-/-	Trial 36	0:03:59-0:04:00	6.5209
otpa-/-	Trial 36	0:04:00-0:04:01	5.52273
otpa-/-	Trial 36	0:04:01-0:04:02	13.5089
otpa-/-	Trial 36	0:04:02-0:04:03	15.7823
otpa-/-	Trial 36	0:04:03-0:04:04	10.2729
otpa-/-	Trial 36	0:04:04-0:04:05	7.52936
otpa-/-	Trial 36	0:04:05-0:04:06	10.4087
otpa-/-	Trial 36	0:04:06-0:04:07	12.3761
otpa-/-	Trial 36	0:04:07-0:04:08	11.2066
otpa-/-	Trial 36	0:04:08-0:04:09	16.8899
otpa-/-	Trial 36	0:04:09-0:04:10	8.79254
otpa-/-	Trial 36	0:04:10-0:04:11	6.9222
otpa-/-	Trial 36	0:04:11-0:04:12	12.3961
otpa-/-	Trial 36	0:04:12-0:04:13	6.24742
otpa-/-	Trial 36	0:04:13-0:04:14	11.0868
otpa-/-	Trial 36	0:04:14-0:04:15	3.84503
otpa-/-	Trial 36	0:04:15-0:04:16	14.1032
otpa-/-	Trial 36	0:04:16-0:04:17	9.90553
otpa-/-	Trial 36	0:04:17-0:04:18	11.3952
otpa-/-	Trial 36	0:04:18-0:04:19	7.10221
otpa-/-	Trial 36	0:04:19-0:04:20	8.93905
otpa-/-	Trial 36	0:04:20-0:04:21	14.8662
otpa-/-	Trial 36	0:04:21-0:04:22	9.61561
otpa-/-	Trial 36	0:04:22-0:04:23	7.8965
otpa-/-	Trial 36	0:04:23-0:04:24	10.6065
otpa-/-	Trial 36	0:04:24-0:04:25	13.1277
otpa-/-	Trial 36	0:04:25-0:04:26	13.4248
otpa-/-	Trial 36	0:04:26-0:04:27	8.05309
otpa-/-	Trial 36	0:04:27-0:04:28	12.9011
otpa-/-	Trial 36	0:04:28-0:04:29	3.04723
otpa-/-	Trial 36	0:04:29-0:04:30	10.5353
otpa-/-	Trial 36	0:04:30-0:04:31	11.5731
otpa-/-	Trial 36	0:04:31-0:04:32	11.6817
otpa-/-	Trial 36	0:04:32-0:04:33	5.94148
otpa-/-	Trial 36	0:04:33-0:04:34	13.4403
otpa-/-	Trial 36	0:04:34-0:04:35	9.03027
otpa-/-	Trial 36	0:04:35-0:04:36	8.72721
otpa-/-	Trial 36	0:04:36-0:04:37	8.3614
otpa-/-	Trial 36	0:04:37-0:04:38	12.8164
otpa-/-	Trial 36	0:04:38-0:04:39	9.49627
otpa-/-	Trial 36	0:04:39-0:04:40	12.6729
otpa-/-	Trial 36	0:04:40-0:04:41	11.7267
otpa-/-	Trial 36	0:04:41-0:04:42	13.6015
otpa-/-	Trial 36	0:04:42-0:04:43	5.74896
otpa-/-	Trial 36	0:04:43-0:04:44	8.48989
otpa-/-	Trial 36	0:04:44-0:04:45	13.7914
otpa-/-	Trial 36	0:04:45-0:04:46	13.5056
otpa-/-	Trial 36	0:04:46-0:04:47	6.45751
otpa-/-	Trial 36	0:04:47-0:04:48	17.2127
otpa-/-	Trial 36	0:04:48-0:04:49	13.9715
otpa-/-	Trial 36	0:04:49-0:04:50	7.20427
otpa-/-	Trial 36	0:04:50-0:04:51	4.88725
otpa-/-	Trial 36	0:04:51-0:04:52	2.41845
otpa-/-	Trial 36	0:04:52-0:04:53	3.88476
otpa-/-	Trial 36	0:04:53-0:04:54	4.27231
otpa-/-	Trial 36	0:04:54-0:04:55	13.6175
otpa-/-	Trial 36	0:04:55-0:04:56	9.85331
otpa-/-	Trial 36	0:04:56-0:04:57	4.79201
otpa-/-	Trial 36	0:04:57-0:04:58	11.5157
otpa-/-	Trial 36	0:04:58-0:04:59	7.75203
otpa-/-	Trial 36	0:04:59-0:05:00	10.5992
otpa-/-	Trial 36	0:05:00-0:05:01	9.47255
otpa-/-	Trial 36	0:05:01-0:05:02	12.0653
otpa-/-	Trial 36	0:05:02-0:05:03	13.0973
otpa-/-	Trial 36	0:05:03-0:05:04	13.6585
otpa-/-	Trial 36	0:05:04-0:05:05	13.7134
otpa-/-	Trial 36	0:05:05-0:05:06	9.4966
otpa-/-	Trial 36	0:05:06-0:05:07	13.4104
otpa-/-	Trial 36	0:05:07-0:05:08	9.7098
otpa-/-	Trial 36	0:05:08-0:05:09	14.593
otpa-/-	Trial 36	0:05:09-0:05:10	6.33039
otpa-/-	Trial 36	0:05:10-0:05:11	13.4692
otpa-/-	Trial 36	0:05:11-0:05:12	12.414
otpa-/-	Trial 36	0:05:12-0:05:13	9.55249
otpa-/-	Trial 36	0:05:13-0:05:14	10.0095
otpa-/-	Trial 36	0:05:14-0:05:15	14.8766
otpa-/-	Trial 36	0:05:15-0:05:16	8.55025
otpa-/-	Trial 36	0:05:16-0:05:17	13.1959
otpa-/-	Trial 36	0:05:17-0:05:18	9.51293
otpa-/-	Trial 36	0:05:18-0:05:19	11.342
otpa-/-	Trial 36	0:05:19-0:05:20	13.6965
otpa-/-	Trial 36	0:05:20-0:05:21	5.41741
otpa-/-	Trial 36	0:05:21-0:05:22	10.4853
otpa-/-	Trial 36	0:05:22-0:05:23	7.48155
otpa-/-	Trial 36	0:05:23-0:05:24	13.6648
otpa-/-	Trial 36	0:05:24-0:05:25	4.96599
otpa-/-	Trial 36	0:05:25-0:05:26	14.8161
otpa-/-	Trial 36	0:05:26-0:05:27	6.49741
otpa-/-	Trial 36	0:05:27-0:05:28	14.4418
otpa-/-	Trial 36	0:05:28-0:05:29	5.51888
otpa-/-	Trial 36	0:05:29-0:05:30	11.3989
otpa-/-	Trial 36	0:05:30-0:05:31	5.88362
otpa-/-	Trial 36	0:05:31-0:05:32	14.5259
otpa-/-	Trial 36	0:05:32-0:05:33	5.0029
otpa-/-	Trial 36	0:05:33-0:05:34	14.0676
otpa-/-	Trial 36	0:05:34-0:05:35	16.7054
otpa-/-	Trial 36	0:05:35-0:05:36	10.2699
otpa-/-	Trial 36	0:05:36-0:05:37	3.40372
otpa-/-	Trial 36	0:05:37-0:05:38	4.01522
otpa-/-	Trial 36	0:05:38-0:05:39	3.67363
otpa-/-	Trial 36	0:05:39-0:05:40	3.12944
otpa-/-	Trial 36	0:05:40-0:05:41	4.09768
otpa-/-	Trial 36	0:05:41-0:05:42	6.79656
otpa-/-	Trial 36	0:05:42-0:05:43	10.1712
otpa-/-	Trial 36	0:05:43-0:05:44	7.90357
otpa-/-	Trial 36	0:05:44-0:05:45	4.77009
otpa-/-	Trial 36	0:05:45-0:05:46	14.9286
otpa-/-	Trial 36	0:05:46-0:05:47	12.2326
otpa-/-	Trial 36	0:05:47-0:05:48	14.8367
otpa-/-	Trial 36	0:05:48-0:05:49	5.70622
otpa-/-	Trial 36	0:05:49-0:05:50	8.86653
otpa-/-	Trial 36	0:05:50-0:05:51	14.3695
otpa-/-	Trial 36	0:05:51-0:05:52	11.368
otpa-/-	Trial 36	0:05:52-0:05:53	10.7019
otpa-/-	Trial 36	0:05:53-0:05:54	7.26022
otpa-/-	Trial 36	0:05:54-0:05:55	8.26219
otpa-/-	Trial 36	0:05:55-0:05:56	10.5606
otpa-/-	Trial 36	0:05:56-0:05:57	12.3684
otpa-/-	Trial 36	0:05:57-0:05:58	14.9189
otpa-/-	Trial 36	0:05:58-0:05:59	9.18229
otpa-/-	Trial 36	0:05:59-0:06:00	7.98396
otpa-/-	Trial 36	0:06:00-0:06:01	10.8164
otpa-/-	Trial 36	0:06:01-0:06:02	11.6778
otpa-/-	Trial 36	0:06:02-0:06:03	10.626
otpa-/-	Trial 36	0:06:03-0:06:04	13.5171
otpa-/-	Trial 36	0:06:04-0:06:05	7.88457
otpa-/-	Trial 36	0:06:05-0:06:06	8.72239
otpa-/-	Trial 36	0:06:06-0:06:07	11.942
otpa-/-	Trial 36	0:06:07-0:06:08	5.76148
otpa-/-	Trial 36	0:06:08-0:06:09	5.58914
otpa-/-	Trial 36	0:06:09-0:06:10	6.96087
otpa-/-	Trial 36	0:06:10-0:06:11	13.551
otpa-/-	Trial 36	0:06:11-0:06:12	9.1075
otpa-/-	Trial 36	0:06:12-0:06:13	7.88423
otpa-/-	Trial 36	0:06:13-0:06:14	7.76786
otpa-/-	Trial 36	0:06:14-0:06:15	9.18693
otpa-/-	Trial 36	0:06:15-0:06:16	9.69323
otpa-/-	Trial 36	0:06:16-0:06:17	6.35437
otpa-/-	Trial 36	0:06:17-0:06:18	13.2833
otpa-/-	Trial 36	0:06:18-0:06:19	7.29044
otpa-/-	Trial 36	0:06:19-0:06:20	5.63658
otpa-/-	Trial 36	0:06:20-0:06:21	7.25395
otpa-/-	Trial 36	0:06:21-0:06:22	11.2486
otpa-/-	Trial 36	0:06:22-0:06:23	10.3187
otpa-/-	Trial 36	0:06:23-0:06:24	10.3822
otpa-/-	Trial 36	0:06:24-0:06:25	9.86615
otpa-/-	Trial 36	0:06:25-0:06:26	13.4283
otpa-/-	Trial 36	0:06:26-0:06:27	11.4639
otpa-/-	Trial 36	0:06:27-0:06:28	9.67979
otpa-/-	Trial 36	0:06:28-0:06:29	11.7426
otpa-/-	Trial 36	0:06:29-0:06:30	9.07712
otpa-/-	Trial 36	0:06:30-0:06:31	1.46279
otpa-/-	Trial 36	0:06:31-0:06:32	8.18236
otpa-/-	Trial 36	0:06:32-0:06:33	15.291
otpa-/-	Trial 36	0:06:33-0:06:34	10.9245
otpa-/-	Trial 36	0:06:34-0:06:35	9.66569
otpa-/-	Trial 36	0:06:35-0:06:36	15.0133
otpa-/-	Trial 36	0:06:36-0:06:37	12.2191
otpa-/-	Trial 36	0:06:37-0:06:38	14.5114
otpa-/-	Trial 36	0:06:38-0:06:39	9.8943
otpa-/-	Trial 36	0:06:39-0:06:40	9.39961
otpa-/-	Trial 36	0:06:40-0:06:41	11.1619
otpa-/-	Trial 36	0:06:41-0:06:42	5.28453
otpa-/-	Trial 36	0:06:42-0:06:43	12.6611
otpa-/-	Trial 36	0:06:43-0:06:44	10.1506
otpa-/-	Trial 36	0:06:44-0:06:45	7.49399
otpa-/-	Trial 36	0:06:45-0:06:46	9.477
otpa-/-	Trial 36	0:06:46-0:06:47	7.7383
otpa-/-	Trial 36	0:06:47-0:06:48	13.047
otpa-/-	Trial 36	0:06:48-0:06:49	16.8449
otpa-/-	Trial 36	0:06:49-0:06:50	8.58386
otpa-/-	Trial 36	0:06:50-0:06:51	6.16258
otpa-/-	Trial 36	0:06:51-0:06:52	9.45036
otpa-/-	Trial 36	0:06:52-0:06:53	10.3068
otpa-/-	Trial 36	0:06:53-0:06:54	15.0523
otpa-/-	Trial 36	0:06:54-0:06:55	11.9819
otpa-/-	Trial 36	0:06:55-0:06:56	10.5866
otpa-/-	Trial 36	0:06:56-0:06:57	13.2906
otpa-/-	Trial 36	0:06:57-0:06:58	11.344
otpa-/-	Trial 36	0:06:58-0:06:59	12.3207
otpa-/-	Trial 36	0:06:59-0:07:00	14.9386
otpa-/-	Trial 36	0:07:00-0:07:01	9.56408
otpa-/-	Trial 36	0:07:01-0:07:02	14.2506
otpa-/-	Trial 36	0:07:02-0:07:03	17.5561
otpa-/-	Trial 36	0:07:03-0:07:04	10.0994
otpa-/-	Trial 36	0:07:04-0:07:05	15.1996
otpa-/-	Trial 36	0:07:05-0:07:06	10.4247
otpa-/-	Trial 36	0:07:06-0:07:07	6.6017
otpa-/-	Trial 36	0:07:07-0:07:08	7.92104
otpa-/-	Trial 36	0:07:08-0:07:09	13.0902
otpa-/-	Trial 36	0:07:09-0:07:10	10.8332
otpa-/-	Trial 36	0:07:10-0:07:11	6.20117
otpa-/-	Trial 36	0:07:11-0:07:12	11.2687
otpa-/-	Trial 36	0:07:12-0:07:13	13.5603
otpa-/-	Trial 36	0:07:13-0:07:14	8.97364
otpa-/-	Trial 36	0:07:14-0:07:15	10.7243
otpa-/-	Trial 36	0:07:15-0:07:16	12.5595
otpa-/-	Trial 36	0:07:16-0:07:17	9.71903
otpa-/-	Trial 36	0:07:17-0:07:18	11.9555
otpa-/-	Trial 36	0:07:18-0:07:19	16.1121
otpa-/-	Trial 36	0:07:19-0:07:20	13.267
otpa-/-	Trial 36	0:07:20-0:07:21	11.1459
otpa-/-	Trial 36	0:07:21-0:07:22	5.75624
otpa-/-	Trial 36	0:07:22-0:07:23	9.80745
otpa-/-	Trial 36	0:07:23-0:07:24	8.78979
otpa-/-	Trial 36	0:07:24-0:07:25	5.75872
otpa-/-	Trial 36	0:07:25-0:07:26	4.75414
otpa-/-	Trial 36	0:07:26-0:07:27	17.9071
otpa-/-	Trial 36	0:07:27-0:07:28	8.33642
otpa-/-	Trial 36	0:07:28-0:07:29	10.4004
otpa-/-	Trial 36	0:07:29-0:07:30	7.53225
otpa-/-	Trial 36	0:07:30-0:07:31	10.3829
otpa-/-	Trial 36	0:07:31-0:07:32	15.536
otpa-/-	Trial 36	0:07:32-0:07:33	7.98973
otpa-/-	Trial 36	0:07:33-0:07:34	14.5223
otpa-/-	Trial 36	0:07:34-0:07:35	8.18668
otpa-/-	Trial 36	0:07:35-0:07:36	8.50487
otpa-/-	Trial 36	0:07:36-0:07:37	7.01746
otpa-/-	Trial 36	0:07:37-0:07:38	8.2054
otpa-/-	Trial 36	0:07:38-0:07:39	11.313
otpa-/-	Trial 36	0:07:39-0:07:40	8.49607
otpa-/-	Trial 36	0:07:40-0:07:41	15.576
otpa-/-	Trial 36	0:07:41-0:07:42	12.707
otpa-/-	Trial 36	0:07:42-0:07:43	10.4422
otpa-/-	Trial 36	0:07:43-0:07:44	13.0329
otpa-/-	Trial 36	0:07:44-0:07:45	14.0223
otpa-/-	Trial 36	0:07:45-0:07:46	10.8182
otpa-/-	Trial 36	0:07:46-0:07:47	13.5986
otpa-/-	Trial 36	0:07:47-0:07:48	16.0571
otpa-/-	Trial 36	0:07:48-0:07:49	15.0408
otpa-/-	Trial 36	0:07:49-0:07:50	13.5632
otpa-/-	Trial 36	0:07:50-0:07:51	12.186
otpa-/-	Trial 36	0:07:51-0:07:52	10.8411
otpa-/-	Trial 36	0:07:52-0:07:53	11.1882
otpa-/-	Trial 36	0:07:53-0:07:54	11.1555
otpa-/-	Trial 36	0:07:54-0:07:55	14.628
otpa-/-	Trial 36	0:07:55-0:07:56	10.6943
otpa-/-	Trial 36	0:07:56-0:07:57	8.29279
otpa-/-	Trial 36	0:07:57-0:07:58	9.91789
otpa-/-	Trial 36	0:07:58-0:07:59	9.67322
otpa-/-	Trial 36	0:07:59-0:08:00	10.0785
otpa-/-	Trial 36	0:08:00-0:08:01	12.915
otpa-/-	Trial 36	0:08:01-0:08:02	14.819
otpa-/-	Trial 36	0:08:02-0:08:03	13.3119
otpa-/-	Trial 36	0:08:03-0:08:04	12.6212
otpa-/-	Trial 36	0:08:04-0:08:05	15.6688
otpa-/-	Trial 36	0:08:05-0:08:06	8.05551
otpa-/-	Trial 36	0:08:06-0:08:07	9.43591
otpa-/-	Trial 36	0:08:07-0:08:08	13.9399
otpa-/-	Trial 36	0:08:08-0:08:09	15.7929
otpa-/-	Trial 36	0:08:09-0:08:10	13.0087
otpa-/-	Trial 36	0:08:10-0:08:11	16.512
otpa-/-	Trial 36	0:08:11-0:08:12	11.1623
otpa-/-	Trial 36	0:08:12-0:08:13	11.6536
otpa-/-	Trial 36	0:08:13-0:08:14	12.5
otpa-/-	Trial 36	0:08:14-0:08:15	6.66955
otpa-/-	Trial 36	0:08:15-0:08:16	7.15416
otpa-/-	Trial 36	0:08:16-0:08:17	16.1308
otpa-/-	Trial 36	0:08:17-0:08:18	13.7496
otpa-/-	Trial 36	0:08:18-0:08:19	11.4705
otpa-/-	Trial 36	0:08:19-0:08:20	7.9614
otpa-/-	Trial 36	0:08:20-0:08:21	7.89465
otpa-/-	Trial 36	0:08:21-0:08:22	11.6364
otpa-/-	Trial 36	0:08:22-0:08:23	10.8937
otpa-/-	Trial 36	0:08:23-0:08:24	14.7948
otpa-/-	Trial 36	0:08:24-0:08:25	5.77372
otpa-/-	Trial 36	0:08:25-0:08:26	7.37157
otpa-/-	Trial 36	0:08:26-0:08:27	17.3354
otpa-/-	Trial 36	0:08:27-0:08:28	9.99093
otpa-/-	Trial 36	0:08:28-0:08:29	12.3974
otpa-/-	Trial 36	0:08:29-0:08:30	10.1477
otpa-/-	Trial 36	0:08:30-0:08:31	9.98191
otpa-/-	Trial 36	0:08:31-0:08:32	14.525
otpa-/-	Trial 36	0:08:32-0:08:33	13.8771
otpa-/-	Trial 36	0:08:33-0:08:34	7.1947
otpa-/-	Trial 36	0:08:34-0:08:35	12.483
otpa-/-	Trial 36	0:08:35-0:08:36	12.2086
otpa-/-	Trial 36	0:08:36-0:08:37	7.94641
otpa-/-	Trial 36	0:08:37-0:08:38	11.2765
otpa-/-	Trial 36	0:08:38-0:08:39	9.41923
otpa-/-	Trial 36	0:08:39-0:08:40	9.57502
otpa-/-	Trial 36	0:08:40-0:08:41	11.1998
otpa-/-	Trial 36	0:08:41-0:08:42	9.27574
otpa-/-	Trial 36	0:08:42-0:08:43	4.8099
otpa-/-	Trial 36	0:08:43-0:08:44	16.0137
otpa-/-	Trial 36	0:08:44-0:08:45	5.76413
otpa-/-	Trial 36	0:08:45-0:08:46	13.0746
otpa-/-	Trial 36	0:08:46-0:08:47	13.9125
otpa-/-	Trial 36	0:08:47-0:08:48	10.9832
otpa-/-	Trial 36	0:08:48-0:08:49	9.09238
otpa-/-	Trial 36	0:08:49-0:08:50	8.95026
otpa-/-	Trial 36	0:08:50-0:08:51	8.82643
otpa-/-	Trial 36	0:08:51-0:08:52	13.1462
otpa-/-	Trial 36	0:08:52-0:08:53	15.9493
otpa-/-	Trial 36	0:08:53-0:08:54	10.0519
otpa-/-	Trial 36	0:08:54-0:08:55	12.6289
otpa-/-	Trial 36	0:08:55-0:08:56	10.1728
otpa-/-	Trial 36	0:08:56-0:08:57	15.2562
otpa-/-	Trial 36	0:08:57-0:08:58	6.33262
otpa-/-	Trial 36	0:08:58-0:08:59	14.616
otpa-/-	Trial 36	0:08:59-0:09:00	9.45454
otpa-/-	Trial 36	0:09:00-0:09:01	14.3265
otpa-/-	Trial 36	0:09:01-0:09:02	14.1784
otpa-/-	Trial 36	0:09:02-0:09:03	4.69509
otpa-/-	Trial 36	0:09:03-0:09:04	8.02142
otpa-/-	Trial 36	0:09:04-0:09:05	15.4863
otpa-/-	Trial 36	0:09:05-0:09:06	16.4436
otpa-/-	Trial 36	0:09:06-0:09:07	11.2975
otpa-/-	Trial 36	0:09:07-0:09:08	12.7456
otpa-/-	Trial 36	0:09:08-0:09:09	12.4938
otpa-/-	Trial 36	0:09:09-0:09:10	6.35558
otpa-/-	Trial 36	0:09:10-0:09:11	11.2966
otpa-/-	Trial 36	0:09:11-0:09:12	9.49682
otpa-/-	Trial 36	0:09:12-0:09:13	11.3203
otpa-/-	Trial 36	0:09:13-0:09:14	12.1871
otpa-/-	Trial 36	0:09:14-0:09:15	15.4924
otpa-/-	Trial 36	0:09:15-0:09:16	7.95215
otpa-/-	Trial 36	0:09:16-0:09:17	13.4159
otpa-/-	Trial 36	0:09:17-0:09:18	15.0328
otpa-/-	Trial 36	0:09:18-0:09:19	10.8787
otpa-/-	Trial 36	0:09:19-0:09:20	7.90518
otpa-/-	Trial 36	0:09:20-0:09:21	12.2126
otpa-/-	Trial 36	0:09:21-0:09:22	16.2242
otpa-/-	Trial 36	0:09:22-0:09:23	11.7394
otpa-/-	Trial 36	0:09:23-0:09:24	11.7777
otpa-/-	Trial 36	0:09:24-0:09:25	16.32
otpa-/-	Trial 36	0:09:25-0:09:26	8.22325
otpa-/-	Trial 36	0:09:26-0:09:27	9.52186
otpa-/-	Trial 36	0:09:27-0:09:28	12.1886
otpa-/-	Trial 36	0:09:28-0:09:29	9.70611
otpa-/-	Trial 36	0:09:29-0:09:30	14.9704
otpa-/-	Trial 36	0:09:30-0:09:31	12.4466
otpa-/-	Trial 36	0:09:31-0:09:32	11.1818
otpa-/-	Trial 36	0:09:32-0:09:33	11.8545
otpa-/-	Trial 36	0:09:33-0:09:34	15.9725
otpa-/-	Trial 36	0:09:34-0:09:35	12.6035
otpa-/-	Trial 36	0:09:35-0:09:36	9.33324
otpa-/-	Trial 36	0:09:36-0:09:37	9.95248
otpa-/-	Trial 36	0:09:37-0:09:38	10.8971
otpa-/-	Trial 36	0:09:38-0:09:39	17.9475
otpa-/-	Trial 36	0:09:39-0:09:40	12.9024
otpa-/-	Trial 36	0:09:40-0:09:41	13.7821
otpa-/-	Trial 36	0:09:41-0:09:42	13.3749
otpa-/-	Trial 36	0:09:42-0:09:43	8.8623
otpa-/-	Trial 36	0:09:43-0:09:44	13.6041
otpa-/-	Trial 36	0:09:44-0:09:45	15.6458
otpa-/-	Trial 36	0:09:45-0:09:46	10.1754
otpa-/-	Trial 36	0:09:46-0:09:47	12.4304
otpa-/-	Trial 36	0:09:47-0:09:48	10.2301
otpa-/-	Trial 36	0:09:48-0:09:49	14.2426
otpa-/-	Trial 36	0:09:49-0:09:50	16.0825
otpa-/-	Trial 36	0:09:50-0:09:51	17.1305
otpa-/-	Trial 36	0:09:51-0:09:52	8.96359
otpa-/-	Trial 36	0:09:52-0:09:53	9.82994
otpa-/-	Trial 36	0:09:53-0:09:54	15.6636
otpa-/-	Trial 36	0:09:54-0:09:55	12.2474
otpa-/-	Trial 36	0:09:55-0:09:56	12.2266
otpa-/-	Trial 36	0:09:56-0:09:57	17.1625
otpa-/-	Trial 36	0:09:57-0:09:58	11.0487
otpa-/-	Trial 36	0:09:58-0:09:59	14.4677
otpa-/-	Trial 36	0:09:59-0:10:00	9.51198
otpa-/-	Trial 36	0:10:00-0:10:01	3.89074
otpa-/-	Trial 37	Start-0:00:01	2.15578
otpa-/-	Trial 37	0:00:01-0:00:02	2.38382
otpa-/-	Trial 37	0:00:02-0:00:03	2.47757
otpa-/-	Trial 37	0:00:03-0:00:04	2.33364
otpa-/-	Trial 37	0:00:04-0:00:05	2.26172
otpa-/-	Trial 37	0:00:05-0:00:06	1.73032
otpa-/-	Trial 37	0:00:06-0:00:07	1.7306
otpa-/-	Trial 37	0:00:07-0:00:08	1.55981
otpa-/-	Trial 37	0:00:08-0:00:09	1.61122
otpa-/-	Trial 37	0:00:09-0:00:10	2.8407
otpa-/-	Trial 37	0:00:10-0:00:11	2.78585
otpa-/-	Trial 37	0:00:11-0:00:12	1.98349
otpa-/-	Trial 37	0:00:12-0:00:13	4.26427
otpa-/-	Trial 37	0:00:13-0:00:14	2.79524
otpa-/-	Trial 37	0:00:14-0:00:15	11.0844
otpa-/-	Trial 37	0:00:15-0:00:16	11.6268
otpa-/-	Trial 37	0:00:16-0:00:17	5.50926
otpa-/-	Trial 37	0:00:17-0:00:18	9.82974
otpa-/-	Trial 37	0:00:18-0:00:19	7.62728
otpa-/-	Trial 37	0:00:19-0:00:20	8.31604
otpa-/-	Trial 37	0:00:20-0:00:21	4.96418
otpa-/-	Trial 37	0:00:21-0:00:22	3.26388
otpa-/-	Trial 37	0:00:22-0:00:23	3.26263
otpa-/-	Trial 37	0:00:23-0:00:24	5.02822
otpa-/-	Trial 37	0:00:24-0:00:25	14.5901
otpa-/-	Trial 37	0:00:25-0:00:26	9.40966
otpa-/-	Trial 37	0:00:26-0:00:27	10.8774
otpa-/-	Trial 37	0:00:27-0:00:28	4.89531
otpa-/-	Trial 37	0:00:28-0:00:29	2.35286
otpa-/-	Trial 37	0:00:29-0:00:30	5.3755
otpa-/-	Trial 37	0:00:30-0:00:31	1.21938
otpa-/-	Trial 37	0:00:31-0:00:32	0.281769
otpa-/-	Trial 37	0:00:32-0:00:33	0.264265
otpa-/-	Trial 37	0:00:33-0:00:34	1.21183
otpa-/-	Trial 37	0:00:34-0:00:35	7.14408
otpa-/-	Trial 37	0:00:35-0:00:36	6.76014
otpa-/-	Trial 37	0:00:36-0:00:37	16.1378
otpa-/-	Trial 37	0:00:37-0:00:38	11.9375
otpa-/-	Trial 37	0:00:38-0:00:39	17.7153
otpa-/-	Trial 37	0:00:39-0:00:40	13.9824
otpa-/-	Trial 37	0:00:40-0:00:41	13.9583
otpa-/-	Trial 37	0:00:41-0:00:42	13.7025
otpa-/-	Trial 37	0:00:42-0:00:43	8.48082
otpa-/-	Trial 37	0:00:43-0:00:44	8.90099
otpa-/-	Trial 37	0:00:44-0:00:45	5.2562
otpa-/-	Trial 37	0:00:45-0:00:46	7.76488
otpa-/-	Trial 37	0:00:46-0:00:47	11.6623
otpa-/-	Trial 37	0:00:47-0:00:48	5.33182
otpa-/-	Trial 37	0:00:48-0:00:49	1.70233
otpa-/-	Trial 37	0:00:49-0:00:50	0.348479
otpa-/-	Trial 37	0:00:50-0:00:51	0.366012
otpa-/-	Trial 37	0:00:51-0:00:52	0.747577
otpa-/-	Trial 37	0:00:52-0:00:53	1.46164
otpa-/-	Trial 37	0:00:53-0:00:54	8.8135
otpa-/-	Trial 37	0:00:54-0:00:55	13.1608
otpa-/-	Trial 37	0:00:55-0:00:56	8.60816
otpa-/-	Trial 37	0:00:56-0:00:57	9.29745
otpa-/-	Trial 37	0:00:57-0:00:58	15.3661
otpa-/-	Trial 37	0:00:58-0:00:59	11.462
otpa-/-	Trial 37	0:00:59-0:01:00	4.5877
otpa-/-	Trial 37	0:01:00-0:01:01	2.50909
otpa-/-	Trial 37	0:01:01-0:01:02	7.96655
otpa-/-	Trial 37	0:01:02-0:01:03	7.91039
otpa-/-	Trial 37	0:01:03-0:01:04	5.34562
otpa-/-	Trial 37	0:01:04-0:01:05	1.28361
otpa-/-	Trial 37	0:01:05-0:01:06	0.342785
otpa-/-	Trial 37	0:01:06-0:01:07	0.969358
otpa-/-	Trial 37	0:01:07-0:01:08	4.83909
otpa-/-	Trial 37	0:01:08-0:01:09	4.22813
otpa-/-	Trial 37	0:01:09-0:01:10	3.85012
otpa-/-	Trial 37	0:01:10-0:01:11	6.58164
otpa-/-	Trial 37	0:01:11-0:01:12	15.2665
otpa-/-	Trial 37	0:01:12-0:01:13	7.53077
otpa-/-	Trial 37	0:01:13-0:01:14	13.9299
otpa-/-	Trial 37	0:01:14-0:01:15	7.07658
otpa-/-	Trial 37	0:01:15-0:01:16	5.31596
otpa-/-	Trial 37	0:01:16-0:01:17	1.74799
otpa-/-	Trial 37	0:01:17-0:01:18	3.9051
otpa-/-	Trial 37	0:01:18-0:01:19	1.65556
otpa-/-	Trial 37	0:01:19-0:01:20	1.69611
otpa-/-	Trial 37	0:01:20-0:01:21	6.75141
otpa-/-	Trial 37	0:01:21-0:01:22	9.29009
otpa-/-	Trial 37	0:01:22-0:01:23	5.58044
otpa-/-	Trial 37	0:01:23-0:01:24	5.93262
otpa-/-	Trial 37	0:01:24-0:01:25	9.67779
otpa-/-	Trial 37	0:01:25-0:01:26	5.58527
otpa-/-	Trial 37	0:01:26-0:01:27	12.235
otpa-/-	Trial 37	0:01:27-0:01:28	16.4024
otpa-/-	Trial 37	0:01:28-0:01:29	17.0731
otpa-/-	Trial 37	0:01:29-0:01:30	9.87699
otpa-/-	Trial 37	0:01:30-0:01:31	9.02738
otpa-/-	Trial 37	0:01:31-0:01:32	9.98551
otpa-/-	Trial 37	0:01:32-0:01:33	13.103
otpa-/-	Trial 37	0:01:33-0:01:34	13.5249
otpa-/-	Trial 37	0:01:34-0:01:35	12.4627
otpa-/-	Trial 37	0:01:35-0:01:36	14.3081
otpa-/-	Trial 37	0:01:36-0:01:37	15.4016
otpa-/-	Trial 37	0:01:37-0:01:38	18.6692
otpa-/-	Trial 37	0:01:38-0:01:39	11.5655
otpa-/-	Trial 37	0:01:39-0:01:40	11.3068
otpa-/-	Trial 37	0:01:40-0:01:41	12.264
otpa-/-	Trial 37	0:01:41-0:01:42	15.879
otpa-/-	Trial 37	0:01:42-0:01:43	8.16647
otpa-/-	Trial 37	0:01:43-0:01:44	6.51902
otpa-/-	Trial 37	0:01:44-0:01:45	7.86644
otpa-/-	Trial 37	0:01:45-0:01:46	13.8872
otpa-/-	Trial 37	0:01:46-0:01:47	15.9076
otpa-/-	Trial 37	0:01:47-0:01:48	8.57797
otpa-/-	Trial 37	0:01:48-0:01:49	13.802
otpa-/-	Trial 37	0:01:49-0:01:50	9.23846
otpa-/-	Trial 37	0:01:50-0:01:51	11.0866
otpa-/-	Trial 37	0:01:51-0:01:52	18.4457
otpa-/-	Trial 37	0:01:52-0:01:53	6.75051
otpa-/-	Trial 37	0:01:53-0:01:54	6.37647
otpa-/-	Trial 37	0:01:54-0:01:55	1.5898
otpa-/-	Trial 37	0:01:55-0:01:56	0.427042
otpa-/-	Trial 37	0:01:56-0:01:57	0.219189
otpa-/-	Trial 37	0:01:57-0:01:58	3.41516
otpa-/-	Trial 37	0:01:58-0:01:59	15.5321
otpa-/-	Trial 37	0:01:59-0:02:00	10.1542
otpa-/-	Trial 37	0:02:00-0:02:01	7.35282
otpa-/-	Trial 37	0:02:01-0:02:02	5.94123
otpa-/-	Trial 37	0:02:02-0:02:03	6.50836
otpa-/-	Trial 37	0:02:03-0:02:04	11.9304
otpa-/-	Trial 37	0:02:04-0:02:05	9.47002
otpa-/-	Trial 37	0:02:05-0:02:06	3.47352
otpa-/-	Trial 37	0:02:06-0:02:07	8.25019
otpa-/-	Trial 37	0:02:07-0:02:08	13.445
otpa-/-	Trial 37	0:02:08-0:02:09	12.3858
otpa-/-	Trial 37	0:02:09-0:02:10	7.50856
otpa-/-	Trial 37	0:02:10-0:02:11	7.98308
otpa-/-	Trial 37	0:02:11-0:02:12	6.86034
otpa-/-	Trial 37	0:02:12-0:02:13	9.57741
otpa-/-	Trial 37	0:02:13-0:02:14	9.86396
otpa-/-	Trial 37	0:02:14-0:02:15	8.57577
otpa-/-	Trial 37	0:02:15-0:02:16	10.5075
otpa-/-	Trial 37	0:02:16-0:02:17	10.4555
otpa-/-	Trial 37	0:02:17-0:02:18	13.635
otpa-/-	Trial 37	0:02:18-0:02:19	18.0488
otpa-/-	Trial 37	0:02:19-0:02:20	15.0765
otpa-/-	Trial 37	0:02:20-0:02:21	5.8284
otpa-/-	Trial 37	0:02:21-0:02:22	6.23617
otpa-/-	Trial 37	0:02:22-0:02:23	7.79221
otpa-/-	Trial 37	0:02:23-0:02:24	8.02165
otpa-/-	Trial 37	0:02:24-0:02:25	5.16015
otpa-/-	Trial 37	0:02:25-0:02:26	5.5261
otpa-/-	Trial 37	0:02:26-0:02:27	14.6262
otpa-/-	Trial 37	0:02:27-0:02:28	4.66025
otpa-/-	Trial 37	0:02:28-0:02:29	9.03693
otpa-/-	Trial 37	0:02:29-0:02:30	11.9603
otpa-/-	Trial 37	0:02:30-0:02:31	9.86296
otpa-/-	Trial 37	0:02:31-0:02:32	7.04925
otpa-/-	Trial 37	0:02:32-0:02:33	7.68277
otpa-/-	Trial 37	0:02:33-0:02:34	7.33031
otpa-/-	Trial 37	0:02:34-0:02:35	4.62349
otpa-/-	Trial 37	0:02:35-0:02:36	8.27555
otpa-/-	Trial 37	0:02:36-0:02:37	12.863
otpa-/-	Trial 37	0:02:37-0:02:38	10.7967
otpa-/-	Trial 37	0:02:38-0:02:39	3.20924
otpa-/-	Trial 37	0:02:39-0:02:40	4.71261
otpa-/-	Trial 37	0:02:40-0:02:41	8.45385
otpa-/-	Trial 37	0:02:41-0:02:42	5.5467
otpa-/-	Trial 37	0:02:42-0:02:43	7.56783
otpa-/-	Trial 37	0:02:43-0:02:44	1.37238
otpa-/-	Trial 37	0:02:44-0:02:45	4.97203
otpa-/-	Trial 37	0:02:45-0:02:46	9.69989
otpa-/-	Trial 37	0:02:46-0:02:47	4.42219
otpa-/-	Trial 37	0:02:47-0:02:48	6.62719
otpa-/-	Trial 37	0:02:48-0:02:49	11.2276
otpa-/-	Trial 37	0:02:49-0:02:50	0.482008
otpa-/-	Trial 37	0:02:50-0:02:51	3.24406
otpa-/-	Trial 37	0:02:51-0:02:52	0.701563
otpa-/-	Trial 37	0:02:52-0:02:53	4.5356
otpa-/-	Trial 37	0:02:53-0:02:54	4.39401
otpa-/-	Trial 37	0:02:54-0:02:55	8.9977
otpa-/-	Trial 37	0:02:55-0:02:56	4.7042
otpa-/-	Trial 37	0:02:56-0:02:57	4.52496
otpa-/-	Trial 37	0:02:57-0:02:58	3.15044
otpa-/-	Trial 37	0:02:58-0:02:59	1.88776
otpa-/-	Trial 37	0:02:59-0:03:00	1.59688
otpa-/-	Trial 37	0:03:00-0:03:01	1.86567
otpa-/-	Trial 37	0:03:01-0:03:02	1.79286
otpa-/-	Trial 37	0:03:02-0:03:03	2.04393
otpa-/-	Trial 37	0:03:03-0:03:04	1.50821
otpa-/-	Trial 37	0:03:04-0:03:05	2.57071
otpa-/-	Trial 37	0:03:05-0:03:06	2.25674
otpa-/-	Trial 37	0:03:06-0:03:07	1.19437
otpa-/-	Trial 37	0:03:07-0:03:08	9.80697
otpa-/-	Trial 37	0:03:08-0:03:09	10.7549
otpa-/-	Trial 37	0:03:09-0:03:10	7.94128
otpa-/-	Trial 37	0:03:10-0:03:11	5.87272
otpa-/-	Trial 37	0:03:11-0:03:12	5.4575
otpa-/-	Trial 37	0:03:12-0:03:13	2.91616
otpa-/-	Trial 37	0:03:13-0:03:14	2.77123
otpa-/-	Trial 37	0:03:14-0:03:15	11.4055
otpa-/-	Trial 37	0:03:15-0:03:16	3.92011
[truncated: 26,849 more rows]

## Sheet: Figure1-Supplement 1D
	In zone
	social / Center-point
	Frequency
wild type 1	4
wild type 2	1
wild type 3	9
wild type 4	39
wild type 5	27
wild type 6	0
wild type 7	16
wild type 8	6
wild type 9	74
wild type 10	22
otpa-/- 1	22
otpa-/- 2	0
otpa-/- 3	4
otpa-/- 4	22
otpa-/- 5	0
otpa-/- 6	111
otpa-/- 7	34
otpa-/- 8	16
otpa-/- 9	23
otpa-/- 10	12

## Sheet: Figure1-Supplement 1E
		Swimming speed (cm/sec)
fish no.	genotype	Start-0:03:00	0:03:00-0:06:00	0:06:00-0:09:00
wt_1	wild type	2.97413	2.80353	2.83243
wt_2	wild type	5.0447	4.78263	4.30877
wt_3	wild type	2.60099	3.51403	3.35654
wt_4	wild type	3.10606	4.46163	4.40772
wt_5	wild type	3.31479	4.17972	3.74943
wt_6	wild type	1.0663	2.86344	2.29137
wt_7	wild type	0.515223	1.69125	1.6184
wt_8	wild type	1.81926	2.28351	2.17392
wt_9	wild type	3.09334	4.14034	4.05289
wt_10	wild type	4.08639	4.81195	5.23737
otpa_1	otpa-/-	2.46639	2.9463	2.83455
otpa_2	otpa-/-	0.99061	2.72	1.1466
otpa_3	otpa-/-	3.43879	3.9027	5.17523
otpa_4	otpa-/-	3.53216	3.21118	2.59881
otpa_5	otpa-/-	0.0804264	0.0745921	1.17171
otpa_6	otpa-/-	4.59036	6.2111	6.0829
otpa_7	otpa-/-	4.22035	4.0976	4.1353
otpa_8	otpa-/-	2.35261	2.67647	2.60341
otpa_9	otpa-/-	1.30197	1.27607	0.0374031
otpa_10	otpa-/-	2.70531	2.35107	2.23767

## Sheet: Figure1-Supplement 1F
		Distance moved (cm)
fish no.	genotype	Start-0:03:00	0:03:00-0:06:00	0:06:00-0:09:00
wt_1	wild type	535.225	504.635	509.838
wt_2	wild type	907.844	860.874	775.579
wt_3	wild type	468.075	632.526	604.177
wt_4	wild type	558.966	803.093	793.389
wt_5	wild type	596.53	752.349	674.897
wt_6	wild type	191.892	515.42	412.446
wt_7	wild type	92.7196	304.426	291.312
wt_8	wild type	327.393	411.031	391.305
wt_9	wild type	556.677	745.261	729.52
wt_10	wild type	735.387	866.152	942.726
otpa_1	otpa-/-	443.852	530.334	510.219
otpa_2	otpa-/-	178.27	489.6	206.387
otpa_3	otpa-/-	618.844	702.486	931.541
otpa_4	otpa-/-	634.942	578.012	467.786
otpa_5	otpa-/-	14.4735	13.4266	210.908
otpa_6	otpa-/-	826.081	1118	1094.92
otpa_7	otpa-/-	759.495	737.568	744.354
otpa_8	otpa-/-	423.376	481.765	468.614
otpa_9	otpa-/-	234.302	229.692	6.73256
otpa_10	otpa-/-	486.848	423.192	402.781
