# Supplementary material for: Homeodomain protein Otp affects developmental neuropeptide switching in oxytocin neurons associated with a long-term effect on social behavior
Source: eLife. 2017 Jan 17;6:e22170. doi: 10.7554/eLife.22170 (PMC5293488; doi:10.7554/eLife.22170)
Supplement: Figure 1—source data 1. — DOI: http://dx.doi.org/10.7554/eLife.22170.004 [file elife-22170-fig1-data1.xlsx]

## Sheet: Fig 1A
		Swimming speed (cm/sec)
fish no.	genotype	Start-0:01:00	0:01:00-0:02:00	0:02:00-0:03:00	0:03:00-0:04:00	0:04:00-0:05:00	0:05:00-0:06:00	0:06:00-0:07:00	0:07:00-0:08:00	0:08:00-0:09:00	0:09:00-0:10:00
wt_1	wt	6.48	6.15	7.16	8.37	9.61	7.85	6.79	6.76	7.24	8.11
wt_2	wt	5.78	6.24	6.87	7.14	7.78	7.3	6.51	7.35	8.32	7.82
wt_3	wt	4.45	8.32	10.43	12.04	12.94	14.05	15.38	16.05	17.21	16.26
wt_4	wt	7.17	8.22	9.46	10.29	11.36	10.27	10.73	10.69	11.29	11.31
wt_5	wt	11.37	11.46	15.21	17.49	17.98	16.57	17.4	17.3	17.07	15.87
wt_6	wt	7.94	10.21	11.49	11.63	10.37	10.32	10.02	10.25	10.81	11.29
wt_7	wt	2.25	2.5	0.5	1.52	0.87	1.46	0.67	1.1	0.97	0.77
wt_8	wt	4.44	8.46	9.94	9.36	11.12	9.54	8.41	7.57	7.7	7.46
wt_9	wt	12.66	12.6	13.87	12.27	13.46	13.38	14.52	16.02	13.75	14.32
wt_10	wt	6.13	7.21	7.52	7.73	8.71	8.71	9.86	9.59	8.94	9.42
wt_11	wt	6.36	9.63	11.43	13.39	13.41	14.16	13.97	15.43	15.42	16.23
wt_12	wt	5.7	8	7.91	7.74	7.73	7.75	8.49	7.23	8.35	12.1
otpa_1	otpA-/-	7.9	8.29	9.34	9.1	9.25	7.84	9.97	8.05	7.36	6.62
otpa_2	otpA-/-	8.75	10.41	9.5	10.51	10.98	11.33	9.89	9.58	10.28	8.97
otpa_3	otpA-/-	8.59	7.3	9.14	9.67	9.96	10.08	10.2	11.06	11.35	12.26
otpa_4	otpA-/-	6.31	8.63	7.5	4.38	6.49	7.6	6.47	7.75	4.8	5.9
otpa_5	otpA-/-	1.97	6.69	2.87	2.6	1.36	3.21	5.44	3.19	3.7	2.26
otpa_6	otpA-/-	8.85	9.51	7.61	6.81	6.36	6.04	6.71	6.78	5.54	5.46
otpa_7	otpA-/-	11.79	7.89	8.37	6.94	8.21	8.15	7.5	7.56	6.99	7.99
otpa_8	otpA-/-	0.37	0.1	1.28	0.1	0.07	0.7	0.06	0.49	0.4	0.44
otpa_9	otpA-/-	2.72	5.39	5.41	5.42	6.03	5.62	5.73	6.74	6.26	7.02
otpa_10	otpA-/-	3	4.53	6.19	5.12	4.75	4.69	4.68	4.42	4.21	5.43
otpa_11	otpA-/-	0.57	3.91	6.22	6.55	7.71	8.18	7.19	7.05	7.62	7.51
otpa_12	otpA-/-	5.69	7.2	4.74	3.26	2.98	1.88	4.28	4.35	4.64	3.82
otpa_13	otpA-/-	2.26	2.89	4.89	4.83	5.6	5.78	5.32	5.25	4.25	5.13
otpa_14	otpA-/-	0.4	0.13	0.1	0.11	0.09	0.08	0.08	0.08	0.08	0.06
otpa_15	otpA-/-	0.31	0.11	0.11	0.07	0.07	0.06	0.06	0.05	0.05	0.06
otpa_16	otpA-/-	0.4	0.07	0.03	5.21	5.21	4.9	5.38	5.33	5.59	4.87
otpa_17	otpA-/-	0.33	0.11	0.07	0.07	0.08	0.07	0.76	0.07	0.06	0.05
otpa_18	otpA-/-	3.05	5.2	6.12	4.46	4.17	4.57	3.85	3.58	2.41	3.87
otpa_19	otpA-/-	8.78	8.77	6.09	5.87	7.61	9.41	6.22	5.34	3.91	3.99
otpa_20	otpA-/-	1.27	0.08	6.86	0.09	0.06	2.47	1.26	1.8	1.71	2.93
otpa_21	otpA-/-	2.08	13.3	4.37	5.04	3.89	3.82	5.71	4.06	2.87	5.25
otpa_22	otpA-/-	0.33	0.1	0.06	0.06	0.06	0.06	0.05	0.05	0.04	0.05
otpa_23	otpA-/-	10.2	1.85	0.07	0.06	0.05	0.05	0.05	0.05	6.87	7.24
otpb_1	otpB-/-	2.95	6.8	7.58	9.21	11.34	10.71	10.91	13	12.75	12.83
otpb_2	otpB-/-	7.88	7.24	8.97	9.7	10.67	11.2	8.89	10.49	10.52	9.07
otpb_3	otpB-/-	0.27	5.82	8.29	9.07	11.69	12.06	13.38	14.07	13.97	14.41
otpb_4	otpB-/-	1.21	4.68	0.13	0.12	2.88	1.16	0.69	7.59	4.96	6.07
otpb_5	otpB-/-	5.52	6.04	7.39	7.64	6.43	6.37	5.21	4.62	4.59	5.97
otpb_6	otpB-/-	3.29	5.55	8.06	3.46	0.13	6.84	11.47	5.41	0.15	7.27
otpb_7	otpB-/-	0.67	4.28	6	7.85	9.46	9.88	8.74	10.36	9.81	9.81
otpb_8	otpB-/-	2.65	5.23	8.58	8.92	8.82	8.88	8.16	8.78	7.61	8.18
otpb_9	otpB-/-	3.51	6.44	6.22	8.14	8.76	9.49	10.94	11.89	12.16	10.8
otpb_10	otpB-/-	0.75	1.02	1	1.71	1.38	1.54	1.53	0.96	1.85	1.53
otpb_11	otpB-/-	5.01	10.03	14.34	13.72	14.26	16.11	15.27	15.73	14.82	15.54
otpb_12	otpB-/-	5.9	8.46	10.41	13.95	13.27	13.68	15.32	13.28	13.57	12.24
otpb_13	otpB-/-	1.83	6.55	6.64	12.01	13.16	11.63	7.46	11.36	8.69	9.1

## Sheet: Fig 1B
		Distance from walls (cm)
fish no.	genotype	Start-0:01:00	0:01:00-0:02:00	0:02:00-0:03:00	0:03:00-0:04:00	0:04:00-0:05:00	0:05:00-0:06:00	0:06:00-0:07:00	0:07:00-0:08:00	0:08:00-0:09:00	0:09:00-0:10:00
wt_1	wt	5.48	5.04	3.45	2.55	2.49	2.77	2.22	2.05	1.38	2.02
wt_2	wt	5.19	5.29	5.13	3.48	2.76	3.86	3.01	2.44	1.35	1.05
wt_3	wt	6.81	3.52	2.73	2.81	3.22	1.77	1.76	1.43	1.19	1.12
wt_4	wt	3.64	3.09	3.38	1.84	1.35	1.75	1.1	1.75	1.9	1.28
wt_5	wt	3.36	2.57	1.74	1.57	1.25	1.69	1.52	2.55	1.55	1.58
wt_6	wt	4.1	2.86	1.61	1.35	0.95	1.18	0.94	1.08	1.03	0.73
wt_7	wt	4.45	3.03	3.73	2.42	2.44	2.6	2.36	2.08	2.67	2.5
wt_8	wt	3.06	3.56	3.48	2.33	0.72	1.01	1.28	1.06	2.04	0.59
wt_9	wt	2.82	1.73	1.13	1.56	0.9	1.04	0.66	0.81	1.55	1.02
wt_10	wt	2.75	2.01	2.49	3.21	2.64	1.4	2.16	1.53	2.05	1.67
wt_11	wt	3.87	3.05	2.24	1.38	1.51	1.41	1.49	1.03	0.81	0.88
wt_12	wt	3.66	2.79	1.81	1.1	1.09	0.79	0.78	0.6	1.24	1.17
otpa_1	otpA-/-	3.51	5.05	3.56	3.58	3.05	4.33	3.06	3.6	3.83	4.59
otpa_2	otpA-/-	6.02	5.42	5.31	4.1	3.34	2.94	3.7	4.11	3.15	4.87
otpa_3	otpA-/-	4.81	5.85	3.44	2.49	2.01	1.89	2.49	1.66	1.9	1.31
otpa_4	otpA-/-	5.68	5.03	3.32	5.07	5.45	4.25	5.06	3.37	3.81	4.54
otpa_5	otpA-/-	7.4	4.33	4.26	5.79	3.31	2.9	3.6	5.44	2.83	2.48
otpa_6	otpA-/-	3.55	5.36	4.02	4.5	6.53	6.1	6.09	4.33	2.23	2.98
otpa_7	otpA-/-	5.22	5.47	5.21	6.04	4.32	3.92	5.74	4.28	4.34	2.71
otpa_8	otpA-/-	4.73	4.37	4.38	5.76	5.81	4.44	4.79	5.39	5.2	7.5
otpa_9	otpA-/-	6.02	5.74	5.14	5.24	4.38	3.86	4.67	2.65	2.65	2.45
otpa_10	otpA-/-	5.86	6.28	5.76	6.57	6.45	6.4	5.54	6.72	5.98	4.6
otpa_11	otpA-/-	7.9	6.46	4.7	4.12	3.44	2.01	3.16	2.15	2.55	2.25
otpa_12	otpA-/-	4.82	4.84	4.15	3.63	3.21	3.1	3.73	3.5	3.39	3.29
otpa_13	otpA-/-	6.36	7.05	5.36	5.46	5.27	4.53	4.96	5.34	4.65	4.34
otpa_14	otpA-/-	9.68	9.11	9.03	9.17	9.22	9.25	9.23	9.19	9.13	9.12
otpa_15	otpA-/-	5.81	9.46	8.64	8.18	7.92	7.48	7.48	7.48	7.48	7.48
otpa_16	otpA-/-	3.65	3.09	3.1	6.19	6.18	6.6	5.28	5.85	5.8	5.55
otpa_17	otpA-/-	8.57	6.84	7.16	7.25	7.2	7.01	7.45	8.32	8.24	8.23
otpa_18	otpA-/-	3.29	6.11	6.07	4.14	3.62	3.49	3.47	3.09	3.2	3.21
otpa_19	otpA-/-	3.56	3.36	3.26	3.01	2.86	3.09	2.87	3.06	2.9	2.56
otpa_20	otpA-/-	3.36	2.75	3.58	6.13	6.14	4.82	4.68	3.01	2.46	2.83
otpa_21	otpA-/-	3.81	3.24	2.78	3.31	6.1	5.45	2.64	2.51	3.32	2.93
otpa_22	otpA-/-	3.27	3.15	3.14	3.13	3.12	3.11	3.09	3.06	3.05	3.05
otpa_23	otpA-/-	5.06	2.22	1.93	1.91	1.89	1.86	1.84	1.82	4.12	4.8
otpb_1	otpB-/-	3.83	1.87	4.02	2.24	1.38	1.05	1.01	1.19	0.95	0.9
otpb_2	otpB-/-	3.45	4.56	2.03	1.02	1.1	1.01	0.94	0.77	1.38	0.88
otpb_3	otpB-/-	2.41	2.7	4.01	3.55	1.88	2.22	1.78	1.91	1.34	1.5
otpb_4	otpB-/-	5.45	3.76	1.14	1.06	2.63	3.27	3.66	2.09	1.55	1.58
otpb_5	otpB-/-	3.95	3.62	1.66	1.08	2	1.18	1.27	1.23	1.41	1.6
otpb_6	otpB-/-	5.88	6.87	2.31	2.76	3.83	2.9	1.67	1.71	2.53	1.52
otpb_7	otpB-/-	2.28	3.12	2.08	1.73	1.68	1.52	1.84	1.59	1.05	0.95
otpb_8	otpB-/-	2.26	3.28	2.18	1.32	1.25	1	2.01	0.96	2.08	0.91
otpb_9	otpB-/-	4.95	4.34	2.59	1.91	1.42	1.45	1.09	1.42	1.55	1.36
otpb_10	otpB-/-	2.58	4.08	2.5	2.31	2.27	2.95	2.11	1.57	2.07	1.58
otpb_11	otpB-/-	3.09	2.67	1.21	1.42	1.41	1.19	0.98	0.85	1.22	1.02
otpb_12	otpB-/-	3.79	3.1	1.93	1.15	1.33	1.1	0.99	1.26	1.15	1.36
otpb_13	otpB-/-	5.15	4.51	3.08	1.74	1.61	1.78	1.32	1.49	1.47	1.44

## Sheet: Fig 1C
fish no.	genotype	Time spent moving in home tank (%)
wt1	wt	96
wt2	wt	99
wt3	wt	100
wt4	wt	100
wt5	wt	100
wt6	wt	100
wt7	wt	100
wt8	wt	100
wt9	wt	100
wt10	wt	100
wt11	wt	100
wt12	wt	100
otpa19	otpa -/-	98
otpa20	otpa -/-	94
otpa1	otpa -/-	100
otpa2	otpa -/-	100
otpa3	otpa -/-	100
otpa4	otpa -/-	100
otpa5	otpa -/-	99
otpa6	otpa -/-	99
otpa7	otpa -/-	100
otpa8	otpa -/-	100
otpa9	otpa -/-	97
otpa10	otpa -/-	98
otpa11	otpa -/-	98
otpa12	otpa -/-	96
otpa13	otpa -/-	100
otpa14	otpa -/-	100
otpa15	otpa -/-	100
otpa16	otpa -/-	100
otpa17	otpa -/-	100
otpa18	otpa -/-	100
otpb1	otpb-/-	100
otpb2	otpb-/-	100
otpb3	otpb-/-	100
otpb4	otpb-/-	100

## Sheet: Fig 1D
fish no.	genotype	Mean swimming speed in home-tank (cm/sec)
wt1	wt	4.87
wt2	wt	4.08
wt3	wt	4.26
wt4	wt	3.62
wt5	wt	4
wt6	wt	3.64
wt7	wt	3.89
wt8	wt	3.25
wt9	wt	3.25
wt10	wt	3.56
wt11	wt	3.31
wt12	wt	3.27
otpa19	otpa -/-	4.92
otpa20	otpa -/-	3.77
otpa1	otpa -/-	4.23
otpa2	otpa -/-	4.43
otpa3	otpa -/-	4.07
otpa4	otpa -/-	3.85
otpa5	otpa -/-	4.6
otpa6	otpa -/-	3.48
otpa7	otpa -/-	4.37
otpa8	otpa -/-	3.89
otpa9	otpa -/-	4.18
otpa10	otpa -/-	3.63
otpa11	otpa -/-	5.27
otpa12	otpa -/-	5.4
otpa13	otpa -/-	3.66
otpa14	otpa -/-	3.44
otpa15	otpa -/-	3.15
otpa16	otpa -/-	4.72
otpa17	otpa -/-	4.02
otpa18	otpa -/-	4.8
otpb1	otpb-/-	6.25
otpb2	otpb-/-	2.9
otpb3	otpb-/-	2.38
otpb4	otpb-/-	4.4

## Sheet: Fig 1F
		Time in social zone (seconds)
fish no.	genotype	Start-0:03:00	0:03:00-0:06:00	0:06:00-0:09:00
wt1	wt	118.12	180	180
wt2	wt	0	114.88	180
wt3	wt	16.52	135.56	43.48
wt4	wt	61.4	69.72	72.68
wt5	wt	1.04	103.24	110.96
wt6	wt	0	0	0
wt7	wt	0	124.08	62.44
wt8	wt	50.56	0	51.04
wt9	wt	56.24	114.28	78.16
wt10	wt	27.32	119.32	154.84
otpa1	otpa-/-	34.92	49.16	33.08
otpa2	otpa-/-	0	0	0
otpa3	otpa-/-	4.28	0.68	0
otpa4	otpa-/-	0	23.72	34.92
otpa5	otpa-/-	0	0	0
otpa6	otpa-/-	46.16	25.16	44.8
otpa7	otpa-/-	53.92	22.76	12.36
otpa8	otpa-/-	107.76	7.96	54.8
otpa9	otpa-/-	175.32	117.04	0
otpa10	otpa-/-	2.56	14.32	66.36
otpb1	otpb-/-	100.52	180	180
otpb2	otpb-/-	169.68	174.84	180
otpb3	otpb-/-	0	0.68	0.44
otpb4	otpb-/-	75	180	144.48
otpb5	otpb-/-	32.2	65.96	13.6
otpb6	otpb-/-	21.08	22.68	41.32
otpb7	otpb-/-	139.96	176	103.72
otpb8	otpb-/-	174.08	179.56	178.44
otpb9	otpb-/-	29.28	1.92	5.32
otpb10	otpb-/-	147.16	93.6	38.76

## Sheet: Fig 1G
		Time in non-social zone (seconds)
fish no.	genotype	Start-0:03:00	0:03:00-0:06:00	0:06:00-0:09:00
wt1	wt	51.6	0	0
wt2	wt	0	0	0
wt3	wt	68.2	30.52	117.68
wt4	wt	0.6	39.84	8.84
wt5	wt	3.04	1.04	0
wt6	wt	0.44	0	0
wt7	wt	130.2	0	28.8
wt8	wt	0	0	86.24
wt9	wt	2.76	7.32	18
wt10	wt	46.2	27.44	5.28
otpa1	otpa-/-	9.72	0	2.8
otpa2	otpa-/-	53.08	4.2	19.44
otpa3	otpa-/-	0	0	0
otpa4	otpa-/-	0	1	5.28
otpa5	otpa-/-	148.52	0	0
otpa6	otpa-/-	6.12	17	36.12
otpa7	otpa-/-	2.24	5.28	4.44
otpa8	otpa-/-	0	0	0
otpa9	otpa-/-	0	55.96	180
otpa10	otpa-/-	18	16.2	5.92
otpb1	otpb-/-	0	0	0
otpb2	otpb-/-	0	0	0
otpb3	otpb-/-	0	0.52	0
otpb4	otpb-/-	0	0	14.24
otpb5	otpb-/-	7.56	0	5.56
otpb6	otpb-/-	3.72	5.44	6.16
otpb7	otpb-/-	9.84	0	12.08
otpb8	otpb-/-	0	0	0
otpb9	otpb-/-	7.44	7.44	0.68
otpb10	otpb-/-	5.44	4.32	6.84
