# Supplementary material for: Homeodomain protein Otp affects developmental neuropeptide switching in oxytocin neurons associated with a long-term effect on social behavior
Source: eLife. 2017 Jan 17;6:e22170. doi: 10.7554/eLife.22170 (PMC5293488; doi:10.7554/eLife.22170)
Supplement: Figure 3—source data 1. — DOI: http://dx.doi.org/10.7554/eLife.22170.012 [file elife-22170-fig3-data1.xlsx]

## Sheet: Figure 3C 
					Larvae
	Anerior-->Posterior	length (um)			Anerior-->Posterior	length (um)			Anerior-->Posterior	length (um)
NPO larva 1	116	5.439		NPO larva 2	92	3.516		NPO larva 3	84	7.268
NPO larva 1	110	5.886		NPO larva 2	104	5.053		NPO larva 3	78	4.648
NPO larva 1	110	5.631		NPO larva 2	122	8.186		NPO larva 3	95	5.746
NPO larva 1	110	6.042		NPO larva 2	149	7.461		NPO larva 3	107	4.563
NPO larva 1	102	5.027		NPO larva 2	107	6.569		NPO larva 3	98	6.958
NPO larva 1	118	7.432		NPO larva 2	119	9.042		NPO larva 3	124	7.204
NPO larva 1	110	5.427		NPO larva 2	136	6.813		NPO larva 3	91	5.215
NPO larva 1	118	5.534		NPO larva 2	112	6.719		NPO larva 3	103	5.616
NPO larva 1	87	5.027		NPO larva 2	141	6.554		NPO larva 3	119	5.631
NPO larva 1	98	6.01		NPO larva 2	169	4.703		NPO larva 3	78	5.366
NPO larva 1	117	5.499		NPO larva 2	173	7.235		NPO larva 3	90	5.339
NPO larva 1	119	6.922		NPO larva 2	180	4.609		NPO larva 3	79	5.499
NPO larva 1	124	5.584		NPO larva 2	189	5.915		NPO larva 3	113	6.034
NPO larva 1	126	5.717		NPO larva 2	189	6.783		NPO larva 3	125	6.147
NPO larva 1	150	7.2		NPO larva 2	102	6.081		NPO larva 3	109	6.806
NPO larva 1	136	5.519		NPO larva 2	121	5.654		NPO larva 3	140	5.677
NPO larva 1	161	5.499		NPO larva 2	143	6.064		NPO larva 3	173	6.844
NPO larva 1	188	7.883		NPO larva 2	179	5.466		NPO larva 3	134	5.531
NPO larva 1	95	5.342		NPO larva 2	191	6.862		NPO larva 3	123	7.297
NPO larva 1	129	5.023		NPO larva 2	162	5.932		NPO larva 3	144	5
NPO larva 1	165	8.279		NPO larva 2	175	6.251		NPO larva 3	161	6.268
NPO larva 1	142	5.32		NPO larva 2	133	9.051		NPO larva 3	172	6.297
NPO larva 1	161	7.152		NPO larva 2	147	7.193		NPO larva 3	144	5.581
NPO larva 1	184	5.424		NPO larva 2	160	5.654		NPO larva 3	165	6.571
NPO larva 1	133	5.354		NPO larva 2	169	4.525		NPO larva 3	156	5.977
NPO larva 1	137	6.118		NPO larva 2	184	4.751		NPO larva 3	81	6.01
NPO larva 1	164	5.93		NPO larva 2	195	8.101		NPO larva 3	215	5.439
NPO larva 1	178	4.465		NPO larva 2	170	5.357		NPO larva 3	196	4.52
NPO larva 1	188	5.091		NPO larva 2	180	5.499		NPO larva 3	118	5.754
NPO larva 1	201	5.903		NPO larva 2	201	5.002		NPO larva 3	108	4.574
NPO larva 1	211	6.01		NPO larva 2	225	5.932		NPO larva 3	190	4.701
NPO larva 1	120	6.689		NPO larva 2	219	5.053		NPO larva 3	142	5.797
NPO larva 1	147	6.307		NPO larva 2	232	7.288		NPO larva 3	163	4.373
NPO larva 1	155	8.334		NPO larva 2	206	6.332		NPO larva 3	116	4.534
NPO larva 1	149	5.043		NPO larva 2	217	6.832		NPO larva 3	113	3.835
NPO larva 1	172	5.499		NPO larva 2	171	6.168		NPO larva 3	122	4.918
NPO larva 1	192	7.942		NPO larva 2	202	5.499		NPO larva 3	148	5.631
NPO larva 1	108	5.674		NPO larva 2	196	4.388		NPO larva 3	163	5.903
NPO larva 1	172	4.347		NPO larva 2	206	4.486		NPO larva 3	132	6.369
NPO larva 1	90	4.868		NPO larva 2	160	3.36		NPO larva 3	185	4.773
NPO larva 1	125	4.885		NPO larva 2	132	5.372		NPO larva 3	172	4.935
NPO larva 1	102	4.403		NPO larva 2	112	7.093		NPO larva 3	181	4.043
NPO larva 1	157	5.12		NPO larva 2	175	4.167		NPO larva 3	141	6.438
NPO larva 1	155	6.519		NPO larva 2	164	5.099		NPO larva 3	117	6.315
NPO larva 1	78	5.354		NPO larva 2	122	5.582		NPO larva 3	103	4.267
NPO larva 1	165	6.01		NPO larva 2	148	6.085		NPO larva 3	78	6.872
PT larva 1	255	7.485		NPO larva 2	78	5.499		NPO larva 3	211	5.83
PT larva 1	265	9.869		NPO larva 2	220	5.832		NPO larva 3	197	4.354
PT larva 1	332	8.365		NPO larva 2	233	4.318		NPO larva 3	237	4.858
PT larva 1	294	6.519		NPO larva 2	146	4.005		NPO larva 3	176	5.255
PT larva 1	290	5.499		PT larva 2	386	8.164		PT larva 3	282	5.255
PT larva 1	381	5.788		PT larva 2	384	4.956		PT larva 3	286	7.2
PT larva 1	398	5.83		PT larva 2	330	8.41		PT larva 3	349	4.473
PT larva 1	316	5.717		PT larva 2	316	6.38		PT larva 3	319	7.698
PT larva 1	312	3.579		PT larva 2	323	5.334		PT larva 3	330	4.885
PT larva 1	332	5.271		PT larva 2	286	4.767		PT larva 3	296	5.867
PT larva 1	324	6.042		PT larva 2	309	4.167		PT larva 3	275	4.354
PT larva 1	315	5.605		PT larva 2	341	4.347		PT larva 3	273	7.448
PT larva 1	351	6.438		PT larva 2	347	5.372		PT larva 3	304	7.805
PT larva 1	389	3.844		PT larva 2	367	6.102		PT larva 3	361	4.534
PT larva 1	288	5.027		PT larva 2	356	4.878		PT larva 3	343	5.439
				PT larva 2	334	7.017		PT larva 3	284	6.221
				PT larva 2	325	7.246		PT larva 3	323	5.317
				PT larva 2	312	7.624		PT larva 3	303	5.036
				PT larva 2	295	6.085
				PT larva 2	304	4.659
				PT larva 2	377	6.03
				PT larva 2	377	4.074

## Sheet: Figure 3D
Adults
NPO adult 1	Posterior-->Anterior	length (um)			Posterior-->Anterior	length (um)
NPO adult 1	1279	7.4281		NPO adult 2	1274	5.37767
NPO adult 1	1290	8.94857		NPO adult 2	1285	5.52011
NPO adult 1	1289	5.4854		NPO adult 2	1292	5.33574
NPO adult 1	1281	7.6356		NPO adult 2	1307	5.4695
NPO adult 1	1276	7.16204		NPO adult 2	1271	6.00307
NPO adult 1	1243	4.28161		NPO adult 2	1279	4.6807
NPO adult 1	1280	5.25838		NPO adult 2	1289	4.05675
NPO adult 1	1254	4.96484		NPO adult 2	1262	5.00244
NPO adult 1	1249	4.77831		NPO adult 2	1265	4.38644
NPO adult 1	1283	5.14993		NPO adult 2	1259	4.02928
NPO adult 1	1321	3.69308		NPO adult 2	1245	2.66787
NPO adult 1	1259	3.95481		NPO adult 2	1310	4.01554
NPO adult 1	1271	3.64175		NPO adult 2	1280	5.49986
NPO adult 1	1257	4.25196		NPO adult 2	1319	5.37767
NPO adult 1	1248	3.81816		NPO adult 2	1297	5.66904
NPO adult 1	1271	4.25919		NPO adult 2	1309	4.33511
NPO adult 1	1266	3.78491		NPO adult 2	1272	3.01997
NPO adult 1	1275	4.42476		NPO adult 2	1272	3.35183
NPO adult 1	1286	3.95481		NPO adult 2	1270	3.35183
NPO adult 1	1282	3.90709		NPO adult 2	1305	6.13104
NPO adult 1	1254	2.6939		NPO adult 2	1315	6.01174
NPO adult 1	1259	4.6525		NPO adult 2	1324	4.02928
NPO adult 1	1320	5.86064		NPO adult 2	1269	6.01174
NPO adult 1	1293	4.47392		NPO adult 2	1275	4.12472
NPO adult 1	1283	5.70375		NPO adult 2	1305	4.77469
NPO adult 1	1317	4.19268		NPO adult 2	1293	6.14912
NPO adult 1	1283	4.03289		NPO adult 2	1270	4.01554
NPO adult 1	1321	4.6995		NPO adult 2	1281	4.63298
NPO adult 1	1258	3.36484		NPO adult 2	1335	5.70808
NPO adult 1	1274	4.95183		NPO adult 2	1300	3.54487
NPO adult 1	1284	4.19268		NPO adult 2	1307	5.37767
NPO adult 1	1298	5.3061		NPO adult 2	1305	4.6807
NPO adult 1	1308	5.03353		NPO adult 2	1287	4.47392
NPO adult 1	1302	3.04311		NPO adult 2	1289	4.01554
NPO adult 1	1277	4.52959		NPO adult 2	1266	5.27284
NPO adult 1	1274	4.93303		NPO adult 2	1281	4.2187
NPO adult 1	1286	5.81726		NPO adult 2	1327	6.93935
NPO adult 1	1288	5.7746		NPO adult 2	1339	4.48694
NPO adult 1	1299	4.50935		NPO adult 2	1293	4.01554
NPO adult 1	1262	2.76258		NPO adult 2	1314	8.11423
NPO adult 1	1256	3.91505		NPO adult 2	1267	5.52011
NPO adult 1	1276	5.59313		NPO adult 2	1340	4.85567
NPO adult 1	1272	4.50935		NPO adult 2	1327	5.83389
NPO adult 1	1307	6.52218		NPO adult 2	1281	4.05675
NPO adult 1	1315	5.14993		NPO adult 2	1292	5.37767
NPO adult 1	1327	4.93303		NPO adult 2	1314	5.37767
NPO adult 1	1355	6.52218		NPO adult 2	1335	4.64527
NPO adult 1	1337	8.3145		NPO adult 2	1320	6.23009
NPO adult 1	1331	5.14993		NPO adult 2	1308	4.27076
NPO adult 1	1321	4.27365		NPO adult 2	1300	5.52011
NPO adult 1	1309	5.00244		NPO adult 2	1367	13.6893
NPO adult 1	1327	3.18337		NPO adult 2	1354	10.2297
NPO adult 1	1320	4.50935		NPO adult 2	1344	8.60659
NPO adult 1	1327	4.25919		NPO adult 2	1330	4.92363
NPO adult 1	1350	4.42476		NPO adult 2	1325	7.49462
NPO adult 1	1339	6.37686		NPO adult 2	1298	4.44934
NPO adult 1	1328	4.36837		NPO adult 2	1305	4.6807
NPO adult 1	1313	6.72968		NPO adult 2	1335	6.13104
NPO adult 1	1353	7.72164		NPO adult 2	1342	8.06579
NPO adult 1	1313	6.64582		NPO adult 2	1316	5.00244
NPO adult 1	1332	5.50275		NPO adult 2	1263	7.19891
NPO adult 1	1320	4.92652		NPO adult 2	1269	6.34505
NPO adult 1	1298	4.75879		NPO adult 2	1282	8.75336
NPO adult 1	1315	4.12472		NPO adult 2	1290	6.74414
NPO adult 1	1289	5.6206		NPO adult 2	1275	7.337
NPO adult 1	1286	6.52218		NPO adult 2	1278	5.49986
NPO adult 1	1253	5.14993		NPO adult 2	1346	4.6807
NPO adult 1	1260	4.25196		NPO adult 2	1321	7.73538
NPO adult 1	1264	3.90709		NPO adult 2	1335	6.29227
NPO adult 1	1261	3.47474		NPO adult 2	1318	8.72806
NPO adult 1	1272	3.09372		NPO adult 2	1331	6.14912
NPO adult 1	1300	3.64175		NPO adult 2	1314	10.0266
NPO adult 1	1253	5.34658		NPO adult 2	1282	4.34812
NPO adult 1	1276	5.00894		NPO adult 2	1277	5.52011
NPO adult 1	1296	7.29218		NPO adult 2	1281	5.9098
NPO adult 1	1277	6.3277		NPO adult 2	1290	5.4695
NPO adult 1	1305	3.81816		NPO adult 2	1300	5.09064
NPO adult 1	1293	5.7746		NPO adult 2	1248	7.36737
NPO adult 1	1291	5.50275		NPO adult 2	1322	8.25015
NPO adult 1	1291	3.58102		NPO adult 2	1310	6.14912
NPO adult 1	1315	4.31776		NPO adult 2	1370	7.0666
NPO adult 1	1295	6.50338		NPO adult 2	1283	8.57406
NPO adult 1	1254	4.12472		NPO adult 2	1324	10.3432
NPO adult 1	1267	7.27049		NPO adult 2	1352	10.4719
NPO adult 1	1316	9.37514		NPO adult 2	1364	6.33637
NPO adult 1	1337	9.75472		NPO adult 2	1354	7.49462
NPO adult 1	1351	8.9558		NPO adult 2	1278	8.75336
NPO adult 1	1327	8.51839		NPO adult 2	1317	7.21482
NPO adult 1	1317	6.04934		NPO adult 2	1312	6.13104
NPO adult 1	1300	6.29805		NPO adult 2	1342	6.66967
NPO adult 1	1306	6.45494		NPO adult 2	1332	6.29227
NPO adult 1	1316	5.86064		NPO adult 2	1355	7.75707
NPO adult 1	1319	5.75291		NPO adult 2	1356	6.41446
NPO adult 1	1287	8.06579		NPO adult 2	1335	7.2835
NPO adult 1	1308	6.72968		NPO adult 2	1316	6.03994
NPO adult 1	1274	6.01319		NPO adult 2	1304	6.96321
NPO adult 1	1264	6.95381		NPO adult 2	1296	6.70293
NPO adult 1	1274	6.04428		NPO adult 2	1331	5.83389
NPO adult 1	1292	7.94505		NPO adult 2	1293	5.69869
NPO adult 1	1291	6.60316		NPO adult 2	1293	5.3878
NPO adult 1	1301	6.73474		NPO adult 2	1281	7.67754
NPO adult 1	1320	5.80135		NPO adult 2	1242	5.37767
NPO adult 1	1283	6.04934		NPO adult 2	1258	10.0099
NPO adult 1	1290	6.64582		NPO adult 2	1255	9.9492
NPO adult 1	1246	5.25838		NPO adult 2	1292	6.3277
NPO adult 1	1309	7.00298		NPO adult 2	1306	7.03479
NPO adult 1	1330	7.76574		NPO adult 2	1301	6.41446
NPO adult 1	1329	8.50393		NPO adult 2	1337	5.66904
NPO adult 1	1323	5.81726		NPO adult 2	1242	6.37108
NPO adult 1	1310	5.59313		NPO adult 2	1257	8.07302
NPO adult 1	1305	6.50338		NPO adult 2	1243	4.77469
NPO adult 1	1326	6.91766		NPO adult 2	1236	5.9004
NPO adult 1	1335	5.75797		NPO adult 2	1184	8.44319
NPO adult 1	1264	4.19268		NPO adult 2	1212	9.39105
NPO adult 1	1298	4.77831		NPO adult 2	1181	9.80822
NPO adult 1	1396	10.0078		NPO adult 2	1198	8.97966
NPO adult 1	1384	10.3758		NPO adult 2	1131	9.7229
NPO adult 1	1371	9.33827		NPO adult 2	1068	14.3559
NPO adult 1	1340	7.50763		NPO adult 2	1357	6.01174
NPO adult 1	1355	8.05422		NPO adult 2	1371	6.37108
NPO adult 1	1282	7.94866		NPO adult 2	1371	7.84961
NPO adult 1	1337	9.25802		NPO adult 2	1367	7.61174
NPO adult 1	1363	8.46344		NPO adult 2	1099	9.39683
NPO adult 1	1346	9.25802		NPO adult 2	1093	10.3866
NPO adult 1	1353	6.91766		NPO adult 2	1034	10.3382
NPO adult 1	1352	7.25747		NPO adult 2	1018	13.155
NPO adult 1	1348	6.52218		NPO adult 2	982	15.1584
NPO adult 1	1342	7.07456		NPO adult 2	1029	7.67754
NPO adult 1	1308	8.53718		NPO adult 2	933	11.748
NPO adult 1	1296	7.16204		NPO adult 2	896	9.69398
NPO adult 1	1312	7.77008		NPO adult 2	865	9.39105
NPO adult 1	1317	7.02105		NPO adult 2	839	9.27175
NPO adult 1	1334	6.5793		NPO adult 2	856	5.22006
NPO adult 1	1329	7.59439		NPO adult 2	821	8.36366
NPO adult 1	1311	8.17785		PT adult 2	653	2.68884
NPO adult 1	1260	8.66805		PT adult 2	629	3.80226
NPO adult 1	1283	8.03904		PT adult 2	635	4.47392
NPO adult 1	1231	4.24473		PT adult 2	643	3.3352
NPO adult 1	1268	3.33664		PT adult 2	572	6.87501
NPO adult 1	1266	5.10149		PT adult 2	654	5.67917
NPO adult 1	1230	4.74577		PT adult 2	602	3.80226
NPO adult 1	1249	7.06082		PT adult 2	500	5.0798
NPO adult 1	1221	8.86398		PT adult 2	599	3.59186
NPO adult 1	1191	10.7582		PT adult 2	566	5.70808
NPO adult 1	1201	11.0308		PT adult 2	572	4.5361
NPO adult 1	1229	9.40189		PT adult 2	545	4.66913
NPO adult 1	1227	5.52517		PT adult 2	528	3.72851
NPO adult 1	1245	4.98364		PT adult 2	511	2.68884
NPO adult 1	1134	8.28413
NPO adult 1	1059	11.2665
NPO adult 1	1062	5.53673
NPO adult 1	1002	7.2018
NPO adult 1	1027	6.17731
NPO adult 1	945	6.34505
NPO adult 1	897	6.80198
NPO adult 1	860	8.65792
NPO adult 1	848	10.4452
NPO adult 1	833	8.1417
NPO adult 1	863	8.65142
NPO adult 1	866	6.3277
NPO adult 1	764	7.49462
NPO adult 1	774	6.74414
NPO adult 1	904	5.82449
NPO adult 1	888	5.00244
NPO adult 1	873	5.22006
NPO adult 1	1069	13.5794
NPO adult 1	1080	12.873
NPO adult 1	958	6.56918
PT adult 1	581	5.25838
PT adult 1	560	3.16385
PT adult 1	537	5.52517
PT adult 1	499	5.71459
PT adult 1	575	5.50854
PT adult 1	546	4.52959
PT adult 1	614	4.81084
PT adult 1	550	3.95481
PT adult 1	504	4.81084
PT adult 1	506	3.91505
PT adult 1	510	4.25919
PT adult 1	469	5.27645
PT adult 1	499	4.75228
PT adult 1	491	3.48341
PT adult 1	528	4.07194
PT adult 1	532	6.50772
PT adult 1	640	2.70547
PT adult 1	623	4.36837
PT adult 1	548	3.97722
PT adult 1	576	3.48197
