# Supplementary material for: Homeodomain protein Otp affects developmental neuropeptide switching in oxytocin neurons associated with a long-term effect on social behavior
Source: eLife. 2017 Jan 17;6:e22170. doi: 10.7554/eLife.22170 (PMC5293488; doi:10.7554/eLife.22170)
Supplement: Figure 4—source data 1. — DOI: http://dx.doi.org/10.7554/eLife.22170.014 [file elife-22170-fig4-data1.xlsx]

## Sheet: Figure 4E+F
	Number of oxytocinergic cells
genotype	NPO	PT
otpa+/-;otpb-/-	26	3
otpa+/-;otpb-/-	24	1
otpa-/-;otp+/+	36	4
otpa-/-;otp+/+	30	4
otpa-/-;otp+/+	29	6
otpa-/-;otp+/+	32	5
otpa-/-;otp+/+	30	2
otpa-/-;otp+/+	29	3
otpa-/-;otp+/+	34	7
otpa-/-;otp+/+	32	8
otpa-/-;otp+/+	36	2
otpa-/-;otpb+/-	28	8
otpa-/-;otpb+/-	30	8
otpa-/-;otpb+/-	30	8
otpa-/-;otpb+/-	26	3
otpa-/-;otpb+/-	31	4
otpa-/-;otpb+/-	29	3
otpa-/-;otpb+/-	30	4
otpa-/-;otpb+/-	28	1
otpa-/-;otpb+/-	22	5
otpa-/-;otpb+/-	17	2
otpa-/-;otpb+/-	35	8
otpa-/-;otpb+/-	30	4
otpa-/-;otpb+/-	18	0
otpa-/-;otpb+/-	31	4
otpa-/-;otpb+/-	24	1
otpa-/-;otpb+/-	25	4
otpa-/-;otpb+/-	24	7
otpa-/-;otpb+/-	25	1
otpa-/-;otpb+/-	28	8
otpa-/-;otpb+/-	18	2
otpa-/-;otpb+/-	30	7
otpa-/-;otpb+/-	25	4
otpa-/-;otpb-/-	0	0
otpa-/-;otpb-/-	0	0
otpa-/-;otpb-/-	0	0
otpa-/-;otpb-/-	0	0
otpa-/-;otpb-/-	0	0
otpa+/+;otpb+/+	32	0
otpa+/+;otpb+/+	35	0
otpa+/+;otpb+/+	28	0
otpa+/+;otpb+/+	29	0
otpa+/+;otpb+/+	36	0
otpa+/+;otpb+/+	34	0
otpa+/+;otpb+/+	30	0
otpa+/+;otpb+/-	31	0
otpa+/+;otpb+/-	29	0
otpa+/+;otpb+/-	31	0
otpa+/+;otpb+/-	28	1
otpa+/+;otpb+/-	26	0
otpa+/+;otpb+/-	29	0
otpa+/+;otpb+/-	29	0
otpa+/+;otpb+/-	38	0
otpa+/+;otpb+/-	35	0
otpa+/+;otpb+/-	27	0
otpa+/+;otpb+/-	33	0
otpa+/+;otpb-/-	26	0
otpa+/+;otpb-/-	20	0
otpa+/+;otpb-/-	30	0
otpa+/+;otpb-/-	27	0
otpa+/+;otpb-/-	28	0
otpa+/-;otpb+/+	33	0
otpa+/-;otpb+/+	36	0
otpa+/-;otpb+/+	38	1
otpa+/-;otpb+/+	28	0
otpa+/-;otpb+/+	27	0
otpa+/-;otpb+/+	25	0
otpa+/-;otpb+/+	29	0
otpa+/-;otpb+/+	36	0
otpa+/-;otpb+/+	25	0
otpa+/-;otpb+/+	35	1
otpa+/-;otpb+/+	33	1
otpa+/-;otpb+/+	27	0
otpa+/-;otpb+/+	36	0
otpa+/-;otpb+/+	32	2
otpa+/-;otpb+/+	28	0
otpa+/-;otpb+/+	31	0
otpa+/-;otpb+/+	32	0
otpa+/-;otpb+/+	36	0
otpa+/-;otpb+/+	29	1
otpa+/-;otpb+/+	36	0
otpa+/-;otpb+/+	30	0
otpa+/-;otpb+/+	29	0
otpa+/-;otpb+/+	37	0
otpa+/-;otpb+/+	33	0
otpa+/-;otpb+/+	26	1
otpa+/-;otpb+/+	31	0
otpa+/-;otpb+/-	42	0
otpa+/-;otpb+/-	36	0
otpa+/-;otpb+/-	30	0
otpa+/-;otpb+/-	27	0
otpa+/-;otpb+/-	21	0
otpa+/-;otpb+/-	26	0
otpa+/-;otpb+/-	32	0
otpa+/-;otpb+/-	34	0
otpa+/-;otpb+/-	27	0
otpa+/-;otpb+/-	25	0
otpa+/-;otpb+/-	24	0
otpa+/-;otpb+/-	27	0
otpa+/-;otpb+/-	27	0
otpa+/-;otpb+/-	21	0
otpa+/-;otpb+/-	30	0
otpa+/-;otpb+/-	25	0
otpa+/-;otpb+/-	28	0
otpa+/-;otpb+/-	31	1
otpa+/-;otpb+/-	30	0
otpa+/-;otpb+/-	30	1
otpa+/-;otpb+/-	33	0
otpa+/-;otpb+/-	28	0
otpa+/-;otpb+/-	27	0
otpa+/-;otpb+/-	29	0
otpa+/-;otpb+/-	31	0
otpa+/-;otpb+/-	30	0
otpa+/-;otpb+/-	30	1
otpa+/-;otpb+/-	23	1
