# Supplementary material for: Homeodomain protein Otp affects developmental neuropeptide switching in oxytocin neurons associated with a long-term effect on social behavior
Source: eLife. 2017 Jan 17;6:e22170. doi: 10.7554/eLife.22170 (PMC5293488; doi:10.7554/eLife.22170)
Supplement: Figure 5—source data 1. — DOI: http://dx.doi.org/10.7554/eLife.22170.016 [file elife-22170-fig5-data1.xlsx]

## Sheet: Figure 5G
fish No./genotype	NPO
	# of oxt+/crh+ in the PT	% of oxt+/crh+ in the PT
otpa-/- 1	7	21.875
otpa-/- 2	8	25.8065
otpa-/- 3	6	20.6897
otpa-/- 4	6	22.2222
otpa-/- 5	8	25.8065
otpa-/- 6	8	24.2424
otpa-/- 7	6	21.4286
otpa-/- 8	6	16.2162
otpa-/- 9	11	25
otpa-/- 10	4	12.5
otpa-/- 11	9	29.0323
otpa-/- 12	4	12.1212
otpa-/- 13	7	20
otpa-/- 14	8	24.2424
otpa-/- 15	5	15.625
otpa-/- 16	7	20
otpa-/- 17	6	18.75
otpa-/- 18	2	6.89655
otpa-/- 19	5	19.2308
otpa-/- 20	6	19.3548
otpa-/- 21	2	8.69565
otpa-/- 22	3	9.375
otpa-/- 23	8	24.2424
otpa-/- 24	5	15.1515
otpa-/- 25	8	25
otpa-/- 26	4	12.5
otpa-/- 27	4	13.3333
otpa-/- 28	1	2.77778
otpa-/- 29	1	3.7037
otpa-/- 30	2	6.06061
wt 1	3	8.57143
wt 2	5	16.129
wt 3	0	0
wt 4	3	10.7143
wt 5	8	22.8571
wt 6	5	12.8205
wt 7	2	5.40541
wt 8	0	0
wt 9	0	0
wt 10	1	2.85714
wt 11	1	3.84615
wt 12	0	0
wt 13	0	0
wt 14	1	2.94118
wt 15	1	2.7027
wt 16	1	3.125
wt 17	2	5.55556
wt 18	0	0
wt 19	0	0
wt 20	0	0
wt 21	2	5.26316
wt 22	4	10.5263
wt 23	1	2.77778
wt 24	0	0
wt 25	3	10
wt 26	2	4.7619
wt 27	2	4.87805
wt 28	1	3.0303
wt 29	2	6.66667
wt 30	6	17.1429
wt 31	3	13.0435
wt 32	9	21.4286
wt 33	4	14.2857
wt 34	2	6.45161
wt 35	4	19.0476
wt 36	2	6.66667
wt 37	2	8.33333
wt 38	3	13.0435
wt 39	6	13.6364
wt 40	0	0
otpb-/- 1	5	13.5135
otpb-/- 2	0	0
otpb-/- 3	4	16
otpb-/- 4	3	11.5385
otpb-/- 5	3	9.375
otpb-/- 6	3	8.57143
otpb-/- 7	4	10
otpb-/- 8	3	11.1111
otpb-/- 9	4	9.7561
otpb-/- 10	7	21.2121
otpb-/- 11	1	3.0303
otpb-/- 12	2	5.55556
otpb-/- 13	2	7.40741
otpb-/- 14	4	10
otpb-/- 15	2	8
otpb-/- 16	1	2.43902
otpb-/- 17	2	5.40541
otpb-/- 18	2	5
otpb-/- 19	3	8.10811
otpb-/- 20	1	5.26316

## Sheet: Figure 5H
fish No./genotype	PT
	# of oxt+/crh+ in the PT	% of oxt+/crh+ in the PT
otpa-/- 1	0	0
otpa-/- 2	0	0
otpa-/- 3	0	0
otpa-/- 4	0	0
otpa-/- 5	0	0
otpa-/- 6	0	0
otpa-/- 7	0	0
otpa-/- 8	0	0
otpa-/- 9	0	0
otpa-/- 10	0	0
otpa-/- 11	0	0
otpa-/- 12	0	0
otpa-/- 13	0	0
otpa-/- 14	0	0
otpa-/- 15	0	0
otpa-/- 16	0	0
otpa-/- 17	0	0
otpa-/- 18	0	0
otpa-/- 19	0	0
otpa-/- 20	0	0
otpa-/- 21	1	8.33333
otpa-/- 22	0	0
otpa-/- 23	0	0
otpa-/- 24	0	0
otpa-/- 25	0	0
otpa-/- 26	0	0
otpa-/- 27	0	0
otpa-/- 28	0	0
otpa-/- 29	0	0
otpa-/- 30	0	0
wt 1	0	0
wt 2	1	11.1111
wt 3	0	0
wt 4	1	7.69231
wt 5	1	25
wt 6	0	0
wt 7	1	16.6667
wt 8	0	0
wt 9	2	18.1818
wt 10	4	30.7692
wt 11	2	15.3846
wt 12	1	14.2857
wt 13	1	14.2857
wt 14	2	25
wt 15	3	27.2727
wt 16	1	12.5
wt 17	1	10
wt 18	3	27.2727
wt 19	1	12.5
wt 20	0	0
wt 21	0	0
wt 22	0	0
wt 23	2	18.1818
wt 24	0	0
wt 25	0	0
wt 26	1	8.33333
wt 27	0	0
wt 28	1	10
wt 29	2	20
wt 30	1	11.1111
wt 31	1	14.2857
wt 32	2	22.2222
wt 33	1	16.6667
wt 34	0	0
wt 35	1	16.6667
wt 36	2	25
wt 37	0	0
wt 38	0	0
wt 39	0	0
wt 40	0	0
otpb-/- 1	2	13.3333
otpb-/- 2	0	0
otpb-/- 3	0	0
otpb-/- 4	0	0
otpb-/- 5	1	9.09091
otpb-/- 6	1	7.69231
otpb-/- 7	0	0
otpb-/- 8	1	12.5
otpb-/- 9	2	14.2857
otpb-/- 10	0	0
otpb-/- 11	0	0
otpb-/- 12	1	12.5
otpb-/- 13	2	20
otpb-/- 14	1	6.25
otpb-/- 15	0	0
otpb-/- 16	0	0
otpb-/- 17	0	0
otpb-/- 18	0	0
otpb-/- 19	0	0
otpb-/- 20	0	0
