# Supplementary material for: Homeodomain protein Otp affects developmental neuropeptide switching in oxytocin neurons associated with a long-term effect on social behavior
Source: eLife. 2017 Jan 17;6:e22170. doi: 10.7554/eLife.22170 (PMC5293488; doi:10.7554/eLife.22170)
Supplement: Figure 8—figure supplement 1—source data 1. — DOI: http://dx.doi.org/10.7554/eLife.22170.024 [file elife-22170-fig8-figsupp1-data1.xlsx]

## Sheet: Figure8-Supplement 1A
	Swimming speed (cm/sec)
	Start-0:01:00	0:01:00-0:02:00	0:02:00-0:03:00	0:03:00-0:04:00	0:04:00-0:05:00	0:05:00-0:06:00	0:06:00-0:07:00	0:07:00-0:08:00	0:08:00-0:09:00	0:09:00-0:10:00
control1	6.64	0.36	0.17	3	0.16	0.16	3.48	0.76	5.92	10.3
control2	4.73	8.36	8.85	7.59	10.67	10.22	9.75	10.92	9.44	7.84
control3	2.6	0.07	0.83	6.48	9.17	10.64	8.6	0.03	0.58	9.44
control4	2.85	0.17	1.6	1.58	2.56	4.92	5.88	5.57	6.2	7.18
control5	3.15	1.04	0.08	0.07	0.05	3.84	0.08	0.06	0.04	0.04
control6	4.16	5.34	6.86	7.06	9.29	7.2	10.98	12.24	10.98	6.96
control7	9.42	15.98	16.65	15.82	16.3	18.33	17.17	15.99	14.63	12.85
control8	0.13	0.05	2.6	2.31	10.03	9	9.61	9.19	9.52	11.13
control9	0.13	0.05	0.04	1.88	0.05	0.71	2.39	5.53	6.17	4.85
control10	1.87	0.29	3.1	4.75	3.17	4.39	3.03	4.9	3.91	5.55
control11	0.19	0.07	0.05	1.18	0.28	6.07	10.23	9.29	7.91	10.46
control12	0.57	6.1	0.15	0.08	6.7	10.41	13.48	11.05	13.31	14.27
control13	3.12	0.09	1.05	1.96	6.13	3.84	1.32	6.61	6.52	3.74
control14	5.18	4.11	6.22	6.51	6.42	1.59	0.06	0.79	0.05	0.26
control15	3.48	11.01	12.74	13.09	11.94	11.54	10.79	11.85	11.5	9.77
control16	0.19	5.59	8.25	7.89	9.6	15.88	15.2	15.18	15.37	15.28
ablated 1	8.35	9.88	11	10.74	12.38	13.82	13.68	14.16	13.34	13.17
ablated 2	5.87	6.12	8.29	8.33	9.95	12.11	12	11.57	11.36	11.05
ablated 3	8.08	7.29	9.97	9.51	9.34	10.6	11.01	9.31	11.08	11.08
ablated 4	6.99	13.91	14.1	11.9	10.65	10.46	11.59	9.29	10.86	12.51
ablated 5	8.87	9.66	8.86	7.49	7.8	9.91	9.89	9.23	9.03	7.08
ablated 6	3.59	0.17	0.1	0.09	0.89	0.09	2.51	0.04	1.75	3.03
ablated 7	5.45	0.18	0.08	0.05	0.04	0.04	0.04	0.04	0.04	0.04
ablated 8	3.02	3.21	15.06	15.9	14.34	15.25	12.36	14.08	11.26	11.26
ablated 9	8.43	8.81	12.66	16.2	17.03	15.55	12.56	15.76	15.67	17.23
ablated 10	10.91	14.15	13.68	14.3	13.98	9.22	7.44	7.97	5.51	8
ablated 11	13.41	18.71	17.64	16.64	15.41	12.52	12.63	12.17	10.4	10.64
ablated 12	4.74	4.95	7.82	9.54	7.94	9.03	6.98	8.25	9.24	7.45
ablated 13	9.66	1.79	2.53	5.15	12.11	14.37	12.75	10.32	9.7	13.51

## Sheet: Figure8-Supplement 1B
	Distance from walls (cm)
	Start-0:01:00	0:01:00-0:02:00	0:02:00-0:03:00	0:03:00-0:04:00	0:04:00-0:05:00	0:05:00-0:06:00	0:06:00-0:07:00	0:07:00-0:08:00	0:08:00-0:09:00	0:09:00-0:10:00
control1	3.13	9.47	9.58	5.37	8.49	9.2	5.87	1.9	2.38	1.25
control2	4.71	0.85	0.84	0.98	0.82	0.93	0.93	0.92	0.75	0.74
control3	3.46	7.28	6.65	2.09	2.16	2.58	2.5	2.66	2.74	1.38
control4	6.9	9.89	8.87	7.45	5.81	0.84	0.83	0.88	2.05	1.61
control5	3.98	3.63	2.55	1.5	2.47	2.02	1.71	2.96	3.52	3.24
control6	2.31	1.97	1.83	1.08	1	1.56	1.57	1.46	1.2	1.22
control7	2.03	1.01	0.86	0.88	0.92	1.09	0.97	1.07	1.2	0.92
control8	2.88	2.76	2.95	2.18	1.16	0.99	1.02	0.93	1.57	2.09
control9	1	1.01	0.99	1.41	1.84	2.02	1.69	1.82	1.52	1.63
control10	6.44	5.62	1.53	1.02	0.84	0.77	1.09	1.28	2.3	0.76
control11	6.62	6.38	6.27	5.88	2.18	1.74	1	0.83	0.89	1.4
control12	9.23	7.59	9.56	9.21	6.98	2.49	1.42	1.48	0.98	1.06
control13	7.5	10.63	7.82	4.68	1.53	2.33	2.26	0.94	0.84	2.26
control14	6.21	7.21	3.81	2.47	4.15	1.76	1.53	2.47	2.12	1.82
control15	5.73	1.42	0.72	0.68	0.55	0.6	1.54	1.5	0.85	1.19
control16	3.21	5.35	5.56	5.49	3.96	1.51	0.83	0.7	1.05	0.72
ablated 1	3.22	2.52	1.91	1.71	1.69	1.88	0.99	1.06	1.18	0.97
ablated 2	4.96	5.71	5.1	2.88	1.89	1.98	1.98	1.94	1.58	1.94
ablated 3	6.5	6.32	3.78	2.81	3.36	2.9	2.93	4.2	2.65	1.79
ablated 4	3.87	1.18	0.76	0.94	0.97	1.12	0.77	1.57	0.97	0.76
ablated 5	4.76	4.93	4.69	4.45	3.25	2.63	1.96	1.91	4.73	4.19
ablated 6	4.46	9.49	10.01	10.35	6.74	5.87	8.6	9.61	5.26	3.15
ablated 7	3.79	8.15	7.99	8.6	8.61	8.6	8.6	8.6	8.6	8.62
ablated 8	6.17	6.8	1.83	1.97	1.88	1.63	2.1	1.61	0.91	0.95
ablated 9	5.45	4.15	2.42	0.88	0.81	1.17	1.23	0.73	2.08	1.02
ablated 10	2.39	1.89	2.5	1.26	1.67	1.14	3.91	1.53	5.64	3.4
ablated 11	2.87	1.05	0.91	1.59	1.44	1.24	1.44	0.97	1.58	3.1
ablated 12	6.82	6.42	3.25	1.12	1.84	1.42	2.53	1.83	1.06	1.12
ablated 13	3.73	6.06	6.7	2.15	1.28	1.05	0.99	0.8	1.87	0.62
