# Supplementary material for: Homeodomain protein Otp affects developmental neuropeptide switching in oxytocin neurons associated with a long-term effect on social behavior
Source: eLife. 2017 Jan 17;6:e22170. doi: 10.7554/eLife.22170 (PMC5293488; doi:10.7554/eLife.22170)
Supplement: Figure 8—source data 1. — DOI: http://dx.doi.org/10.7554/eLife.22170.022 [file elife-22170-fig8-data1.xlsx]

## Sheet: Figure 8F
	Number of GFP+ cells in the NPO					Number of GFP+ cells in the PT
fish no.	before ablation	after ablation	% change		fish no.	before ablation	after ablation	% change
1	46	45	-2.17391		1	19	10	-47.3684
2	48	45	-6.25		2	15	5	-66.6667
3	46	45	-2.17391		3	20	10	-50
4	38	40	5.26316		4	14	4	-71.4286
5	50	50	0		5	17	3	-82.3529
		mean	-1.06693				mean	-63.5633

## Sheet: Figure 8G
	Time in social zone (seconds)
	Start-0:03:00	0:03:00-0:06:00	0:06:00-0:09:00
control 1	130.08	180	180
control 2	178.64	180	180
control 3	0.68	154.76	180
control 4	0	0	0
control 5	105.68	100.92	89.88
control 6	180	180	179.8
control 7	0	0	0
control 8	13.4	157.84	142.04
control 9	104.08	172.76	168.8
control 10	160.72	180	179.24
control 11	55.24	94.24	8.8
control 12	39.08	180	180
control 13	47.64	87.16	122.44
control 14	147.84	173.24	175
ablated 1	0	134.44	179.6
ablated 2	0	6.08	65.6
ablated 3	180	174.72	96.68
ablated 4	12.44	108.36	51.88
ablated 5	2.56	85.8	10.8
ablated 6	0	0	0
ablated 7	0	0	0.12
ablated 8	6.04	39.36	41.84
ablated 9	0	0	0
ablated 10	64.12	45.88	29.76
ablated 11	180	180	180
ablated 12	152.04	180	170.92

## Sheet: Figure 8H
	Time in non-social zone (seconds)
	Start-0:03:00	0:03:00-0:06:00	0:06:00-0:09:00
control 1	1.16	0	0
control 2	0	0	0
control 3	0	0	0
control 4	0	0	0
control 5	0.24	0.36	15.88
control 6	0	0	0
control 7	0	0	0
control 8	49.96	5.24	17.36
control 9	0	0	0
control 10	0	0	0
control 11	17.08	13.92	23.28
control 12	31.32	0	0
control 13	14.64	28.72	15.12
control 14	3.68	0	0
ablated 1	0.56	0.28	0
ablated 2	1.92	1.68	18.16
ablated 3	0	0	22.88
ablated 4	2.44	11.04	6.48
ablated 5	2.96	42.36	140.68
ablated 6	0	0.24	0
ablated 7	0.16	0	1.32
ablated 8	0	0.84	13.36
ablated 9	0	0	8.6
ablated 10	0	0	14.92
ablated 11	0	0	0
ablated 12	0	0	0

## Sheet: Figure 8I
	Distance moved (cm)
	Start-0:03:00	0:03:00-0:06:00	0:06:00-0:09:00
control 1	1270	1191.78	1144.58
control 2	856.35	774.46	761.5
control 3	105.82	880.75	649.46
control 4	7.58	5.59	5.46
control 5	1002.68	1062.56	889.26
control 6	767.15	887.62	817.69
control 7	6.38	5.74	5.51
control 8	658.73	654.11	630.67
control 9	604.93	866.38	851.39
control 10	656.43	703.88	685.28
control 11	904.8	685	754.09
control 12	980.34	882.24	857.34
control 13	873.27	859.43	757.04
control 14	680.29	590.73	522.32
ablated 1	1648.2	1218.63	907.09
ablated 2	735.76	1099	1025.37
ablated 3	804.32	752.92	919.29
ablated 4	2204.4	1501.14	1619.57
ablated 5	1233.82	984.69	1151.61
ablated 6	8.39	118.56	474.37
ablated 7	1321.24	1164.41	982.65
ablated 8	992.34	1195.06	1094.39
ablated 9	8.93	6.73	387.39
ablated 10	684.71	753.16	982.54
ablated 11	533.9	960.31	836.44
ablated 12	584.82	576.05	563.55
